# Supplementary material for: RNA polymerase inaccuracy underlies SARS-CoV-2 variants and vaccine heterogeneity
Source: Research Square preprint supplement (doi:10.21203/rs.3.rs-1690086/v1), 2022-06-02
Supplement: Supplementary file 1 [file 00964f9fca4ccce219cb22f5.xlsx]

## Sheet: Sup. Table 2
POS	REF	adj.depth	all	all.rate	all.adj.p.value	type			Supplementary Table 2
88	G	816	8	0.00980392	2.8432e-11	elevated rate
123	C	40674	27	0.000663815	2.7004e-10	elevated rate
129	A	103424	2	1.93379e-05	0.0380267	reduced rate
130	T	103918	1	9.62297e-06	0.00646135	reduced rate
131	A	104169	1	9.59978e-06	0.00646456	reduced rate
132	A	104187	2	1.91963e-05	0.0386757	reduced rate
136	A	105267	2	1.89993e-05	0.0284877	reduced rate
138	A	106646	1	9.37682e-06	0.0069027	reduced rate
139	A	106600	2	1.87617e-05	0.0290525	reduced rate
140	C	106688	39	0.000365552	1.67296e-07	elevated rate
143	A	106699	0	0	0.00072492	reduced rate
145	T	106627	1	9.37849e-06	0.0069027	reduced rate
147	C	106692	28	0.000262438	0.00472272	elevated rate
150	T	107395	2	1.86228e-05	0.0293838	reduced rate
154	T	107608	2	1.8586e-05	0.0295414	reduced rate
163	A	111007	2	1.80169e-05	0.0225925	reduced rate
170	A	111042	1	9.0056e-06	0.00362281	reduced rate
172	T	111221	0	0	0.000358846	reduced rate
178	A	111325	2	1.79654e-05	0.0163673	reduced rate
179	T	111142	2	1.7995e-05	0.022691	reduced rate
186	C	111202	40	0.000359706	1.62648e-07	elevated rate
188	G	111575	2	1.79252e-05	0.0163673	reduced rate
189	G	111428	2	1.79488e-05	0.0163673	reduced rate
192	G	111456	2	1.79443e-05	0.0163673	reduced rate
194	T	111511	1	8.96773e-06	0.00364834	reduced rate
195	T	111866	0	0	0.000361733	reduced rate
198	G	112665	2	1.77517e-05	0.0165141	reduced rate
202	T	112551	0	0	0.000369472	reduced rate
203	C	112979	27	0.000238982	0.0246706	elevated rate
211	T	113104	2	1.76828e-05	0.0166318	reduced rate
215	A	114261	2	1.75038e-05	0.0170232	reduced rate
222	C	115912	50	0.000431362	3.41461e-12	elevated rate
223	A	116354	0	0	0.000271688	reduced rate
226	A	116093	1	8.61378e-06	0.00281724	reduced rate
229	A	116039	2	1.72356e-05	0.0126413	reduced rate
231	A	116046	2	1.72345e-05	0.0126413	reduced rate
234	T	92128	0	0	0.00251644	reduced rate
239	T	92158	1	1.08509e-05	0.0209036	reduced rate
241	C	92080	34	0.000369244	1.27241e-06	elevated rate
246	G	92492	1	1.08117e-05	0.0210759	reduced rate
253	A	94086	0	0	0.00267431	reduced rate
257	A	92601	23	0.000248377	0.0330995	elevated rate
262	T	92395	1	1.08231e-05	0.0210329	reduced rate
263	A	92614	1	1.07975e-05	0.0211411	reduced rate
266	A	92568	0	0	0.00253771	reduced rate
300	C	83601	29	0.000346886	4.00673e-05	elevated rate
302	C	83982	101	0.00120264	2.83196e-62	elevated rate
303	A	83684	1	1.19497e-05	0.0363187	reduced rate
311	C	85581	34	0.000397284	2.4167e-07	elevated rate
313	C	86607	26	0.000300207	0.00121018	elevated rate
316	T	86449	1	1.15675e-05	0.0380718	reduced rate
318	T	87080	1	1.14837e-05	0.0275393	reduced rate
325	T	87562	1	1.14205e-05	0.027547	reduced rate
328	A	87642	1	1.14101e-05	0.027547	reduced rate
332	G	87178	22	0.000252357	0.0388603	elevated rate
335	C	86353	85	0.000984332	9.93787e-46	elevated rate
337	C	86003	91	0.0010581	1.58281e-51	elevated rate
344	C	83759	22	0.000262658	0.0196251	elevated rate
353	G	91771	0	0	0.00251519	reduced rate
363	A	92032	0	0	0.00251644	reduced rate
375	A	99010	2	2.02e-05	0.0472753	reduced rate
376	G	98959	2	2.02104e-05	0.0472753	reduced rate
378	T	99379	2	2.0125e-05	0.0472895	reduced rate
381	T	99361	2	2.01286e-05	0.0472895	reduced rate
382	A	99472	0	0	0.00131452	reduced rate
383	T	99809	1	1.00191e-05	0.0123087	reduced rate
388	G	101713	1	9.83158e-06	0.00890938	reduced rate
393	G	106278	1	9.40929e-06	0.00681701	reduced rate
395	C	107061	34	0.000317576	3.2225e-05	elevated rate
396	A	107605	2	1.85865e-05	0.0295414	reduced rate
398	C	108946	37	0.000339618	2.30724e-06	elevated rate
399	A	109560	1	9.12742e-06	0.0050344	reduced rate
401	C	118053	33	0.000279535	0.000565633	elevated rate
402	T	118746	2	1.68427e-05	0.00966024	reduced rate
404	A	119575	3	2.50889e-05	0.0348244	reduced rate
416	T	120356	0	0	0.000133775	reduced rate
417	G	120857	31	0.000256501	0.00380995	elevated rate
418	T	120396	3	2.49178e-05	0.0353037	reduced rate
420	G	121056	3	2.47819e-05	0.0357732	reduced rate
423	T	120889	0	0	0.000133963	reduced rate
426	T	121812	1	8.20937e-06	0.00147111	reduced rate
430	A	123507	0	0	9.69142e-05	reduced rate
433	T	125060	2	1.59923e-05	0.0053604	reduced rate
435	A	134597	3	2.22888e-05	0.0126413	reduced rate
437	A	100790	1	9.92162e-06	0.00881372	reduced rate
443	G	109300	112	0.0010247	3.38899e-62	elevated rate
445	T	113430	2	1.7632e-05	0.0166664	reduced rate
446	T	144295	3	2.07907e-05	0.00552366	reduced rate
447	T	144082	1	6.94049e-06	0.000168941	reduced rate
453	A	142282	2	1.40566e-05	0.00129214	reduced rate
454	A	141465	2	1.41378e-05	0.00129214	reduced rate
456	T	142478	2	1.40373e-05	0.00129214	reduced rate
457	T	142439	2	1.40411e-05	0.00129214	reduced rate
459	A	142123	2	1.40723e-05	0.00129214	reduced rate
460	A	142236	1	7.03057e-06	0.00023674	reduced rate
462	A	142225	1	7.03111e-06	0.00023674	reduced rate
467	T	144572	1	6.91697e-06	0.000170375	reduced rate
468	A	142993	3	2.098e-05	0.0053969	reduced rate
469	T	144893	1	6.90164e-06	0.000171039	reduced rate
471	T	145122	2	1.37815e-05	0.000968687	reduced rate
473	T	145819	5	3.42891e-05	0.0421643	reduced rate
474	T	146036	4	2.73905e-05	0.0146172	reduced rate
477	T	155462	2	1.28649e-05	0.000392979	reduced rate
480	A	153925	3	1.949e-05	0.00250108	reduced rate
481	A	152938	5	3.2693e-05	0.0269749	reduced rate
484	T	154645	2	1.29328e-05	0.000565253	reduced rate
493	T	150533	4	2.65722e-05	0.0116162	reduced rate
496	A	149033	1	6.70992e-06	0.000128872	reduced rate
499	T	149260	1	6.69972e-06	0.000129966	reduced rate
502	A	145922	5	3.42649e-05	0.0421643	reduced rate
504	C	145296	47	0.000323478	1.7382e-07	elevated rate
506	C	144494	70	0.000484449	7.84901e-20	elevated rate
507	A	142437	133	0.000933746	2.91006e-69	elevated rate
509	G	141802	1138	0.00802527	0	elevated rate
512	C	141251	66	0.000467253	6.65436e-18	elevated rate
513	A	139945	38	0.000271535	0.000341641	elevated rate
514	T	141117	371	0.00262902	0	elevated rate
515	G	140215	217	0.00154762	1.67367e-156	elevated rate
517	T	140079	430	0.0030697	0	elevated rate
518	A	138029	118	0.000854893	1.77758e-57	elevated rate
519	T	139080	33	0.000237274	0.0101504	elevated rate
520	G	138080	45	0.000325898	2.93831e-07	elevated rate
521	G	138181	43	0.000311186	2.07905e-06	elevated rate
522	T	137522	46	0.000334492	9.79479e-08	elevated rate
527	C	135862	41	0.000301777	9.09118e-06	elevated rate
531	T	131366	2	1.52246e-05	0.00432572	reduced rate
532	A	130541	2	1.53209e-05	0.00421298	reduced rate
538	A	128065	3	2.34256e-05	0.0213189	reduced rate
545	G	123669	0	0	9.69142e-05	reduced rate
552	A	121641	3	2.46627e-05	0.0269262	reduced rate
554	T	120426	3	2.49116e-05	0.0353037	reduced rate
555	A	118402	1	8.4458e-06	0.0020416	reduced rate
559	T	112538	1	8.88589e-06	0.00375343	reduced rate
570	A	78109	0	0	0.0125889	reduced rate
610	A	17203	12	0.000697553	0.00012081	elevated rate
635	C	23360	19	0.000813356	1.68404e-08	elevated rate
661	T	23005	9	0.000391219	0.04934	elevated rate
683	C	23759	18	0.000757608	1.4172e-07	elevated rate
685	A	25599	99	0.00386734	2.52888e-108	elevated rate
691	A	25335	16	0.000631537	1.02275e-05	elevated rate
815	C	6796	5	0.000735727	0.0403862	elevated rate
823	C	13060	9	0.000689127	0.00180064	elevated rate
843	C	14070	8	0.000568586	0.0122494	elevated rate
854	C	13990	16	0.00114367	4.06392e-09	elevated rate
857	C	14064	11	0.000782139	0.000113525	elevated rate
880	A	29437	13	0.000441621	0.00321499	elevated rate
882	C	29557	12	0.000405995	0.0103002	elevated rate
920	C	36211	12	0.000331391	0.0409691	elevated rate
927	T	36396	39	0.00107155	6.14977e-22	elevated rate
934	C	39324	52	0.00132235	1.15216e-33	elevated rate
936	C	39347	15	0.000381223	0.00429373	elevated rate
1012	T	36358	27	0.000742615	2.34266e-11	elevated rate
1077	C	26562	10	0.000376478	0.0404485	elevated rate
1135	G	22844	19	0.000831728	1.19188e-08	elevated rate
1150	C	18977	11	0.000579649	0.00127415	elevated rate
1163	A	18301	47	0.00256817	5.66187e-43	elevated rate
1190	C	15961	8	0.000501222	0.0235047	elevated rate
1191	C	15863	15	0.000945597	1.81534e-07	elevated rate
1254	C	13809	11	0.000796582	9.69142e-05	elevated rate
1255	A	13924	8	0.000574548	0.0117192	elevated rate
1267	C	32822	12	0.000365608	0.0213189	elevated rate
1269	A	32944	20	0.000607091	6.19899e-07	elevated rate
1288	C	39793	18	0.000452341	0.000158843	elevated rate
1314	C	44504	16	0.000359518	0.00483145	elevated rate
1349	C	54879	28	0.000510213	3.52596e-08	elevated rate
1367	A	58059	22	0.000378925	0.00020418	elevated rate
1380	C	55254	17	0.00030767	0.0144018	elevated rate
1385	C	57093	37	0.000648065	6.20515e-14	elevated rate
1387	C	55494	16	0.000288319	0.0337188	elevated rate
1392	C	54740	17	0.000310559	0.0131428	elevated rate
1441	C	54586	24	0.000439673	7.20944e-06	elevated rate
1469	C	55953	23	0.000411059	3.76254e-05	elevated rate
1628	C	10922	8	0.000732467	0.00298794	elevated rate
1800	C	12958	15	0.00115759	1.36782e-08	elevated rate
1806	G	15166	12	0.000791244	3.63768e-05	elevated rate
1813	T	15123	37	0.0024466	6.20791e-33	elevated rate
1828	G	14914	10	0.000670511	0.000937864	elevated rate
1853	C	18181	27	0.00148507	1.8716e-18	elevated rate
1878	C	17940	8	0.000445931	0.0416622	elevated rate
1884	C	17963	19	0.00105773	2.3469e-10	elevated rate
1912	C	17281	9	0.000520803	0.0103611	elevated rate
1987	A	780	4	0.00512821	0.000217042	elevated rate
2106	C	2824	26	0.0092068	2.07731e-37	elevated rate
2113	C	2808	6	0.00213675	0.000115881	elevated rate
2147	C	2665	4	0.00150094	0.0123087	elevated rate
2173	G	2316	4	0.00172712	0.00807294	elevated rate
2174	G	2390	6	0.00251046	4.84674e-05	elevated rate
2178	G	2762	4	0.00144823	0.0136552	elevated rate
2227	C	4163	5	0.00120106	0.00684057	elevated rate
2291	C	4275	6	0.00140351	0.000922429	elevated rate
2330	T	2902	32	0.0110269	1.06036e-48	elevated rate
2331	G	3145	18	0.00572337	4.62181e-22	elevated rate
2334	C	3783	16	0.00422945	1.59552e-17	elevated rate
2459	C	10300	14	0.00135922	7.53251e-09	elevated rate
2472	C	8895	6	0.000674536	0.0243815	elevated rate
3031	T	1410	3	0.00212766	0.022824	elevated rate
3186	A	1905	3	0.0015748	0.0449562	elevated rate
3217	T	1885	3	0.00159151	0.0439223	elevated rate
3718	T	4623	101	0.0218473	1.13678e-185	elevated rate
3732	C	5281	5	0.00094679	0.0165021	elevated rate
3768	C	4557	5	0.00109721	0.00971113	elevated rate
3857	C	667	4	0.005997	0.000127252	elevated rate
3866	C	5012	7	0.00139665	0.000222887	elevated rate
3893	G	5510	9	0.00163339	3.23398e-06	elevated rate
3955	G	6842	5	0.00073078	0.0409745	elevated rate
3961	C	6843	5	0.000730674	0.0409745	elevated rate
4116	C	4734	8	0.0016899	1.36382e-05	elevated rate
4158	C	5067	5	0.000986777	0.0143231	elevated rate
4386	A	2646	4	0.00151172	0.0120875	elevated rate
4456	C	2810	6	0.00213523	0.000115988	elevated rate
4528	A	1969	4	0.00203149	0.00472886	elevated rate
4534	C	1972	3	0.0015213	0.0477511	elevated rate
4626	C	2873	4	0.00139227	0.015551	elevated rate
4640	T	3857	4	0.00103708	0.0371571	elevated rate
4643	G	4056	12	0.00295858	3.08516e-11	elevated rate
4668	C	5990	7	0.00116861	0.000609038	elevated rate
4755	C	4290	7	0.0016317	9.24271e-05	elevated rate
4884	A	1349	3	0.00222387	0.0206011	elevated rate
4897	C	1243	36	0.0289622	6.21262e-70	elevated rate
5005	C	2924	4	0.00136799	0.0163027	elevated rate
5143	T	3526	4	0.00113443	0.0285878	elevated rate
5165	T	3787	32	0.00844996	4.58326e-45	elevated rate
5219	C	4948	5	0.00101051	0.0130388	elevated rate
5284	C	6079	6	0.000987004	0.00469369	elevated rate
5301	C	6608	5	0.000756659	0.0371568	elevated rate
5433	G	336	2	0.00595238	0.0258108	elevated rate
5457	C	460	11	0.023913	6.73025e-20	elevated rate
5605	G	90	3	0.0333333	1.91098e-05	elevated rate
5639	C	436	2	0.00458716	0.0386914	elevated rate
5784	C	2498	4	0.00160128	0.0101504	elevated rate
5826	C	3739	4	0.0010698	0.0340087	elevated rate
5866	C	6254	211	0.0337384	0	elevated rate
5869	C	6347	5	0.000787774	0.0321218	elevated rate
5884	C	7035	8	0.00113717	0.00019981	elevated rate
5934	C	6013	17	0.00282721	7.95038e-16	elevated rate
6027	C	5954	6	0.00100773	0.00425977	elevated rate
6044	A	5825	7	0.00120172	0.000518084	elevated rate
6063	A	6200	7	0.00112903	0.000732142	elevated rate
6109	G	6346	6	0.000945477	0.00564877	elevated rate
6236	G	3017	4	0.00132582	0.0176508	elevated rate
6457	T	2603	6	0.00230503	7.7952e-05	elevated rate
6525	C	1822	3	0.00164654	0.0408154	elevated rate
6696	C	919	3	0.00326442	0.00850873	elevated rate
7009	T	6799	5	0.000735402	0.0403862	elevated rate
7080	A	9226	7	0.000758725	0.00597709	elevated rate
7187	C	3133	4	0.00127673	0.019943	elevated rate
7213	G	7328	6	0.000818777	0.0108942	elevated rate
7281	A	8496	7	0.000823917	0.00393384	elevated rate
7288	T	8502	7	0.000823336	0.00394401	elevated rate
7296	C	8431	8	0.000948879	0.000622317	elevated rate
7334	C	6069	5	0.000823859	0.027547	elevated rate
7351	T	7724	8	0.00103573	0.000361733	elevated rate
7571	G	3568	7	0.00196188	2.92369e-05	elevated rate
7573	C	3841	4	0.0010414	0.0366763	elevated rate
7660	T	4790	8	0.00167015	1.47892e-05	elevated rate
7813	T	4045	4	0.000988875	0.0416368	elevated rate
7979	C	3344	4	0.00119617	0.0243229	elevated rate
8010	A	6951	19	0.00273342	1.69015e-17	elevated rate
8160	C	7301	7	0.000958773	0.00179628	elevated rate
8163	T	7528	14	0.00185972	1.41924e-10	elevated rate
8166	T	8133	49	0.00602484	2.40754e-62	elevated rate
8197	A	20583	18	0.000874508	1.66375e-08	elevated rate
8208	C	31376	11	0.000350586	0.0411268	elevated rate
8247	C	34031	16	0.00047016	0.000323679	elevated rate
8290	C	37545	19	0.000506059	1.89866e-05	elevated rate
8299	C	37462	16	0.000427099	0.000901454	elevated rate
8320	C	34936	14	0.000400733	0.00434955	elevated rate
8376	C	30908	16	0.000517665	0.000113525	elevated rate
8389	C	28310	39	0.00137761	1.03564e-25	elevated rate
8453	C	17570	8	0.000455322	0.038365	elevated rate
8566	T	3602	9	0.00249861	1.10027e-07	elevated rate
8655	C	5379	6	0.00111545	0.00272853	elevated rate
8667	A	5424	22	0.00405605	6.23265e-24	elevated rate
8717	C	3858	5	0.00129601	0.00507008	elevated rate
8772	C	3865	10	0.00258732	9.95451e-09	elevated rate
8832	C	3462	4	0.0011554	0.0271599	elevated rate
8859	T	3425	23	0.00671533	6.28617e-30	elevated rate
8907	T	12075	9	0.000745342	0.00108393	elevated rate
8927	G	13513	10	0.000740028	0.000444501	elevated rate
8950	C	13944	9	0.000645439	0.00276099	elevated rate
9023	A	12117	7	0.000577701	0.0224679	elevated rate
9044	G	6161	5	0.000811557	0.0290525	elevated rate
9045	G	6025	12	0.0019917	2.55561e-09	elevated rate
9081	T	7088	7	0.000987585	0.0015069	elevated rate
9180	C	15727	8	0.000508679	0.0216917	elevated rate
9313	A	4528	11	0.00242933	2.24729e-09	elevated rate
9430	C	6394	7	0.00109478	0.000882616	elevated rate
9470	A	6467	12	0.00185557	5.60273e-09	elevated rate
9573	G	10892	7	0.000642674	0.0136347	elevated rate
9604	A	10454	6	0.000573943	0.046104	elevated rate
9615	C	10149	7	0.000689723	0.00974738	elevated rate
9627	C	9365	9	0.000961025	0.000187476	elevated rate
9835	T	4247	4	0.000941841	0.0472895	elevated rate
9837	T	4350	5	0.00114943	0.00821553	elevated rate
9859	A	8078	7	0.000866551	0.00308764	elevated rate
9943	C	20350	14	0.000687961	2.17714e-05	elevated rate
9953	G	22084	11	0.000498098	0.00392127	elevated rate
9954	C	22043	43	0.00195073	2.07627e-34	elevated rate
9967	C	22806	9	0.000394633	0.0472895	elevated rate
9969	C	22901	15	0.000654993	1.57182e-05	elevated rate
9979	C	22842	9	0.000394011	0.0475474	elevated rate
9996	C	21863	9	0.000411654	0.0387852	elevated rate
10025	C	22792	9	0.000394875	0.0472895	elevated rate
10078	C	16544	10	0.000604449	0.00198281	elevated rate
10084	T	14157	7	0.000494455	0.0451516	elevated rate
10086	G	14136	13	0.000919638	2.56826e-06	elevated rate
10189	C	7185	7	0.000974252	0.00163456	elevated rate
10244	C	5677	9	0.00158534	4.0933e-06	elevated rate
10301	C	9687	7	0.000722618	0.00776826	elevated rate
10369	C	10434	9	0.000862565	0.000395701	elevated rate
10450	C	8412	8	0.000951022	0.000614454	elevated rate
10557	C	15461	8	0.000517431	0.019943	elevated rate
10594	C	28354	13	0.000458489	0.00239377	elevated rate
10623	C	36221	13	0.000358908	0.0163673	elevated rate
10660	T	36954	26	0.000703577	1.97047e-10	elevated rate
10702	C	33042	14	0.000423703	0.00273051	elevated rate
10720	A	34389	15	0.000436186	0.001238	elevated rate
10726	C	35324	13	0.000368022	0.0135952	elevated rate
10833	C	10405	17	0.00163383	4.54818e-12	elevated rate
10841	G	7229	5	0.000691659	0.0486765	elevated rate
10853	T	4246	5	0.00117758	0.00743224	elevated rate
10854	C	3439	4	0.00116313	0.026625	elevated rate
10872	A	315	2	0.00634921	0.0230156	elevated rate
11006	C	3861	116	0.030044	1.31747e-229	elevated rate
11074	C	5694	137	0.0240604	5.01234e-258	elevated rate
11083	G	5438	20	0.00367782	6.82109e-21	elevated rate
11107	T	5722	7	0.00122335	0.000466643	elevated rate
11195	C	8173	6	0.000734125	0.0168792	elevated rate
11208	C	8766	6	0.000684463	0.0228063	elevated rate
11251	T	9896	87	0.00879143	1.74472e-125	elevated rate
11289	C	17530	9	0.000513406	0.0113595	elevated rate
11322	C	15020	9	0.000599201	0.00433039	elevated rate
11339	C	16132	8	0.000495909	0.0249825	elevated rate
11379	C	15709	9	0.00057292	0.00570019	elevated rate
11521	G	26944	19	0.000705166	1.5605e-07	elevated rate
11522	T	27080	10	0.000369276	0.0449562	elevated rate
11535	G	27853	13	0.000466736	0.00203837	elevated rate
11540	G	28046	15	0.000534836	0.000156246	elevated rate
11567	A	38382	13	0.0003387	0.0251765	elevated rate
11575	C	40729	13	0.000319183	0.0383302	elevated rate
11628	A	39001	22	0.000564088	4.16512e-07	elevated rate
11635	T	39378	14	0.000355528	0.0120252	elevated rate
11645	T	39097	16	0.000409239	0.00135967	elevated rate
11653	C	39247	73	0.00186001	1.60017e-57	elevated rate
11665	C	33278	15	0.000450748	0.000899275	elevated rate
11670	G	33556	28	0.000834426	5.64235e-13	elevated rate
11704	C	33168	12	0.000361795	0.0229159	elevated rate
11751	T	23415	10	0.000427077	0.0192276	elevated rate
11962	C	2844	6	0.0021097	0.000122715	elevated rate
11990	G	5584	8	0.00143266	4.23797e-05	elevated rate
12003	C	5358	6	0.00111982	0.00268165	elevated rate
12006	T	5472	5	0.000913743	0.0188216	elevated rate
12013	T	8306	6	0.000722369	0.018149	elevated rate
12015	T	8414	6	0.000713097	0.0192617	elevated rate
12036	C	9095	6	0.000659703	0.0269421	elevated rate
12071	G	8642	7	0.000809998	0.00428514	elevated rate
12082	A	8748	13	0.00148605	1.23602e-08	elevated rate
12162	A	8326	7	0.00084074	0.00358693	elevated rate
12312	C	19295	15	0.000777403	2.00608e-06	elevated rate
12505	T	5417	5	0.00092302	0.018056	elevated rate
12768	C	8423	56	0.00664846	9.9809e-74	elevated rate
12769	G	9050	7	0.000773481	0.00538505	elevated rate
12789	C	9633	6	0.000622859	0.0340087	elevated rate
12823	C	8910	6	0.000673401	0.0245643	elevated rate
12907	G	4889	10	0.00204541	8.56483e-08	elevated rate
12924	C	3418	5	0.00146284	0.00321499	elevated rate
13115	C	14522	14	0.000964055	4.69006e-07	elevated rate
13162	T	27093	13	0.000479829	0.00156692	elevated rate
13170	C	27258	14	0.000513611	0.000448837	elevated rate
13201	G	27368	10	0.00036539	0.0472895	elevated rate
13306	T	9704	8	0.000824402	0.0014529	elevated rate
13316	C	11263	8	0.00071029	0.00355433	elevated rate
13445	G	7861	8	0.00101768	0.000402476	elevated rate
13459	G	8233	9	0.00109316	7.43292e-05	elevated rate
13481	T	8166	6	0.000734754	0.0168255	elevated rate
13499	C	9284	6	0.000646273	0.0290763	elevated rate
13541	C	12090	8	0.000661704	0.00521453	elevated rate
13653	A	2171	5	0.00230309	0.000504896	elevated rate
13926	G	11734	8	0.000681779	0.00441631	elevated rate
14081	G	8444	7	0.000828991	0.00381481	elevated rate
14172	A	5636	6	0.00106458	0.00335271	elevated rate
14183	C	5525	5	0.000904977	0.0194807	elevated rate
14229	G	3422	5	0.00146113	0.0032178	elevated rate
14251	T	4404	10	0.00227066	3.30515e-08	elevated rate
14422	C	7285	6	0.00082361	0.0106065	elevated rate
14555	T	39307	25	0.000636019	4.05029e-09	elevated rate
14599	C	40341	17	0.000421408	0.000611834	elevated rate
14649	C	37411	28	0.000748443	7.11806e-12	elevated rate
14657	C	36472	13	0.000356438	0.0170232	elevated rate
14676	C	31430	11	0.000349984	0.0415532	elevated rate
14724	C	18161	10	0.00055063	0.00374052	elevated rate
14850	A	3950	4	0.00101266	0.0394269	elevated rate
14867	T	4620	14	0.0030303	2.55519e-13	elevated rate
14925	C	6762	10	0.00147885	1.46979e-06	elevated rate
15017	C	7015	14	0.00199572	5.65229e-11	elevated rate
15024	C	6901	7	0.00101435	0.00130915	elevated rate
15026	C	6823	8	0.0011725	0.000166059	elevated rate
15157	C	7976	10	0.00125376	6.17819e-06	elevated rate
15187	A	10251	6	0.000585309	0.0425152	elevated rate
15188	G	10299	8	0.000776774	0.00212529	elevated rate
15194	C	10598	7	0.000660502	0.0120676	elevated rate
15216	C	11271	7	0.000621063	0.0161779	elevated rate
15227	G	15142	41	0.0027077	2.75254e-38	elevated rate
15240	C	48181	25	0.000518877	2.03715e-07	elevated rate
15259	A	57126	17	0.000297588	0.0192593	elevated rate
15261	T	57598	20	0.000347234	0.0014284	elevated rate
15267	A	63609	0	0	0.0396287	reduced rate
15271	A	63639	0	0	0.0396287	reduced rate
15277	C	63798	20	0.000313489	0.0045777	elevated rate
15284	T	63680	0	0	0.0396287	reduced rate
15286	G	63906	0	0	0.0398525	reduced rate
15289	T	63787	0	0	0.0397275	reduced rate
15296	A	63566	0	0	0.0396287	reduced rate
15302	A	63648	0	0	0.0396287	reduced rate
15308	A	64502	0	0	0.0406048	reduced rate
15312	A	64607	0	0	0.0407688	reduced rate
15316	A	64921	0	0	0.0409745	reduced rate
15317	T	64732	0	0	0.0408154	reduced rate
15324	C	65091	26	0.000399441	1.27558e-05	elevated rate
15325	A	65298	0	0	0.0290525	reduced rate
15326	T	65513	0	0	0.0290525	reduced rate
15337	A	66465	18	0.000270819	0.0446347	elevated rate
15338	T	66730	0	0	0.0293677	reduced rate
15351	T	66113	0	0	0.0290979	reduced rate
15352	C	66266	18	0.000271633	0.0440403	elevated rate
15358	C	66269	21	0.00031689	0.00297105	elevated rate
15361	A	66182	0	0	0.0290988	reduced rate
15363	A	66002	0	0	0.029082	reduced rate
15371	C	54310	23	0.000423495	2.3244e-05	elevated rate
15404	T	62166	0	0	0.0389699	reduced rate
15483	A	26459	38	0.00143618	1.14906e-25	elevated rate
15579	C	3764	7	0.00185972	4.04263e-05	elevated rate
15720	C	4361	5	0.00114653	0.0082855	elevated rate
15830	C	4594	16	0.0034828	3.10723e-16	elevated rate
15944	C	5394	6	0.00111235	0.00275979	elevated rate
16133	A	1180	3	0.00254237	0.0152646	elevated rate
16149	T	432	5	0.0115741	3.41417e-07	elevated rate
16154	T	10629	9	0.00084674	0.000446544	elevated rate
16247	C	13826	9	0.000650947	0.00263423	elevated rate
16260	C	13618	11	0.000807754	8.59504e-05	elevated rate
16310	T	10032	7	0.000697767	0.00922936	elevated rate
16338	C	11174	16	0.0014319	1.64542e-10	elevated rate
16376	C	12490	8	0.000640512	0.00632049	elevated rate
16466	C	16540	25	0.00151149	3.1215e-17	elevated rate
16515	T	22029	17	0.00077171	2.92526e-07	elevated rate
16597	A	21162	12	0.000567054	0.00072657	elevated rate
16618	G	18667	12	0.000642846	0.000245768	elevated rate
16630	C	19351	13	0.0006718	7.10503e-05	elevated rate
16730	T	7189	5	0.000695507	0.0477511	elevated rate
16733	C	7094	5	0.000704821	0.0465067	elevated rate
16784	C	6209	6	0.000966339	0.00512214	elevated rate
16785	T	6312	8	0.00126743	0.000100129	elevated rate
16800	T	9459	6	0.000634317	0.0313701	elevated rate
16837	G	9834	12	0.00122026	4.69006e-07	elevated rate
16859	C	9886	7	0.000708072	0.00865943	elevated rate
16870	C	10787	15	0.00139056	1.20311e-09	elevated rate
16877	C	12533	11	0.000877683	4.00673e-05	elevated rate
16887	C	11959	10	0.00083619	0.000177954	elevated rate
16983	T	12654	11	0.00086929	4.33855e-05	elevated rate
17036	C	9103	8	0.000878831	0.00100841	elevated rate
17190	T	6127	5	0.00081606	0.0284877	elevated rate
17200	T	7287	6	0.000823384	0.0106065	elevated rate
17267	A	8440	7	0.000829384	0.00381481	elevated rate
17274	C	9584	6	0.000626043	0.0332726	elevated rate
17375	C	7865	7	0.000890019	0.00268165	elevated rate
17410	C	9908	10	0.00100929	3.88072e-05	elevated rate
17441	C	10465	6	0.00057334	0.0463006	elevated rate
17474	C	11471	54	0.00470752	3.88553e-63	elevated rate
17555	C	10203	6	0.000588062	0.0416622	elevated rate
17608	G	5519	5	0.000905961	0.0194103	elevated rate
17639	C	4740	5	0.00105485	0.0113595	elevated rate
17676	C	4483	5	0.00111532	0.00917433	elevated rate
17703	C	7046	5	0.000709622	0.0453376	elevated rate
17719	G	6844	6	0.00087668	0.00811077	elevated rate
17722	G	7085	63	0.00889203	6.67193e-91	elevated rate
17723	T	7446	17	0.00228311	2.41343e-14	elevated rate
17762	C	8504	9	0.00105833	9.5183e-05	elevated rate
17795	C	9087	13	0.00143062	1.91131e-08	elevated rate
17809	A	8992	6	0.00066726	0.0255949	elevated rate
17827	C	8214	187	0.022766	0	elevated rate
18007	G	7054	6	0.000850581	0.00922255	elevated rate
18058	C	11917	8	0.00067131	0.00483145	elevated rate
18086	C	13599	18	0.00132363	2.54074e-11	elevated rate
18096	T	13599	15	0.00110302	2.57644e-08	elevated rate
18138	C	19850	14	0.00070529	1.67087e-05	elevated rate
18167	C	35274	13	0.000368543	0.0134356	elevated rate
18171	C	35595	14	0.000393314	0.00511229	elevated rate
18176	C	37444	17	0.000454011	0.000265849	elevated rate
18269	A	49668	20	0.000402674	0.00023193	elevated rate
18279	A	49149	25	0.000508657	2.92526e-07	elevated rate
18306	C	46888	14	0.000298584	0.0443722	elevated rate
18350	A	28045	14	0.000499198	0.000596819	elevated rate
18366	A	20787	11	0.000529177	0.0025641	elevated rate
18368	G	20418	10	0.000489764	0.00822889	elevated rate
18377	C	16761	8	0.000477298	0.0301823	elevated rate
18383	T	15478	9	0.00058147	0.00520915	elevated rate
18401	C	14070	14	0.000995025	3.23911e-07	elevated rate
18434	A	21818	11	0.000504171	0.00362281	elevated rate
18486	C	24396	13	0.000532874	0.000622317	elevated rate
18508	C	25475	17	0.000667321	2.07277e-06	elevated rate
18526	C	25209	11	0.000436352	0.0101504	elevated rate
18583	G	21350	18	0.000843091	2.89278e-08	elevated rate
18592	T	18389	9	0.000489423	0.0148264	elevated rate
18644	G	55596	19	0.000341751	0.00257436	elevated rate
18652	C	77119	31	0.000401976	8.59779e-07	elevated rate
18657	C	77606	36	0.000463882	1.66126e-09	elevated rate
18662	G	80884	1	1.23634e-05	0.0471742	reduced rate
18663	T	81291	1	1.23015e-05	0.0471858	reduced rate
18678	T	87843	1	1.13839e-05	0.0275846	reduced rate
18680	C	90415	35	0.000387104	2.6761e-07	elevated rate
18687	C	95801	28	0.000292273	0.000982196	elevated rate
18694	A	101589	0	0	0.000955895	reduced rate
18700	T	109095	1	9.16632e-06	0.00495695	reduced rate
18704	A	107857	56	0.000519206	4.43598e-17	elevated rate
18706	A	108033	2	1.85129e-05	0.0214073	reduced rate
18708	T	108977	2	1.83525e-05	0.0215594	reduced rate
18710	A	109649	0	0	0.00051583	reduced rate
18711	T	109769	2	1.82201e-05	0.0218247	reduced rate
18717	T	113165	1	8.83665e-06	0.00381481	reduced rate
18718	T	113367	2	1.76418e-05	0.0166627	reduced rate
18719	G	113200	0	0	0.000378324	reduced rate
18722	A	113187	1	8.83494e-06	0.00381481	reduced rate
18725	A	113271	2	1.76568e-05	0.0166398	reduced rate
18726	T	113039	1	8.8465e-06	0.00381	reduced rate
18727	T	112949	0	0	0.000374332	reduced rate
18728	C	112543	26	0.000231023	0.0382164	elevated rate
18730	A	113234	32	0.000282601	0.000666352	elevated rate
18731	T	113506	2	1.76202e-05	0.0166664	reduced rate
18741	T	101809	67	0.000658095	6.11645e-26	elevated rate
18744	C	101152	55	0.000543736	1.32395e-17	elevated rate
18747	C	101393	32	0.000315604	7.5907e-05	elevated rate
18751	A	99955	1	1.00045e-05	0.0123487	reduced rate
18752	A	99403	1	1.00601e-05	0.0121753	reduced rate
18753	T	99514	2	2.00977e-05	0.0472895	reduced rate
18756	G	98228	34	0.000346133	5.20122e-06	elevated rate
18759	T	97705	0	0	0.00129214	reduced rate
18761	T	98281	2	2.03498e-05	0.0471742	reduced rate
18764	T	97654	2	2.04805e-05	0.0471742	reduced rate
18767	A	96731	1	1.03379e-05	0.0163673	reduced rate
18773	A	96529	1	1.03596e-05	0.0163619	reduced rate
18776	A	96433	1	1.03699e-05	0.0163132	reduced rate
18782	G	91759	26	0.000283351	0.00380995	elevated rate
18785	T	90984	1	1.09909e-05	0.0205599	reduced rate
18786	T	90377	0	0	0.00355433	reduced rate
18788	C	77834	20	0.000256957	0.0377385	elevated rate
18794	A	75949	0	0	0.0118128	reduced rate
18801	A	74474	0	0	0.0166266	reduced rate
18806	A	74019	0	0	0.0163673	reduced rate
18810	T	75470	0	0	0.011752	reduced rate
18815	T	81052	0	0	0.00922255	reduced rate
18824	A	99098	0	0	0.00130915	reduced rate
18825	A	98861	2	2.02304e-05	0.0472753	reduced rate
18831	T	99199	0	0	0.00131044	reduced rate
18832	G	97307	1	1.02768e-05	0.011752	reduced rate
18835	A	100164	2	1.99673e-05	0.0477947	reduced rate
18836	A	99648	2	2.00706e-05	0.0473483	reduced rate
18837	T	99620	1	1.00381e-05	0.0122494	reduced rate
18840	A	98087	0	0	0.00129214	reduced rate
18842	A	98043	2	2.03992e-05	0.0471742	reduced rate
18846	A	97709	1	1.02345e-05	0.011752	reduced rate
18847	G	97684	1	1.02371e-05	0.011752	reduced rate
18850	A	96115	1	1.04042e-05	0.0162048	reduced rate
18855	T	94909	1	1.05364e-05	0.0157502	reduced rate
18857	A	94183	1	1.06176e-05	0.0156212	reduced rate
18860	C	91967	31	0.000337077	3.05346e-05	elevated rate
18866	T	91853	0	0	0.00251519	reduced rate
18867	G	91646	0	0	0.00251519	reduced rate
18870	T	91499	0	0	0.00251519	reduced rate
18878	T	88951	1	1.12421e-05	0.0282149	reduced rate
18884	T	84800	1	1.17925e-05	0.0366763	reduced rate
18887	A	83640	0	0	0.00648079	reduced rate
18892	T	80905	1	1.23602e-05	0.0471742	reduced rate
18899	T	79020	0	0	0.00871022	reduced rate
18900	T	78867	0	0	0.00870692	reduced rate
18911	A	75369	0	0	0.011752	reduced rate
18913	T	75279	0	0	0.011752	reduced rate
18928	C	70000	27	0.000385714	1.44529e-05	elevated rate
18929	C	69639	35	0.000502592	3.80274e-10	elevated rate
18936	T	64217	0	0	0.040299	reduced rate
18952	A	15717	19	0.00120888	2.5639e-11	elevated rate
19003	T	4600	5	0.00108696	0.0101066	elevated rate
19007	C	5044	9	0.0017843	1.60228e-06	elevated rate
19011	C	8553	6	0.000701508	0.0206011	elevated rate
19105	T	11197	9	0.000803787	0.00064203	elevated rate
19152	C	9276	6	0.000646831	0.0290525	elevated rate
19194	G	7073	5	0.000706914	0.0460498	elevated rate
19217	C	8103	7	0.000863878	0.00312957	elevated rate
19220	C	7975	7	0.000877743	0.00287317	elevated rate
19305	T	11755	9	0.000765632	0.000902096	elevated rate
19374	C	10391	6	0.000577423	0.0449562	elevated rate
19550	C	3684	6	0.00162866	0.000440064	elevated rate
19576	C	1943	3	0.001544	0.0471102	elevated rate
19626	A	2462	4	0.0016247	0.00970377	elevated rate
19627	G	2730	4	0.0014652	0.0131428	elevated rate
19628	A	3643	4	0.001098	0.0313309	elevated rate
19796	C	6389	7	0.00109563	0.0008803	elevated rate
19920	T	10753	7	0.000650981	0.0128097	elevated rate
19983	C	24944	256	0.010263	0	elevated rate
19989	T	24734	12	0.000485162	0.00266481	elevated rate
20132	C	25949	13	0.000500983	0.00109549	elevated rate
20150	A	21800	11	0.000504587	0.00360464	elevated rate
20178	C	20359	9	0.000442065	0.0265209	elevated rate
20233	C	13032	11	0.000844076	5.72655e-05	elevated rate
20270	C	3406	6	0.0017616	0.000300825	elevated rate
20271	T	3445	5	0.00145138	0.00331403	elevated rate
20283	C	3427	4	0.0011672	0.0263458	elevated rate
20462	C	1927	5	0.00259471	0.000307787	elevated rate
20468	C	4085	4	0.000979192	0.0428908	elevated rate
20558	T	4546	21	0.00461945	5.96539e-24	elevated rate
20619	T	4833	7	0.00144838	0.000182106	elevated rate
20703	C	3084	10	0.00324254	1.20311e-09	elevated rate
20850	T	2189	5	0.00228415	0.00052136	elevated rate
20956	C	2632	27	0.0102584	4.06522e-40	elevated rate
21022	A	1622	3	0.00184957	0.0318056	elevated rate
21101	G	2033	11	0.00541072	5.64235e-13	elevated rate
21198	T	1046	9	0.00860421	2.96133e-12	elevated rate
21532	A	26943	14	0.000519615	0.000402983	elevated rate
21549	C	39752	15	0.00037734	0.00472272	elevated rate
21565	G	44166	14	0.000316986	0.029065	elevated rate
21569	G	44672	24	0.000537249	2.20144e-07	elevated rate
21575	C	45970	58	0.00126169	1.46781e-36	elevated rate
21578	G	48197	17	0.000352719	0.00392127	elevated rate
21595	C	50722	17	0.00033516	0.00646135	elevated rate
21598	T	51052	20	0.000391757	0.000331007	elevated rate
21622	C	57715	16	0.000277224	0.0450007	elevated rate
21627	C	59214	27	0.000455973	6.26101e-07	elevated rate
21629	C	59835	18	0.000300827	0.0130141	elevated rate
21634	A	60170	17	0.000282533	0.0301823	elevated rate
21642	C	60663	40	0.000659381	2.40383e-15	elevated rate
21646	C	61847	23	0.000371885	0.000170919	elevated rate
21654	C	59763	18	0.00030119	0.0128687	elevated rate
21662	C	54520	16	0.00029347	0.0290525	elevated rate
21691	C	43345	17	0.000392202	0.00131051	elevated rate
21707	C	42237	31	0.000733954	5.69073e-13	elevated rate
21711	C	41294	122	0.00295442	6.2945e-120	elevated rate
21742	C	45726	14	0.000306172	0.0376797	elevated rate
21765	T	48359	404	0.00835418	0	elevated rate
21772	C	56142	47	0.000837163	3.62846e-22	elevated rate
21784	T	55709	128	0.00229765	1.58603e-112	elevated rate
21789	C	55327	553	0.00999512	0	elevated rate
21846	C	47891	22	0.000459377	1.16728e-05	elevated rate
22120	C	2390	4	0.00167364	0.00886273	elevated rate
22156	T	2508	4	0.0015949	0.0102835	elevated rate
22271	A	2325	4	0.00172043	0.00816695	elevated rate
22275	T	2583	5	0.00193573	0.00104985	elevated rate
22301	A	8948	12	0.00134108	1.78966e-07	elevated rate
22332	G	14629	8	0.000546859	0.015069	elevated rate
22482	C	11906	164	0.0137746	2.98851e-269	elevated rate
22530	C	5943	5	0.000841326	0.0255334	elevated rate
22987	C	9647	6	0.000621955	0.0340568	elevated rate
23086	C	13925	8	0.000574506	0.0117192	elevated rate
23103	C	10577	8	0.000756358	0.00251519	elevated rate
23165	A	13645	7	0.000513008	0.0388579	elevated rate
23170	C	14258	9	0.000631225	0.00318738	elevated rate
23191	C	24181	34	0.00140606	1.24709e-22	elevated rate
23216	C	26585	12	0.000451382	0.0045777	elevated rate
23230	C	32459	30	0.000924243	4.36823e-15	elevated rate
23252	C	35100	12	0.00034188	0.0340115	elevated rate
23277	C	42341	33	0.000779386	1.46529e-14	elevated rate
23280	C	43726	17	0.000388785	0.00144144	elevated rate
23297	C	45639	14	0.000306755	0.0371827	elevated rate
23298	C	45608	19	0.000416594	0.00024866	elevated rate
23308	T	47211	17	0.000360086	0.00321499	elevated rate
23325	C	45599	15	0.000328955	0.0156212	elevated rate
23334	C	47454	18	0.000379315	0.00122201	elevated rate
23410	C	43414	15	0.000345511	0.0103611	elevated rate
23444	C	35792	14	0.000391149	0.00534692	elevated rate
23465	G	26473	11	0.000415518	0.0140138	elevated rate
23469	A	19675	27	0.0013723	1.29943e-17	elevated rate
23475	C	18365	10	0.000544514	0.00398756	elevated rate
23481	C	17620	9	0.000510783	0.0117192	elevated rate
23483	A	17745	13	0.000732601	2.88369e-05	elevated rate
23485	T	17850	12	0.000672269	0.000168251	elevated rate
23487	T	18459	10	0.000541741	0.00413318	elevated rate
23492	C	19441	9	0.000462939	0.0202405	elevated rate
23522	G	19792	9	0.000454729	0.0223098	elevated rate
23526	A	18916	30	0.00158596	2.40298e-21	elevated rate
23538	C	18415	8	0.000434428	0.0472753	elevated rate
23540	T	18318	14	0.000764276	6.79996e-06	elevated rate
23582	T	12145	17	0.00139975	4.80409e-11	elevated rate
23595	C	10586	6	0.000566786	0.0475701	elevated rate
23607	G	9681	149	0.015391	9.3101e-252	elevated rate
23608	G	9566	8	0.000836295	0.00132776	elevated rate
23609	C	9381	25	0.00266496	6.34523e-23	elevated rate
23618	A	6905	319	0.0461984	0	elevated rate
23635	C	4350	13	0.00298851	2.94918e-12	elevated rate
23678	G	3349	9	0.00268737	6.04823e-08	elevated rate
23709	C	3911	4	0.00102276	0.0384696	elevated rate
23713	T	3860	4	0.00103627	0.0371827	elevated rate
23731	C	3521	4	0.00113604	0.0284877	elevated rate
23746	A	3648	19	0.00520833	1.45589e-22	elevated rate
23816	C	3929	4	0.00101807	0.0388603	elevated rate
23868	G	3280	7	0.00213415	1.72918e-05	elevated rate
23921	C	2718	4	0.00147167	0.0129984	elevated rate
23972	C	2380	5	0.00210084	0.000737583	elevated rate
24020	G	2829	4	0.00141393	0.0147773	elevated rate
24089	G	3366	6	0.00178253	0.000282873	elevated rate
24112	T	2837	5	0.00176243	0.00150465	elevated rate
24119	C	4339	53	0.0122148	1.39218e-83	elevated rate
24146	C	13949	8	0.000573518	0.011752	elevated rate
24237	C	19427	18	0.000926546	6.89568e-09	elevated rate
24263	C	18205	8	0.00043944	0.0449562	elevated rate
24285	G	18612	11	0.000591017	0.00109549	elevated rate
24291	G	19917	16	0.000803334	4.71781e-07	elevated rate
24320	C	17590	14	0.000795907	4.24766e-06	elevated rate
24333	C	17459	8	0.000458216	0.0372845	elevated rate
24373	A	13799	9	0.000652221	0.00260053	elevated rate
24399	G	12642	10	0.000791014	0.000269818	elevated rate
24435	C	10307	6	0.000582129	0.0436028	elevated rate
24517	C	5226	5	0.000956755	0.0160961	elevated rate
24521	G	4965	7	0.00140987	0.000211442	elevated rate
24532	A	4872	7	0.00143678	0.000190777	elevated rate
24566	C	7557	7	0.000926294	0.00217489	elevated rate
24590	C	7195	5	0.000694927	0.0478319	elevated rate
24672	C	4860	5	0.00102881	0.0123087	elevated rate
24693	G	918	6	0.00653595	2.58261e-07	elevated rate
24720	C	1363	27	0.0198092	8.82049e-48	elevated rate
24803	A	3409	9	0.00264007	6.97901e-08	elevated rate
24990	C	13348	198	0.0148337	0	elevated rate
25047	C	16509	11	0.000666303	0.000417603	elevated rate
25100	C	13268	16	0.00120591	1.92706e-09	elevated rate
25141	A	14033	8	0.000570085	0.0120875	elevated rate
25163	C	13276	13	0.000979211	1.31395e-06	elevated rate
25184	C	12388	9	0.00072651	0.00127806	elevated rate
25219	T	10762	9	0.000836276	0.000487696	elevated rate
25254	C	3244	9	0.00277435	4.6384e-08	elevated rate
25384	A	2580	5	0.00193798	0.00104645	elevated rate
25387	G	2826	4	0.00141543	0.0147385	elevated rate
25403	T	3001	35	0.0116628	3.32486e-54	elevated rate
25416	C	4006	4	0.000998502	0.040792	elevated rate
25441	C	5652	6	0.00106157	0.00339244	elevated rate
25460	C	6284	5	0.000795672	0.0309616	elevated rate
25470	A	6268	6	0.000957243	0.00534692	elevated rate
25472	A	6212	5	0.000804894	0.0295596	elevated rate
25532	T	13073	7	0.000535455	0.0321218	elevated rate
25546	C	12952	9	0.000694873	0.00170006	elevated rate
25549	C	12619	11	0.000871701	4.23797e-05	elevated rate
25555	G	12482	9	0.000721038	0.00131449	elevated rate
25572	C	11322	12	0.00105988	1.98348e-06	elevated rate
25587	C	16831	13	0.000772384	1.67087e-05	elevated rate
25603	C	16993	11	0.000647325	0.000525236	elevated rate
25604	T	17156	27	0.00157379	4.60554e-19	elevated rate
25605	A	18215	33	0.00181169	2.84578e-25	elevated rate
25606	G	18318	44	0.00240201	5.8696e-39	elevated rate
25621	G	19146	28	0.00146245	5.5211e-19	elevated rate
25624	C	19081	9	0.000471673	0.0180792	elevated rate
25703	C	15406	11	0.000714008	0.00023674	elevated rate
25708	C	14837	8	0.000539193	0.016217	elevated rate
25710	C	14550	11	0.000756014	0.000150212	elevated rate
25721	C	11984	8	0.000667557	0.00497788	elevated rate
25826	A	3133	4	0.00127673	0.019943	elevated rate
26057	A	941	3	0.0031881	0.00893833	elevated rate
26111	C	786	3	0.00381679	0.0056619	elevated rate
26261	C	6384	31	0.00485589	2.44311e-36	elevated rate
26267	A	6445	11	0.00170675	7.81912e-08	elevated rate
26282	T	12053	8	0.000663735	0.00512419	elevated rate
26300	T	13366	9	0.00067335	0.00211901	elevated rate
26304	T	13599	7	0.000514744	0.038365	elevated rate
26333	C	14898	36	0.00241643	7.61869e-32	elevated rate
26340	C	14918	8	0.000536265	0.0165021	elevated rate
26388	C	14949	8	0.000535153	0.0166354	elevated rate
26416	G	16395	13	0.000792925	1.27416e-05	elevated rate
26447	C	16075	11	0.000684292	0.00033911	elevated rate
26466	G	14950	13	0.000869565	4.70493e-06	elevated rate
26467	G	15233	12	0.000787763	3.78222e-05	elevated rate
26493	G	14646	11	0.000751058	0.000158843	elevated rate
26527	C	11760	13	0.00110544	3.45889e-07	elevated rate
26528	A	11561	20	0.00172995	9.61875e-15	elevated rate
26530	A	10534	6	0.000569584	0.0472753	elevated rate
26534	C	8884	9	0.00101306	0.000128872	elevated rate
26541	A	7792	11	0.0014117	4.73291e-07	elevated rate
26544	A	6339	5	0.000788768	0.0320297	elevated rate
26561	T	8090	7	0.000865266	0.00311029	elevated rate
26620	G	13888	25	0.00180012	5.83195e-19	elevated rate
26640	G	17239	8	0.000464064	0.0349622	elevated rate
26645	C	17367	14	0.000806127	3.66734e-06	elevated rate
26681	C	31813	47	0.00147738	1.98882e-32	elevated rate
26682	C	31669	11	0.000347343	0.0436688	elevated rate
26719	T	30279	19	0.000627498	8.69218e-07	elevated rate
26735	C	30149	17	0.000563866	1.89866e-05	elevated rate
26752	C	29248	12	0.000410284	0.00957421	elevated rate
26753	C	32015	14	0.000437295	0.00206795	elevated rate
26754	G	32214	105	0.00325945	2.03025e-107	elevated rate
26791	T	38863	14	0.00036024	0.0108513	elevated rate
26801	C	37837	15	0.000396437	0.00307292	elevated rate
26852	G	23662	17	0.000718452	7.73171e-07	elevated rate
26858	C	23427	10	0.000426858	0.0192593	elevated rate
26864	A	23317	15	0.000643307	1.90635e-05	elevated rate
26882	C	23033	15	0.00065124	1.67087e-05	elevated rate
26895	C	22198	12	0.000540589	0.00109575	elevated rate
26924	A	15459	26	0.00168187	5.00253e-19	elevated rate
27038	A	5489	12	0.00218619	9.22192e-10	elevated rate
27039	T	5390	14	0.0025974	1.93214e-12	elevated rate
27040	C	5308	16	0.00301432	2.76047e-15	elevated rate
27122	G	2341	5	0.00213584	0.00069641	elevated rate
27127	G	3175	4	0.00125984	0.0206615	elevated rate
27131	C	3123	6	0.00192123	0.000195458	elevated rate
27155	C	2013	10	0.00496771	2.16766e-11	elevated rate
27448	C	1139	3	0.00263389	0.0139624	elevated rate
27451	T	1803	17	0.00942873	2.28222e-24	elevated rate
27476	C	34612	15	0.000433376	0.00129474	elevated rate
27493	C	37242	19	0.000510177	1.70646e-05	elevated rate
27509	C	37867	16	0.000422531	0.00100652	elevated rate
27532	C	38818	16	0.00041218	0.00129214	elevated rate
27575	C	41225	16	0.000388114	0.00239775	elevated rate
27577	C	41159	14	0.000340144	0.0166664	elevated rate
27600	C	29782	18	0.000604392	3.39127e-06	elevated rate
27641	C	31207	12	0.000384529	0.0151731	elevated rate
27644	C	31080	11	0.000353925	0.0393619	elevated rate
27663	A	20473	9	0.000439603	0.0273742	elevated rate
27697	C	13630	7	0.000513573	0.0386984	elevated rate
27741	C	8954	7	0.000781774	0.00512116	elevated rate
27758	G	8065	6	0.000743955	0.0162668	elevated rate
27760	T	8094	7	0.000864838	0.00311395	elevated rate
27761	T	8120	15	0.00184729	2.54434e-11	elevated rate
27791	C	6535	19	0.00290742	5.74136e-18	elevated rate
27804	C	6866	5	0.000728226	0.0414411	elevated rate
27807	C	6820	7	0.00102639	0.00125227	elevated rate
27836	C	5193	5	0.000962835	0.0157472	elevated rate
27847	C	8013	6	0.000748783	0.015873	elevated rate
27876	T	8799	9	0.00102284	0.00012081	elevated rate
27877	G	8803	9	0.00102238	0.000120878	elevated rate
27879	C	8762	11	0.00125542	1.46148e-06	elevated rate
27883	C	8746	11	0.00125772	1.44094e-06	elevated rate
27889	C	9106	10	0.00109818	1.89866e-05	elevated rate
27896	G	9056	7	0.000772968	0.0053969	elevated rate
27908	T	9197	7	0.000761118	0.00587319	elevated rate
27920	C	9321	8	0.000858277	0.00116274	elevated rate
27922	T	9836	25	0.00254168	1.90283e-22	elevated rate
27924	A	9811	475	0.048415	0	elevated rate
28001	G	8706	6	0.00068918	0.0221726	elevated rate
28022	T	6453	15	0.0023245	1.07123e-12	elevated rate
28037	A	26927	15	0.000557062	0.000100796	elevated rate
28054	C	48069	36	0.000748923	2.11446e-15	elevated rate
28087	C	48912	15	0.000306673	0.0275393	elevated rate
28093	C	47171	22	0.000466388	9.22181e-06	elevated rate
28107	C	47716	15	0.00031436	0.0223	elevated rate
28146	C	53695	17	0.000316603	0.0112579	elevated rate
28147	C	53375	18	0.000337237	0.00421298	elevated rate
28165	A	53361	25	0.000468507	1.30739e-06	elevated rate
28214	C	39793	23	0.000577991	1.29774e-07	elevated rate
28242	G	42475	18	0.000423779	0.000341641	elevated rate
28250	T	46349	60	0.00129453	1.93097e-38	elevated rate
28251	T	45769	32	0.000699163	7.55499e-13	elevated rate
28253	C	44841	51	0.00113735	5.13104e-30	elevated rate
28310	C	57711	21	0.000363882	0.000536757	elevated rate
28311	C	57028	21	0.00036824	0.000459272	elevated rate
28312	C	57498	17	0.000295662	0.020417	elevated rate
28320	C	57853	22	0.000380274	0.000194786	elevated rate
28321	G	57963	16	0.000276038	0.0466273	elevated rate
28332	C	58454	50	0.000855373	5.27525e-24	elevated rate
28362	G	58373	152	0.00260394	1.17934e-141	elevated rate
28383	C	67601	24	0.000355024	0.000217042	elevated rate
28391	C	65373	21	0.000321234	0.00254642	elevated rate
28393	T	64829	0	0	0.0409387	reduced rate
28396	G	65191	18	0.000276112	0.0287585	elevated rate
28399	C	65174	0	0	0.0414411	reduced rate
28404	G	61186	21	0.000343216	0.00113377	elevated rate
28406	T	60934	86	0.00141136	2.35238e-58	elevated rate
28407	T	60726	51	0.000839838	3.81885e-24	elevated rate
28411	C	60446	27	0.00044668	9.36293e-07	elevated rate
28423	G	57461	18	0.000313256	0.00893833	elevated rate
28431	T	64799	0	0	0.0409158	reduced rate
28432	C	64404	30	0.00046581	6.64219e-08	elevated rate
28435	C	64403	44	0.000683198	1.71941e-17	elevated rate
28448	C	61920	20	0.000322997	0.00332428	elevated rate
28467	A	63577	0	0	0.0396287	reduced rate
28498	C	64922	36	0.000554512	1.3084e-11	elevated rate
28499	A	64719	0	0	0.0408154	reduced rate
28507	C	65281	32	0.000490189	5.60273e-09	elevated rate
28512	C	60839	17	0.000279426	0.0334792	elevated rate
28531	C	59518	22	0.000369636	0.000285148	elevated rate
28535	C	59129	19	0.000321331	0.00486611	elevated rate
28556	C	59094	19	0.000321522	0.00483792	elevated rate
28601	T	51173	32	0.00062533	1.35697e-11	elevated rate
28650	A	54915	50	0.000910498	3.6014e-25	elevated rate
28651	C	54653	19	0.000347648	0.00212529	elevated rate
28668	G	58576	108	0.00184376	4.46337e-85	elevated rate
28669	G	59339	24	0.000404456	2.88369e-05	elevated rate
28677	C	75612	21	0.000277734	0.0175189	elevated rate
28678	T	75491	53	0.00070207	1.14464e-21	elevated rate
28695	C	77688	45	0.00057924	2.71187e-15	elevated rate
28698	C	77157	59	0.000764675	5.85263e-26	elevated rate
28706	C	78573	22	0.000279994	0.0128632	elevated rate
28708	C	78774	20	0.000253891	0.040792	elevated rate
28710	T	78882	0	0	0.00870692	reduced rate
28712	G	79237	0	0	0.00872991	reduced rate
28721	A	79965	0	0	0.00886273	reduced rate
28725	C	81690	31	0.000379483	2.82597e-06	elevated rate
28726	T	81693	1	1.2241e-05	0.0472753	reduced rate
28732	C	82165	30	0.000365119	9.88673e-06	elevated rate
28733	A	82491	0	0	0.00631906	reduced rate
28735	T	82046	0	0	0.0062856	reduced rate
28738	T	82070	1	1.21847e-05	0.0472895	reduced rate
28741	A	79645	44	0.000552452	3.11503e-14	elevated rate
28744	C	79666	23	0.000288705	0.0047573	elevated rate
28748	C	79614	31	0.000389379	1.65471e-06	elevated rate
28755	T	72204	0	0	0.0159319	reduced rate
28766	A	74569	0	0	0.0166398	reduced rate
28768	A	75173	0	0	0.011752	reduced rate
28774	G	73648	0	0	0.0163027	reduced rate
28776	C	73141	58	0.000792989	2.79622e-26	elevated rate
28779	A	72833	0	0	0.0160586	reduced rate
28791	C	70925	30	0.000422982	4.95642e-07	elevated rate
28801	C	64470	27	0.000418799	3.14734e-06	elevated rate
28826	C	99146	43	0.000433704	1.62528e-10	elevated rate
28836	C	122555	335	0.00273347	2.458e-320	elevated rate
28837	A	123444	2	1.62017e-05	0.00743224	reduced rate
28844	C	124121	43	0.000346436	1.23613e-07	elevated rate
28849	C	124608	44	0.000353107	4.68189e-08	elevated rate
28854	C	124250	191	0.00153722	4.03627e-137	elevated rate
28859	A	126297	3	2.37535e-05	0.0206011	reduced rate
28862	T	125919	3	2.38248e-05	0.020582	reduced rate
28863	C	123509	31	0.000250994	0.00480119	elevated rate
28864	A	125359	1	7.97709e-06	0.00111108	reduced rate
28865	A	125432	3	2.39173e-05	0.0205598	reduced rate
28866	C	125653	41	0.000326295	1.30344e-06	elevated rate
28867	T	125130	3	2.39751e-05	0.0205598	reduced rate
28868	C	125154	82	0.000655193	9.05475e-32	elevated rate
28870	A	124414	2	1.60754e-05	0.00766151	reduced rate
28877	A	127439	1	7.84689e-06	0.000794207	reduced rate
28879	T	128255	2	1.55939e-05	0.00407397	reduced rate
28882	G	130547	2	1.53202e-05	0.00421298	reduced rate
28886	A	133125	4	3.00469e-05	0.0394269	reduced rate
28887	C	133896	298	0.00222561	1.99443e-259	elevated rate
28888	T	133906	1	7.46793e-06	0.000424319	reduced rate
28889	T	133465	2	1.49852e-05	0.00318738	reduced rate
28891	T	134136	1	7.45512e-06	0.000424655	reduced rate
28894	T	139761	2	1.43101e-05	0.00176215	reduced rate
28897	T	139972	46	0.000328637	1.62648e-07	elevated rate
28898	A	140645	71	0.000504817	4.3229e-21	elevated rate
28904	G	138401	4	2.89015e-05	0.0321218	reduced rate
28910	A	133499	104	0.000779032	5.6508e-47	elevated rate
28912	T	133697	3	2.24388e-05	0.0124359	reduced rate
28913	G	135248	1	7.39382e-06	0.000436204	reduced rate
28919	G	149041	5	3.35478e-05	0.0340115	reduced rate
28920	A	148690	5	3.3627e-05	0.0340115	reduced rate
28921	T	148259	5	3.37248e-05	0.0437929	reduced rate
28924	T	148663	5	3.36331e-05	0.0340115	reduced rate
28929	T	148870	0	0	9.2641e-06	reduced rate
28930	T	148813	0	0	9.2641e-06	reduced rate
28931	G	149066	3	2.01253e-05	0.00318738	reduced rate
28932	C	149007	39	0.000261733	0.000402983	elevated rate
28934	T	149506	2	1.33774e-05	0.00072492	reduced rate
28935	T	149730	2	1.33574e-05	0.00072492	reduced rate
28938	T	149781	5	3.33821e-05	0.0341516	reduced rate
28941	T	149803	2	1.33509e-05	0.00072492	reduced rate
28944	T	150442	3	1.99412e-05	0.00321499	reduced rate
28947	A	129236	2	1.54756e-05	0.00410672	reduced rate
28949	A	129723	2	1.54175e-05	0.00413318	reduced rate
28951	A	124858	2	1.60182e-05	0.0053604	reduced rate
28952	T	124991	3	2.40017e-05	0.028255	reduced rate
28953	T	124292	2	1.60911e-05	0.00763517	reduced rate
28955	A	120538	3	2.48884e-05	0.035328	reduced rate
28956	A	120814	1	8.27719e-06	0.00144555	reduced rate
28961	C	119586	51	0.000426471	2.94918e-12	elevated rate
28962	T	118560	1	8.43455e-06	0.00204692	reduced rate
28969	C	111947	47	0.000419842	4.73314e-11	elevated rate
28973	A	103657	1	9.6472e-06	0.00646135	reduced rate
28974	T	104945	1	9.5288e-06	0.00652817	reduced rate
28979	G	116097	2	1.7227e-05	0.0126413	reduced rate
28982	A	118655	3	2.52834e-05	0.034607	reduced rate
28984	A	117427	1	8.51593e-06	0.00201072	reduced rate
28986	G	118242	3	2.53717e-05	0.0346008	reduced rate
28992	A	120468	3	2.49029e-05	0.0353037	reduced rate
28995	A	120719	3	2.48511e-05	0.0354601	reduced rate
28998	A	119084	0	0	0.000193836	reduced rate
29004	A	123807	1	8.07709e-06	0.00108669	reduced rate
29012	A	119494	2	1.67372e-05	0.00971113	reduced rate
29013	C	118844	32	0.000269261	0.00126926	elevated rate
29014	T	119361	3	2.51338e-05	0.0347565	reduced rate
29018	A	119749	1	8.3508e-06	0.00212615	reduced rate
29019	A	118998	2	1.6807e-05	0.00966024	reduced rate
29025	C	107605	56	0.000520422	4.04074e-17	elevated rate
29029	T	105832	0	0	0.000702637	reduced rate
29030	G	112941	0	0	0.000374332	reduced rate
29035	T	113047	1	8.84588e-06	0.00381	reduced rate
29049	G	113684	1	8.79631e-06	0.00269408	reduced rate
29051	C	113687	138	0.00121386	7.15422e-86	elevated rate
29054	A	114930	2	1.74019e-05	0.0125462	reduced rate
29062	T	109079	2	1.83353e-05	0.0215675	reduced rate
29067	C	108011	51	0.000472174	6.50178e-14	elevated rate
29069	A	107865	29	0.000268855	0.00276498	elevated rate
29071	A	106745	0	0	0.00072492	reduced rate
29075	T	106359	26	0.000244455	0.0188617	elevated rate
29077	C	105329	75	0.000712055	2.97763e-31	elevated rate
29080	T	105613	25	0.000236713	0.0403862	elevated rate
29085	C	106940	58	0.00054236	1.55261e-18	elevated rate
29089	A	107041	2	1.86844e-05	0.0291394	reduced rate
29091	C	107149	27	0.000251986	0.011752	elevated rate
29095	C	104931	75	0.000714755	2.38244e-31	elevated rate
29099	A	102006	0	0	0.000961246	reduced rate
29101	A	100408	2	1.99187e-05	0.0480303	reduced rate
29112	A	78221	26	0.000332392	0.000265849	elevated rate
29149	C	55337	21	0.000379493	0.000313896	elevated rate
29160	C	54950	16	0.000291174	0.0309158	elevated rate
29167	C	56567	17	0.000300529	0.0175111	elevated rate
29171	C	54999	25	0.000454554	2.21067e-06	elevated rate
29200	C	59068	33	0.000558678	1.05203e-10	elevated rate
29208	C	59969	17	0.00028348	0.0293677	elevated rate
29218	C	54641	16	0.00029282	0.0293838	elevated rate
29220	G	56842	26	0.000457408	1.09568e-06	elevated rate
29242	A	81195	1	1.2316e-05	0.0471742	reduced rate
29246	A	81946	1	1.22032e-05	0.0472895	reduced rate
29247	C	81365	47	0.000577644	6.02722e-16	elevated rate
29248	A	81133	0	0	0.00923669	reduced rate
29253	C	79744	51	0.000639547	3.95938e-19	elevated rate
29258	A	81112	1	1.23286e-05	0.0471742	reduced rate
29267	A	88225	0	0	0.00337038	reduced rate
29271	A	88527	1	1.1296e-05	0.0279185	reduced rate
29274	C	88324	39	0.000441556	1.02001e-09	elevated rate
29282	A	86395	1	1.15747e-05	0.0380267	reduced rate
29284	C	86043	26	0.000302174	0.00109575	elevated rate
29290	G	85821	1	1.16522e-05	0.0373798	reduced rate
29293	T	83533	1	1.19713e-05	0.0492967	reduced rate
29295	A	82755	1	1.20839e-05	0.0478557	reduced rate
29296	C	82722	31	0.000374749	3.66101e-06	elevated rate
29297	A	83583	1	1.19642e-05	0.04934	reduced rate
29302	T	82030	1	1.21907e-05	0.0472895	reduced rate
29304	C	81912	23	0.000280789	0.00966024	elevated rate
29305	A	82169	1	1.217e-05	0.0473161	reduced rate
29311	C	82375	43	0.000522003	4.54592e-13	elevated rate
29317	T	82490	22	0.000266699	0.0171799	elevated rate
29318	C	81949	23	0.000280662	0.00966024	elevated rate
29319	A	81925	0	0	0.0062856	reduced rate
29322	T	82919	0	0	0.00636508	reduced rate
29323	C	82592	24	0.000290585	0.00335271	elevated rate
29337	A	78354	0	0	0.00870106	reduced rate
29343	T	78326	0	0	0.00870106	reduced rate
29344	T	77878	0	0	0.0124554	reduced rate
29348	G	76949	20	0.000259912	0.0346561	elevated rate
29349	C	76980	26	0.00033775	0.000209024	elevated rate
29352	A	77627	0	0	0.0123398	reduced rate
29353	C	76369	96	0.00125705	7.77195e-61	elevated rate
29358	C	74850	31	0.000414162	4.56226e-07	elevated rate
29363	C	72368	20	0.000276365	0.0239782	elevated rate
29366	C	62701	18	0.000287077	0.0200744	elevated rate
29367	C	62384	26	0.000416774	5.95867e-06	elevated rate
29370	C	64593	35	0.000541854	5.08605e-11	elevated rate
29377	T	63160	23	0.000364155	0.000228611	elevated rate
29386	C	58772	35	0.000595522	3.93907e-12	elevated rate
29441	C	57067	18	0.000315419	0.00840415	elevated rate
29445	C	56430	16	0.000283537	0.0383499	elevated rate
29451	C	49979	16	0.000320134	0.0139265	elevated rate
29466	C	52886	18	0.000340355	0.00382859	elevated rate
29536	T	38632	18	0.000465935	0.000111711	elevated rate
29541	C	37473	15	0.000400288	0.00278931	elevated rate
29555	C	30681	40	0.00130374	1.57256e-25	elevated rate
29580	C	11012	12	0.00108972	1.48739e-06	elevated rate
29702	G	3210	6	0.00186916	0.000223374	elevated rate
29774	C	4203	5	0.00118963	0.00711463	elevated rate

## Sheet: Sup. Table 3
POS	REF	adj.depth	all	all.rate	all.adj.p.value	type					Supplementary Table 3
71	C	674	3	0.00445104	0.00612309	elevated rate
123	C	32706	22	0.000672659	1.13205e-06	elevated rate
124	G	32915	13	0.000394957	0.0427293	elevated rate
129	A	59185	0	0	0.00971217	reduced rate
136	A	59837	1	1.67121e-05	0.0495139	reduced rate
137	T	59823	1	1.6716e-05	0.0495139	reduced rate
138	A	60465	1	1.65385e-05	0.0499895	reduced rate
142	A	60581	1	1.65068e-05	0.0499895	reduced rate
145	T	60562	1	1.6512e-05	0.0499895	reduced rate
157	C	60967	32	0.000524874	3.07273e-07	elevated rate
161	A	62846	0	0	0.00516555	reduced rate
163	A	62912	0	0	0.00516555	reduced rate
168	T	63057	1	1.58587e-05	0.0390753	reduced rate
169	A	63198	0	0	0.00516555	reduced rate
170	A	63020	0	0	0.00516555	reduced rate
172	T	63176	1	1.58288e-05	0.0391059	reduced rate
175	T	63049	0	0	0.00516555	reduced rate
177	T	63189	1	1.58255e-05	0.0391059	reduced rate
179	T	63161	0	0	0.00516555	reduced rate
182	T	63105	1	1.58466e-05	0.0390888	reduced rate
186	C	62761	22	0.000350536	0.0133003	elevated rate
187	A	62951	1	1.58854e-05	0.0389785	reduced rate
194	T	63158	0	0	0.00516555	reduced rate
196	A	63191	1	1.5825e-05	0.0391059	reduced rate
198	G	63393	0	0	0.00517526	reduced rate
200	T	63259	0	0	0.00516742	reduced rate
203	C	63229	27	0.000427019	0.000161171	elevated rate
211	T	63354	1	1.57843e-05	0.0392687	reduced rate
212	T	63321	1	1.57925e-05	0.0392396	reduced rate
215	A	63434	0	0	0.00517526	reduced rate
222	C	63634	36	0.000565735	5.70863e-09	elevated rate
226	A	63515	1	1.57443e-05	0.0394473	reduced rate
231	A	63469	0	0	0.00517526	reduced rate
253	A	45600	0	0	0.0413749	reduced rate
297	A	45589	0	0	0.0413749	reduced rate
300	C	45181	29	0.000641863	2.28844e-08	elevated rate
311	C	44856	56	0.00124844	1.59803e-29	elevated rate
312	T	45169	0	0	0.0413749	reduced rate
316	T	45273	0	0	0.0413749	reduced rate
317	T	45524	0	0	0.0413749	reduced rate
322	T	45478	0	0	0.0413749	reduced rate
326	T	45514	0	0	0.0413749	reduced rate
328	A	45338	0	0	0.0413749	reduced rate
335	C	44326	19	0.000428642	0.00312852	elevated rate
344	C	43162	30	0.000695056	1.88909e-09	elevated rate
346	C	43797	36	0.000821974	1.93011e-13	elevated rate
353	G	48948	0	0	0.0327515	reduced rate
386	G	54640	0	0	0.0185179	reduced rate
393	G	57785	0	0	0.00948827	reduced rate
395	C	58095	26	0.000447543	0.000109438	elevated rate
399	A	59377	1	1.68415e-05	0.0492914	reduced rate
400	T	59400	1	1.6835e-05	0.0492914	reduced rate
402	T	64869	1	1.54157e-05	0.0297879	reduced rate
404	A	65191	0	0	0.00371563	reduced rate
413	A	65560	1	1.52532e-05	0.0302012	reduced rate
417	G	65792	21	0.000319188	0.0440566	elevated rate
423	T	65756	1	1.52077e-05	0.0303978	reduced rate
429	A	66551	0	0	0.00386566	reduced rate
432	T	67108	1	1.49014e-05	0.022454	reduced rate
434	G	71060	31	0.000436251	2.31698e-05	elevated rate
436	A	57957	28	0.000483117	1.19109e-05	elevated rate
438	A	58884	0	0	0.00963902	reduced rate
443	G	61523	84	0.00136534	2.4429e-47	elevated rate
445	T	63094	1	1.58494e-05	0.0390888	reduced rate
446	T	75151	1	1.33065e-05	0.00948827	reduced rate
447	T	75061	1	1.33225e-05	0.00948827	reduced rate
451	T	74391	24	0.00032262	0.0220858	elevated rate
453	A	74325	2	2.69088e-05	0.0499895	reduced rate
454	A	74030	2	2.70161e-05	0.0497828	reduced rate
456	T	74290	2	2.69215e-05	0.0499895	reduced rate
457	T	74174	2	2.69636e-05	0.0499167	reduced rate
459	A	74058	0	0	0.00141625	reduced rate
460	A	74006	2	2.70248e-05	0.0497745	reduced rate
462	A	73877	54	0.000730945	4.78844e-18	elevated rate
467	T	74490	1	1.34246e-05	0.00948827	reduced rate
474	T	74423	1	1.34367e-05	0.00948827	reduced rate
476	A	75554	1	1.32356e-05	0.00954647	reduced rate
477	T	75879	2	2.63578e-05	0.0386973	reduced rate
479	A	75706	0	0	0.000978944	reduced rate
481	A	75088	1	1.33177e-05	0.00948827	reduced rate
484	T	75495	36	0.000476853	3.9583e-07	elevated rate
490	T	76006	1	1.31569e-05	0.00965817	reduced rate
493	T	73193	2	2.7325e-05	0.0492282	reduced rate
496	A	72758	2	2.74884e-05	0.0489831	reduced rate
497	A	72595	0	0	0.00136078	reduced rate
499	T	72560	0	0	0.00136078	reduced rate
502	A	70844	1	1.41155e-05	0.0174848	reduced rate
504	C	70149	50	0.000712769	2.7856e-16	elevated rate
506	C	69558	66	0.000948848	3.63441e-28	elevated rate
507	A	68695	111	0.00161584	5.8403e-70	elevated rate
508	T	69068	22	0.000318527	0.0369112	elevated rate
509	G	68398	1073	0.0156876	0	elevated rate
511	T	67480	1	1.48192e-05	0.0225024	reduced rate
512	C	67553	51	0.000754963	1.31933e-17	elevated rate
513	A	66987	29	0.00043292	5.79905e-05	elevated rate
514	T	67081	190	0.0028324	3.06537e-163	elevated rate
515	G	66700	250	0.00374813	4.86959e-244	elevated rate
517	T	66251	522	0.00787913	0	elevated rate
518	A	65543	95	0.00144943	8.75606e-56	elevated rate
520	G	65432	33	0.00050434	4.48571e-07	elevated rate
528	T	63214	1	1.58193e-05	0.0391139	reduced rate
531	T	61825	1	1.61747e-05	0.0384631	reduced rate
532	A	61447	63	0.00102527	1.22161e-28	elevated rate
538	A	59907	0	0	0.0101154	reduced rate
539	C	60043	24	0.000399714	0.00129572	elevated rate
540	T	58348	0	0	0.0095239	reduced rate
543	A	57535	0	0	0.00948827	reduced rate
554	T	54707	0	0	0.0185795	reduced rate
567	G	36112	19	0.000526141	0.000260953	elevated rate
579	G	16023	9	0.000561693	0.0245184	elevated rate
593	C	17283	9	0.000520743	0.0369112	elevated rate
602	G	17382	10	0.000575308	0.0128763	elevated rate
609	C	15712	18	0.00114562	9.07252e-09	elevated rate
645	G	19047	37	0.00194256	9.16055e-26	elevated rate
683	C	18072	18	0.000996016	7.62148e-08	elevated rate
685	A	18742	450	0.0240102	0	elevated rate
715	C	17571	11	0.000626032	0.00419352	elevated rate
763	C	4191	7	0.00167025	0.000254602	elevated rate
817	C	4584	19	0.00414485	6.89779e-19	elevated rate
829	C	11265	7	0.000621394	0.0421993	elevated rate
855	C	12677	8	0.000631064	0.0231962	elevated rate
857	C	12670	11	0.000868193	0.000300067	elevated rate
897	C	21722	17	0.000782617	5.36456e-06	elevated rate
917	C	20970	14	0.00066762	0.000334164	elevated rate
1014	A	25171	23	0.00091375	2.24753e-09	elevated rate
1026	C	24642	11	0.000446392	0.0389212	elevated rate
1077	C	17544	10	0.000569995	0.013507	elevated rate
1102	C	20144	13	0.000645353	0.000903927	elevated rate
1165	T	13816	9	0.000651419	0.0105259	elevated rate
1190	C	12120	12	0.000990099	3.51169e-05	elevated rate
1191	C	12034	11	0.000914077	0.000192381	elevated rate
1214	C	9183	7	0.000762278	0.0175925	elevated rate
1228	G	3148	9	0.00285896	1.89168e-07	elevated rate
1245	G	9662	8	0.000827986	0.00539203	elevated rate
1254	C	11837	44	0.00371716	2.79197e-42	elevated rate
1259	C	13438	14	0.00104182	2.56189e-06	elevated rate
1276	T	27311	13	0.000475999	0.0117112	elevated rate
1288	C	33188	22	0.00066289	1.43213e-06	elevated rate
1332	C	40678	15	0.00036875	0.0405667	elevated rate
1349	C	43526	21	0.00048247	0.000311008	elevated rate
1363	T	45098	29	0.000643044	2.20276e-08	elevated rate
1367	A	45427	19	0.000418253	0.00410364	elevated rate
1386	A	45345	0	0	0.0413749	reduced rate
1421	G	41890	15	0.000358081	0.0495599	elevated rate
1427	C	44497	16	0.000359575	0.0385358	elevated rate
1453	T	46342	0	0	0.0419564	reduced rate
1456	T	45653	0	0	0.0413851	reduced rate
1469	C	45315	25	0.000551694	5.01138e-06	elevated rate
1476	T	45100	0	0	0.0413749	reduced rate
1500	C	41766	16	0.000383087	0.0235787	elevated rate
1562	T	20154	15	0.000744269	4.9694e-05	elevated rate
1572	C	18912	21	0.00111041	5.03978e-10	elevated rate
1583	G	13533	10	0.000738934	0.00241155	elevated rate
1584	G	13577	35	0.00257789	2.59588e-28	elevated rate
1594	C	13805	10	0.000724375	0.00279593	elevated rate
1619	G	12367	10	0.000808604	0.00124613	elevated rate
1628	C	11992	16	0.00133422	1.11948e-08	elevated rate
1648	C	11400	7	0.000614035	0.0442485	elevated rate
1684	C	9805	10	0.00101989	0.000204351	elevated rate
1785	G	8805	9	0.00102215	0.000559048	elevated rate
1800	C	11949	17	0.00142271	1.19334e-09	elevated rate
1806	G	14913	34	0.00227989	8.11526e-26	elevated rate
1813	T	15560	52	0.0033419	9.45039e-48	elevated rate
1828	G	15840	30	0.00189394	1.60425e-20	elevated rate
1836	G	18093	12	0.00066324	0.0013797	elevated rate
1853	C	19601	30	0.00153053	4.95897e-18	elevated rate
1912	C	18913	13	0.000687358	0.000504714	elevated rate
1913	C	18883	15	0.000794365	2.34626e-05	elevated rate
1943	C	16479	10	0.000606833	0.00931076	elevated rate
1958	G	14047	89	0.00633587	4.20161e-106	elevated rate
2085	A	2419	28	0.011575	3.88339e-40	elevated rate
2147	C	2232	15	0.00672043	7.3933e-18	elevated rate
2173	G	3016	6	0.00198939	0.000443383	elevated rate
2174	G	3276	18	0.00549451	5.52456e-20	elevated rate
2178	G	4446	7	0.00157445	0.000362781	elevated rate
2327	T	1786	5	0.00279955	0.0004941	elevated rate
2331	G	2567	8	0.00311648	7.04405e-07	elevated rate
2334	C	3124	19	0.00608195	6.38745e-22	elevated rate
2404	A	14204	8	0.000563222	0.0395066	elevated rate
2411	T	14514	8	0.000551192	0.0429424	elevated rate
2577	G	4016	10	0.00249004	9.46219e-08	elevated rate
2604	G	3037	5	0.00164636	0.00464179	elevated rate
2610	C	3567	7	0.00196243	9.55705e-05	elevated rate
2742	G	819	8	0.00976801	1.29529e-10	elevated rate
2958	A	905	24	0.0265193	7.17231e-43	elevated rate
3053	G	761	3	0.00394218	0.00826134	elevated rate
3126	A	2535	5	0.00197239	0.00219328	elevated rate
3165	C	2077	4	0.00192585	0.0102844	elevated rate
3168	C	1809	4	0.00221117	0.00695802	elevated rate
3372	A	642	3	0.0046729	0.00539203	elevated rate
3402	T	1180	23	0.0194915	5.14271e-38	elevated rate
3411	C	1641	13	0.007922	2.49009e-16	elevated rate
3535	C	1403	4	0.00285103	0.00302303	elevated rate
3602	C	2115	4	0.00189125	0.0109602	elevated rate
3611	C	2069	8	0.0038666	1.47905e-07	elevated rate
3649	T	3154	4	0.00126823	0.0359616	elevated rate
3658	T	3388	7	0.00206612	6.93946e-05	elevated rate
3728	G	4661	5	0.00107273	0.0225627	elevated rate
3856	G	432	2	0.00462963	0.0447521	elevated rate
3876	C	3382	5	0.00147842	0.007025	elevated rate
3893	G	4075	12	0.00294479	3.66558e-10	elevated rate
3897	T	4243	5	0.00117841	0.0161986	elevated rate
4055	C	6163	18	0.00292066	2.55143e-15	elevated rate
4163	G	3845	14	0.00364109	4.08663e-13	elevated rate
4188	G	3553	9	0.00253307	5.02597e-07	elevated rate
4189	C	3511	6	0.00170891	0.000948723	elevated rate
4206	C	3852	20	0.00519211	8.93342e-22	elevated rate
4227	C	3043	5	0.00164312	0.00467805	elevated rate
4246	C	3444	5	0.0014518	0.00743592	elevated rate
4290	C	4399	5	0.00113662	0.0182652	elevated rate
4301	C	4211	6	0.00142484	0.00232651	elevated rate
4334	C	3657	8	0.00218759	9.00172e-06	elevated rate
4381	T	1442	3	0.00208044	0.0358504	elevated rate
4390	G	1083	4	0.00369344	0.00123436	elevated rate
4391	C	1274	9	0.00706436	8.99957e-11	elevated rate
4392	G	1512	3	0.00198413	0.0392396	elevated rate
4456	C	2682	7	0.00260999	1.64719e-05	elevated rate
4556	G	1298	13	0.0100154	1.31183e-17	elevated rate
4601	G	3032	11	0.00362797	3.2117e-10	elevated rate
4626	C	4647	5	0.00107596	0.0224214	elevated rate
4640	T	6999	16	0.00228604	5.06545e-12	elevated rate
4643	G	7159	27	0.00377148	5.86298e-26	elevated rate
4668	C	10644	14	0.0013153	1.70737e-07	elevated rate
4733	C	10805	18	0.0016659	2.55412e-11	elevated rate
4760	G	5638	9	0.00159631	1.98705e-05	elevated rate
4765	T	5447	7	0.00128511	0.00117249	elevated rate
5109	G	716	9	0.0125698	5.95017e-13	elevated rate
5110	T	737	6	0.00814111	1.99966e-07	elevated rate
5113	A	687	12	0.0174672	4.90723e-19	elevated rate
5125	T	2565	5	0.00194932	0.00230209	elevated rate
5127	T	2851	4	0.00140302	0.0269924	elevated rate
5130	C	4963	14	0.00282087	1.15343e-11	elevated rate
5157	C	9555	7	0.000732601	0.0210841	elevated rate
5162	G	9731	7	0.000719351	0.0230026	elevated rate
5224	T	11762	8	0.000680156	0.0158093	elevated rate
5246	G	11240	11	0.000978648	0.000104953	elevated rate
5326	G	6769	6	0.000886394	0.0192201	elevated rate
5457	C	766	5	0.00652742	1.0567e-05	elevated rate
5512	C	972	3	0.00308642	0.0145284	elevated rate
5610	G	780	3	0.00384615	0.00874813	elevated rate
5619	T	805	15	0.0186335	2.46004e-24	elevated rate
5626	T	853	26	0.0304807	4.66221e-48	elevated rate
5631	G	1014	5	0.00493097	3.88383e-05	elevated rate
5768	C	439	2	0.00455581	0.0459816	elevated rate
5801	T	1140	4	0.00350877	0.00146593	elevated rate
5842	C	3874	5	0.00129066	0.0113879	elevated rate
5934	C	5160	6	0.00116279	0.00605106	elevated rate
5979	C	4799	13	0.0027089	1.34824e-10	elevated rate
5997	C	4781	8	0.00167329	5.8428e-05	elevated rate
6003	A	5356	6	0.00112024	0.00715494	elevated rate
6011	C	5773	38	0.00658237	1.56447e-45	elevated rate
6027	C	6090	6	0.000985222	0.0123019	elevated rate
6049	T	7227	8	0.00110696	0.000922235	elevated rate
6056	G	8121	7	0.000861963	0.00963902	elevated rate
6057	T	8364	9	0.00107604	0.000387463	elevated rate
6191	A	3106	4	0.00128783	0.0343817	elevated rate
6364	G	3455	6	0.00173661	0.000873302	elevated rate
6368	G	3921	5	0.00127518	0.0119093	elevated rate
6372	T	5545	7	0.0012624	0.00129914	elevated rate
6427	T	5705	10	0.00175285	2.11208e-06	elevated rate
6457	T	4434	33	0.00744249	3.42349e-41	elevated rate
6485	G	3217	4	0.00124339	0.037978	elevated rate
6541	C	2040	7	0.00343137	2.85664e-06	elevated rate
6597	A	764	19	0.0248691	2.60644e-33	elevated rate
6759	G	463	2	0.00431965	0.0498935	elevated rate
6786	C	404	2	0.0049505	0.0412214	elevated rate
6848	C	1558	3	0.00192555	0.0413749	elevated rate
6994	A	6949	9	0.00129515	9.71733e-05	elevated rate
7017	G	12590	10	0.000794281	0.00141442	elevated rate
7038	G	15181	10	0.000658718	0.00539203	elevated rate
7195	C	9751	14	0.00143575	6.00119e-08	elevated rate
7207	T	10357	10	0.000965531	0.000315989	elevated rate
7213	G	10208	27	0.00264498	4.88264e-22	elevated rate
7239	C	11635	7	0.000601633	0.0489831	elevated rate
7307	C	12980	9	0.000693374	0.00742583	elevated rate
7329	C	12390	8	0.000645682	0.0205489	elevated rate
7571	G	2575	21	0.00815534	7.22733e-27	elevated rate
7573	C	2972	10	0.00336474	5.94292e-09	elevated rate
7587	G	3494	8	0.00228964	6.52108e-06	elevated rate
7594	C	9663	11	0.00113836	2.72408e-05	elevated rate
7660	T	9968	61	0.00611958	1.50275e-71	elevated rate
7707	T	11289	7	0.000620073	0.0425435	elevated rate
7749	C	10971	9	0.000820345	0.0025474	elevated rate
7768	C	10694	7	0.000654573	0.0347133	elevated rate
7874	C	484	4	0.00826446	6.65155e-05	elevated rate
7926	C	1147	6	0.00523104	2.36437e-06	elevated rate
7981	A	1313	36	0.0274181	3.86609e-65	elevated rate
7985	C	2669	4	0.00149869	0.0224861	elevated rate
8025	C	9488	11	0.00115936	2.31698e-05	elevated rate
8084	G	9876	7	0.000708789	0.0241867	elevated rate
8090	C	9862	7	0.000709795	0.024113	elevated rate
8139	C	11610	11	0.000947459	0.00014084	elevated rate
8160	C	10885	8	0.000734956	0.0102265	elevated rate
8163	T	10968	12	0.00109409	1.30262e-05	elevated rate
8197	A	19416	60	0.00309023	3.0304e-53	elevated rate
8228	C	34147	17	0.000497848	0.00136078	elevated rate
8247	C	35747	20	0.000559488	6.59231e-05	elevated rate
8249	G	36163	18	0.000497746	0.000843089	elevated rate
8262	C	37961	18	0.000474171	0.00147713	elevated rate
8281	C	38534	19	0.000493071	0.000593266	elevated rate
8290	C	39717	20	0.000503563	0.000280704	elevated rate
8306	G	40212	394	0.00979807	0	elevated rate
8318	C	37242	16	0.000429622	0.00893158	elevated rate
8327	C	37886	52	0.00137254	2.88297e-29	elevated rate
8357	C	37160	20	0.000538213	0.00011376	elevated rate
8376	C	33584	24	0.000714626	9.44286e-08	elevated rate
8383	T	32117	14	0.000435906	0.0160063	elevated rate
8498	G	3276	4	0.001221	0.0394118	elevated rate
8564	A	2914	4	0.00137268	0.0290328	elevated rate
8566	T	2999	29	0.00966989	2.30917e-39	elevated rate
8572	G	6831	9	0.00131752	8.57998e-05	elevated rate
8635	A	7993	12	0.00150131	5.26743e-07	elevated rate
8702	G	10670	24	0.0022493	5.33513e-18	elevated rate
8704	T	10700	8	0.000747664	0.00948827	elevated rate
8709	G	13941	8	0.000573847	0.0367095	elevated rate
8729	T	13546	10	0.000738225	0.00242701	elevated rate
8731	T	13644	162	0.0118734	3.11613e-237	elevated rate
8763	A	14877	12	0.000806614	0.000243207	elevated rate
8815	T	13152	8	0.000608273	0.0278022	elevated rate
8858	G	4209	9	0.00213828	1.96738e-06	elevated rate
8859	T	4393	78	0.0177555	2.40253e-127	elevated rate
8907	T	14293	11	0.000769608	0.000816421	elevated rate
8912	C	14905	14	0.000939282	8.37318e-06	elevated rate
8927	G	15227	12	0.000788074	0.000300832	elevated rate
8956	C	15830	11	0.000694883	0.00187698	elevated rate
8991	C	15383	9	0.000585061	0.0197754	elevated rate
9040	T	6163	9	0.00146033	3.95258e-05	elevated rate
9044	G	6033	29	0.0048069	8.13305e-31	elevated rate
9045	G	5998	81	0.0135045	1.06e-122	elevated rate
9064	T	9735	11	0.00112994	2.92063e-05	elevated rate
9072	C	10688	7	0.00065494	0.0346325	elevated rate
9081	T	11483	20	0.00174171	5.85314e-13	elevated rate
9082	A	12164	8	0.000657678	0.0186639	elevated rate
9121	A	21400	28	0.00130841	3.82991e-15	elevated rate
9470	A	10394	37	0.00355975	7.97865e-35	elevated rate
9491	C	17197	16	0.000930395	1.36269e-06	elevated rate
9512	T	16625	11	0.000661654	0.00274299	elevated rate
9549	C	19389	11	0.000567332	0.00847263	elevated rate
9573	G	19476	11	0.000564798	0.0087235	elevated rate
9627	C	15152	26	0.00171595	9.39079e-17	elevated rate
9640	T	13950	40	0.00286738	3.88556e-34	elevated rate
9681	G	3261	9	0.00275989	2.50944e-07	elevated rate
9708	T	886	4	0.00451467	0.000606968	elevated rate
9837	T	3224	5	0.00155087	0.00578729	elevated rate
9919	T	17544	36	0.00205198	7.74672e-26	elevated rate
9921	G	17749	18	0.00101414	5.83793e-08	elevated rate
9943	C	20943	11	0.000525235	0.0139748	elevated rate
9944	A	21124	10	0.000473395	0.0400116	elevated rate
9946	A	21850	14	0.000640732	0.000507661	elevated rate
9953	G	24035	20	0.00083212	1.78025e-07	elevated rate
9954	C	23981	67	0.00279388	9.64191e-57	elevated rate
9962	C	25434	30	0.00117952	4.46727e-15	elevated rate
9969	C	25709	13	0.000505659	0.00744896	elevated rate
9996	C	25820	11	0.000426026	0.0499895	elevated rate
10016	C	25491	14	0.000549213	0.00225119	elevated rate
10030	C	26877	62	0.00230681	1.19348e-47	elevated rate
10031	T	26747	44	0.00164504	8.0738e-28	elevated rate
10046	G	24920	13	0.000521669	0.00582699	elevated rate
10080	C	19589	37	0.00188882	2.37361e-25	elevated rate
10086	G	18053	106	0.0058716	4.99184e-123	elevated rate
10217	G	4324	7	0.00161887	0.000307204	elevated rate
10244	C	4593	56	0.0121925	3.95752e-82	elevated rate
10252	C	6429	13	0.00202209	4.39054e-09	elevated rate
10263	C	7053	8	0.00113427	0.000791975	elevated rate
10289	G	9234	12	0.00129955	2.31029e-06	elevated rate
10290	G	9346	12	0.00128397	2.59683e-06	elevated rate
10377	C	11295	7	0.000619743	0.0426345	elevated rate
10386	C	12822	8	0.000623928	0.0241867	elevated rate
10456	C	8503	6	0.000705633	0.0459816	elevated rate
10478	A	6346	12	0.00189095	4.78938e-08	elevated rate
10480	T	6512	7	0.00107494	0.00317903	elevated rate
10491	G	13658	8	0.000585737	0.0332216	elevated rate
10519	C	16302	10	0.000613422	0.0086866	elevated rate
10527	C	15472	11	0.000710962	0.00154856	elevated rate
10557	C	26323	14	0.000531854	0.00304628	elevated rate
10560	C	26804	15	0.000559618	0.00108525	elevated rate
10582	C	34111	15	0.000439741	0.0101771	elevated rate
10594	C	35554	18	0.000506272	0.00069436	elevated rate
10606	T	40655	16	0.000393556	0.0188271	elevated rate
10626	C	40242	15	0.000372745	0.0380273	elevated rate
10645	C	40730	15	0.000368279	0.0409942	elevated rate
10660	T	41177	47	0.00114141	3.57351e-23	elevated rate
10686	C	40338	15	0.000371858	0.0385358	elevated rate
10702	C	35804	23	0.000642386	1.2338e-06	elevated rate
10726	C	38043	25	0.000657151	2.13434e-07	elevated rate
10776	C	28644	17	0.000593493	0.000179296	elevated rate
10835	G	12195	9	0.000738007	0.00515127	elevated rate
10843	T	10048	8	0.000796178	0.00684151	elevated rate
11029	G	3515	4	0.00113798	0.0473596	elevated rate
11050	C	4997	206	0.0412247	0	elevated rate
11074	C	5386	126	0.023394	2.24868e-221	elevated rate
11083	G	5347	8	0.00149617	0.000126776	elevated rate
11095	C	5459	6	0.0010991	0.00774557	elevated rate
11156	C	2246	13	0.00578807	1.24254e-14	elevated rate
11166	C	6265	6	0.000957702	0.0138018	elevated rate
11171	C	6890	17	0.00246734	2.59027e-13	elevated rate
11175	G	7058	8	0.00113347	0.000794632	elevated rate
11181	T	9032	14	0.00155004	2.32696e-08	elevated rate
11199	C	10174	7	0.000688028	0.0280648	elevated rate
11248	G	11329	14	0.00123577	3.52159e-07	elevated rate
11259	C	16451	11	0.000668652	0.00251971	elevated rate
11273	G	17232	9	0.000522284	0.0364695	elevated rate
11279	A	16986	9	0.000529848	0.0338479	elevated rate
11282	A	16836	17	0.00100974	1.71754e-07	elevated rate
11300	C	17254	9	0.000521618	0.0367095	elevated rate
11322	C	15877	24	0.00151162	2.86874e-14	elevated rate
11328	C	18098	12	0.000663057	0.0013797	elevated rate
11436	G	7397	7	0.00094633	0.00614387	elevated rate
11460	C	4876	5	0.00102543	0.0261862	elevated rate
11491	T	11955	23	0.00192388	8.00443e-16	elevated rate
11509	T	19756	27	0.00136667	4.79365e-15	elevated rate
11511	C	20332	68	0.00334448	1.28162e-62	elevated rate
11521	G	26197	29	0.001107	6.78441e-14	elevated rate
11535	G	27455	18	0.000655618	2.67297e-05	elevated rate
11563	C	36988	35	0.000946253	8.35644e-15	elevated rate
11613	A	41892	22	0.00052516	5.60972e-05	elevated rate
11616	G	41940	21	0.000500715	0.000186925	elevated rate
11625	G	41441	16	0.000386091	0.022314	elevated rate
11628	A	41814	31	0.000741378	1.90746e-10	elevated rate
11631	T	42239	24	0.000568195	5.32176e-06	elevated rate
11645	T	41618	22	0.000528617	5.11134e-05	elevated rate
11653	C	41837	17	0.000406339	0.0102844	elevated rate
11654	T	41446	18	0.0004343	0.00393324	elevated rate
11663	C	36029	14	0.000388576	0.0369112	elevated rate
11665	C	35966	19	0.000528277	0.000248012	elevated rate
11704	C	33219	14	0.000421446	0.0205489	elevated rate
11747	C	20301	22	0.00108369	2.57739e-10	elevated rate
11758	C	9948	11	0.00110575	3.56871e-05	elevated rate
11761	G	9736	7	0.000718981	0.023049	elevated rate
11902	C	1033	3	0.00290416	0.0170583	elevated rate
11977	T	1543	6	0.00388853	1.21813e-05	elevated rate
11990	G	5658	16	0.00282785	2.17817e-13	elevated rate
12006	T	5978	11	0.00184008	2.94532e-07	elevated rate
12009	T	6660	6	0.000900901	0.0179926	elevated rate
12013	T	8837	25	0.00282901	4.58495e-21	elevated rate
12031	G	10217	14	0.00137027	1.04265e-07	elevated rate
12130	A	9466	7	0.000739489	0.0201096	elevated rate
12146	C	9061	23	0.00253835	2.41956e-18	elevated rate
12186	A	17306	10	0.000577834	0.0124904	elevated rate
12291	T	23492	210	0.00893921	4.21473e-282	elevated rate
12459	C	3081	6	0.00194742	0.000493625	elevated rate
12489	C	3399	4	0.00117682	0.0427965	elevated rate
12505	T	3574	5	0.00139899	0.00862914	elevated rate
12554	G	3691	5	0.00135465	0.00956039	elevated rate
12642	T	3191	4	0.00125353	0.0369678	elevated rate
12660	G	4448	8	0.00179856	3.60262e-05	elevated rate
12759	A	13459	10	0.000742997	0.00231588	elevated rate
12762	A	13504	14	0.00103673	2.69211e-06	elevated rate
12763	C	13415	22	0.00163996	9.25618e-14	elevated rate
12768	C	15375	179	0.0116423	1.24427e-260	elevated rate
12769	G	16228	28	0.00172541	4.13571e-18	elevated rate
12782	A	17505	9	0.000514139	0.0391059	elevated rate
12789	C	17288	9	0.000520592	0.0369112	elevated rate
12802	G	17677	10	0.000565707	0.0142057	elevated rate
12904	T	8081	7	0.000866229	0.00948827	elevated rate
12907	G	7840	41	0.00522959	3.36984e-45	elevated rate
12919	C	5102	7	0.00137201	0.000803726	elevated rate
12924	C	5136	30	0.00584112	2.40984e-34	elevated rate
13078	T	3688	72	0.0195228	1.75373e-120	elevated rate
13083	C	4265	10	0.00234467	1.63109e-07	elevated rate
13095	C	5233	6	0.00114657	0.00645692	elevated rate
13105	C	6277	7	0.00111518	0.00257795	elevated rate
13115	C	13419	9	0.000670691	0.00911522	elevated rate
13118	G	14309	8	0.000559089	0.0409942	elevated rate
13119	C	14313	9	0.000628799	0.0130846	elevated rate
13131	A	22552	336	0.0148989	0	elevated rate
13270	T	13235	9	0.000680015	0.00840701	elevated rate
13274	C	13084	8	0.000611434	0.0269924	elevated rate
13275	C	13041	10	0.000766812	0.00185226	elevated rate
13293	G	10139	20	0.00197258	6.29238e-14	elevated rate
13305	G	17796	10	0.000561924	0.0148744	elevated rate
13306	T	18353	40	0.00217948	1.10151e-29	elevated rate
13309	G	18607	17	0.000913635	6.72179e-07	elevated rate
13316	C	21454	18	0.000839004	8.84257e-07	elevated rate
13339	T	25428	28	0.00110115	2.35562e-13	elevated rate
13345	T	25583	13	0.00050815	0.00719677	elevated rate
13366	C	26562	19	0.000715308	3.84241e-06	elevated rate
13439	C	18855	25	0.00132591	1.24269e-13	elevated rate
13445	G	14529	99	0.00681396	3.98013e-121	elevated rate
13458	C	14992	9	0.00060032	0.0173566	elevated rate
13459	G	14834	23	0.00155049	6.74525e-14	elevated rate
13462	T	14433	9	0.000623571	0.0136229	elevated rate
13481	T	14323	15	0.00104727	8.43046e-07	elevated rate
13612	G	12208	9	0.000737221	0.00516555	elevated rate
13767	C	269	2	0.00743494	0.0225024	elevated rate
13771	G	421	2	0.00475059	0.0429424	elevated rate
13881	C	2550	4	0.00156863	0.0194057	elevated rate
13899	T	4235	5	0.00118064	0.0160788	elevated rate
13926	G	10488	21	0.00200229	9.2948e-15	elevated rate
13936	G	10995	122	0.011096	6.7074e-175	elevated rate
13937	T	11071	11	0.000993587	9.1815e-05	elevated rate
13954	T	13030	15	0.00115119	2.60141e-07	elevated rate
14068	C	8110	8	0.000986436	0.0019146	elevated rate
14076	C	7581	8	0.00105527	0.00125559	elevated rate
14081	G	7565	22	0.00290813	9.69542e-19	elevated rate
14091	T	7115	7	0.000983837	0.00512223	elevated rate
14092	G	7628	6	0.000786576	0.03152	elevated rate
14115	C	5702	6	0.00105226	0.00943529	elevated rate
14118	G	6157	6	0.000974501	0.0129166	elevated rate
14226	A	3038	10	0.00329164	7.29013e-09	elevated rate
14248	T	2997	23	0.00767434	7.27573e-29	elevated rate
14251	T	3069	40	0.0130336	1.37825e-59	elevated rate
14252	T	2990	4	0.00133779	0.0312851	elevated rate
14298	T	7620	13	0.00170604	3.20156e-08	elevated rate
14365	C	10108	21	0.00207756	4.62766e-15	elevated rate
14372	C	10687	7	0.000655001	0.0346325	elevated rate
14391	C	10584	8	0.000755858	0.00903961	elevated rate
14407	C	10352	14	0.0013524	1.22241e-07	elevated rate
14476	T	14806	42	0.00283669	1.12732e-35	elevated rate
14495	G	14930	10	0.000669792	0.00489468	elevated rate
14498	T	17339	69	0.00397947	1.52479e-68	elevated rate
14503	C	22852	18	0.000787677	2.15919e-06	elevated rate
14515	G	27433	14	0.000510334	0.00442224	elevated rate
14524	C	31727	28	0.000882529	4.14181e-11	elevated rate
14529	C	33632	27	0.000802807	8.22627e-10	elevated rate
14540	G	37207	17	0.000456903	0.00340576	elevated rate
14545	A	37583	22	0.000585371	1.05949e-05	elevated rate
14548	G	38539	16	0.000415164	0.0118355	elevated rate
14555	T	44635	54	0.00120981	7.71564e-28	elevated rate
14560	T	46185	0	0	0.0418449	reduced rate
14565	T	46205	0	0	0.0418449	reduced rate
14568	T	45456	0	0	0.0413749	reduced rate
14570	A	45315	0	0	0.0413749	reduced rate
14599	C	44739	35	0.000782315	1.82348e-12	elevated rate
14620	A	44802	31	0.000691933	1.00701e-09	elevated rate
14734	G	17333	9	0.000519241	0.0374703	elevated rate
14737	A	17043	14	0.000821452	3.74178e-05	elevated rate
14754	A	11975	15	0.00125261	9.11063e-08	elevated rate
14809	C	7801	6	0.000769132	0.034043	elevated rate
14813	A	7697	6	0.000779524	0.0325863	elevated rate
14850	A	6891	7	0.00101582	0.00429539	elevated rate
14860	G	6743	6	0.000889812	0.0189166	elevated rate
14867	T	7059	67	0.00949143	3.16647e-91	elevated rate
15000	T	5914	10	0.0016909	2.85664e-06	elevated rate
15017	C	6822	13	0.0019056	8.76051e-09	elevated rate
15021	T	6610	6	0.000907716	0.0175925	elevated rate
15089	C	5650	22	0.00389381	2.27489e-21	elevated rate
15157	C	10575	12	0.00113475	9.0579e-06	elevated rate
15184	A	11827	14	0.00118373	5.85522e-07	elevated rate
15185	C	11819	15	0.00126914	7.76584e-08	elevated rate
15199	G	12223	8	0.000654504	0.019083	elevated rate
15227	G	15499	88	0.00567779	8.24964e-101	elevated rate
15235	C	40524	15	0.000370151	0.0394473	elevated rate
15240	C	40075	26	0.000648784	1.39926e-07	elevated rate
15251	C	45434	17	0.000374169	0.0219847	elevated rate
15254	T	46232	0	0	0.0418574	reduced rate
15255	T	46274	0	0	0.0418964	reduced rate
15257	A	46344	0	0	0.0419564	reduced rate
15259	A	46468	18	0.000387363	0.0119213	elevated rate
15264	T	47882	0	0	0.0320715	reduced rate
15266	T	49154	0	0	0.0327515	reduced rate
15267	A	49169	0	0	0.0327515	reduced rate
15270	A	49064	0	0	0.0327515	reduced rate
15271	A	49054	0	0	0.0327515	reduced rate
15281	T	49314	0	0	0.0329801	reduced rate
15285	G	49116	0	0	0.0327515	reduced rate
15287	G	49176	0	0	0.0327515	reduced rate
15289	T	49156	0	0	0.0327515	reduced rate
15293	A	49015	0	0	0.0327515	reduced rate
15296	A	49029	0	0	0.0327515	reduced rate
15302	A	49065	0	0	0.0327515	reduced rate
15309	T	50176	0	0	0.0235787	reduced rate
15311	G	50292	0	0	0.0235787	reduced rate
15316	A	50211	0	0	0.0235787	reduced rate
15317	T	50135	0	0	0.0235787	reduced rate
15324	C	50125	22	0.000438903	0.000738344	elevated rate
15326	T	50541	0	0	0.0235787	reduced rate
15327	G	50504	0	0	0.0235787	reduced rate
15337	A	51102	0	0	0.0237831	reduced rate
15341	C	51263	18	0.00035113	0.0374396	elevated rate
15342	C	51183	20	0.000390755	0.00614387	elevated rate
15350	T	50778	0	0	0.0236534	reduced rate
15360	C	50383	19	0.000377111	0.0116054	elevated rate
15362	A	50309	0	0	0.0235787	reduced rate
15363	A	50114	0	0	0.0235787	reduced rate
15364	C	50057	18	0.00035959	0.0343182	elevated rate
15393	T	45425	0	0	0.0413749	reduced rate
15395	T	45298	0	0	0.0413749	reduced rate
15397	T	45033	0	0	0.0413749	reduced rate
15543	G	1820	7	0.00384615	1.392e-06	elevated rate
15638	G	1417	3	0.00211715	0.0343951	elevated rate
15796	C	3426	4	0.00116754	0.0437706	elevated rate
15797	T	3380	6	0.00177515	0.000785737	elevated rate
15827	A	4533	11	0.00242665	1.95314e-08	elevated rate
15830	C	4819	18	0.00373521	3.97831e-17	elevated rate
15832	A	6189	6	0.000969462	0.013164	elevated rate
15888	T	7246	7	0.00096605	0.00550196	elevated rate
15966	T	1530	3	0.00196078	0.0401288	elevated rate
15989	C	1099	3	0.00272975	0.0193862	elevated rate
16037	C	2412	4	0.00165837	0.0167097	elevated rate
16133	A	457	2	0.00437637	0.0492914	elevated rate
16149	T	445	21	0.047191	1.00611e-42	elevated rate
16153	G	1544	11	0.00712435	2.74794e-13	elevated rate
16154	T	10178	18	0.00176852	9.7003e-12	elevated rate
16156	A	10788	35	0.00324435	1.38647e-31	elevated rate
16241	T	14786	12	0.000811579	0.000230064	elevated rate
16247	C	14871	94	0.00632103	5.26854e-112	elevated rate
16260	C	14754	13	0.000881117	4.29143e-05	elevated rate
16298	G	17205	9	0.000523104	0.0361163	elevated rate
16308	C	18951	11	0.000580444	0.00719677	elevated rate
16310	T	19059	15	0.00078703	2.61392e-05	elevated rate
16316	G	20163	10	0.000495958	0.0316562	elevated rate
16338	C	22555	33	0.00146309	2.80162e-19	elevated rate
16360	G	23739	37	0.00155862	1.45829e-22	elevated rate
16362	C	24178	11	0.000454959	0.0349393	elevated rate
16386	C	25137	16	0.000636512	0.000147423	elevated rate
16402	G	29163	127	0.00435483	1.51476e-131	elevated rate
16443	C	26411	13	0.000492219	0.00927882	elevated rate
16466	C	25790	55	0.00213261	1.71403e-40	elevated rate
16470	C	25278	22	0.000870322	1.40238e-08	elevated rate
16479	T	27929	19	0.000680296	7.98584e-06	elevated rate
16481	C	27860	13	0.000466619	0.0135808	elevated rate
16508	G	30859	13	0.000421271	0.0289731	elevated rate
16537	G	30326	13	0.000428675	0.0251509	elevated rate
16565	C	29612	33	0.00111441	6.52351e-16	elevated rate
16574	A	30964	13	0.000419842	0.0296653	elevated rate
16580	C	30750	14	0.000455285	0.0111326	elevated rate
16597	A	29361	17	0.000578999	0.00024134	elevated rate
16616	C	24933	14	0.000561505	0.00183788	elevated rate
16618	G	24472	22	0.000898987	7.86583e-09	elevated rate
16630	C	25456	20	0.000785669	4.32682e-07	elevated rate
16658	C	24064	20	0.000831117	1.80574e-07	elevated rate
16667	C	23575	30	0.00127253	6.27108e-16	elevated rate
16784	C	5602	11	0.00196358	1.59266e-07	elevated rate
16785	T	5785	6	0.00103717	0.00979303	elevated rate
16800	T	7883	6	0.000761132	0.0354301	elevated rate
16808	G	5601	5	0.000892698	0.0413749	elevated rate
16809	T	5716	8	0.00139958	0.000199935	elevated rate
16847	A	9529	53	0.00556197	6.32703e-60	elevated rate
16870	C	11223	47	0.00418783	1.61853e-47	elevated rate
16887	C	14611	10	0.000684416	0.00419352	elevated rate
16892	T	14989	15	0.00100073	1.46097e-06	elevated rate
16901	G	16727	16	0.000956537	9.53833e-07	elevated rate
16912	G	17492	11	0.000628859	0.00406133	elevated rate
16933	A	17938	61	0.0034006	1.48084e-56	elevated rate
16948	C	18200	11	0.000604396	0.00539123	elevated rate
17000	C	15733	194	0.0123308	2.76232e-287	elevated rate
17012	C	14234	8	0.000562035	0.0398748	elevated rate
17028	C	10839	7	0.000645816	0.0368908	elevated rate
17061	A	3409	15	0.00440012	3.1696e-15	elevated rate
17183	C	2976	7	0.00235215	3.17168e-05	elevated rate
17185	C	3099	4	0.00129074	0.0342432	elevated rate
17190	T	6263	17	0.00271435	5.85716e-14	elevated rate
17200	T	7658	16	0.00208932	1.88187e-11	elevated rate
17201	T	7664	6	0.000782881	0.0320715	elevated rate
17223	A	8243	11	0.00133447	6.2723e-06	elevated rate
17249	C	9661	23	0.00238071	9.17304e-18	elevated rate
17264	T	9808	17	0.00173328	6.15157e-11	elevated rate
17290	T	11543	54	0.00467816	3.79726e-57	elevated rate
17321	C	12148	18	0.00148173	1.65147e-10	elevated rate
17326	C	12096	8	0.000661376	0.0181292	elevated rate
17330	A	11274	7	0.000620898	0.042355	elevated rate
17338	G	11066	8	0.000722935	0.0112337	elevated rate
17339	C	10905	9	0.000825309	0.0024447	elevated rate
17352	C	11038	8	0.000724769	0.0110851	elevated rate
17359	G	11031	8	0.000725229	0.0110511	elevated rate
17421	C	11851	46	0.00388153	4.72965e-45	elevated rate
17435	G	11886	8	0.000673061	0.0167776	elevated rate
17440	C	14560	9	0.000618132	0.0144194	elevated rate
17456	C	14886	11	0.000738949	0.00114215	elevated rate
17465	C	15323	9	0.000587352	0.0193188	elevated rate
17470	C	15642	14	0.000895026	1.43542e-05	elevated rate
17474	C	15660	33	0.00210728	5.26386e-24	elevated rate
17488	G	15484	10	0.000645828	0.00616152	elevated rate
17492	C	15530	9	0.000579524	0.0209455	elevated rate
17557	T	15430	12	0.000777706	0.000338645	elevated rate
17573	C	14986	22	0.00146804	7.86717e-13	elevated rate
17591	T	12214	87	0.00712297	4.995e-108	elevated rate
17601	G	10864	10	0.000920471	0.000464128	elevated rate
17664	T	5967	7	0.00117312	0.00195041	elevated rate
17676	C	7643	9	0.00117755	0.000199935	elevated rate
17695	G	10633	7	0.000658328	0.0339507	elevated rate
17696	C	10678	19	0.00177936	1.86634e-12	elevated rate
17719	G	10025	11	0.00109726	3.81941e-05	elevated rate
17722	G	10677	201	0.0188255	0	elevated rate
17723	T	11326	38	0.00335511	7.59294e-35	elevated rate
17735	T	12820	13	0.00101404	9.81143e-06	elevated rate
17750	C	13205	9	0.00068156	0.00827985	elevated rate
17766	C	12796	35	0.00273523	3.87809e-29	elevated rate
17770	A	12724	24	0.0018862	2.4832e-16	elevated rate
17888	A	1841	8	0.00434546	6.25811e-08	elevated rate
17982	T	4939	14	0.00283458	1.08554e-11	elevated rate
17984	A	5014	16	0.00319107	3.64698e-14	elevated rate
17985	C	5088	56	0.0110063	1.14846e-79	elevated rate
17992	C	9852	30	0.00304507	3.017e-26	elevated rate
18005	T	12681	12	0.000946298	5.37608e-05	elevated rate
18110	C	22257	11	0.000494227	0.0210495	elevated rate
18115	C	22275	13	0.000583614	0.0022535	elevated rate
18138	C	22607	25	0.00110585	6.17338e-12	elevated rate
18143	C	23267	13	0.000558731	0.00330886	elevated rate
18189	C	40812	26	0.000637068	1.96352e-07	elevated rate
18196	A	46637	0	0	0.0424196	reduced rate
18203	T	52855	0	0	0.0175925	reduced rate
18205	T	53005	0	0	0.0175925	reduced rate
18210	G	52864	0	0	0.0175925	reduced rate
18211	A	53526	0	0	0.0177013	reduced rate
18213	G	53809	0	0	0.0178202	reduced rate
18233	A	54811	0	0	0.0186684	reduced rate
18243	T	57212	0	0	0.0135808	reduced rate
18253	A	59483	0	0	0.00984514	reduced rate
18254	T	59519	1	1.68014e-05	0.0492914	reduced rate
18256	T	60370	1	1.65645e-05	0.0499404	reduced rate
18259	A	60300	0	0	0.007025	reduced rate
18267	C	59883	25	0.000417481	0.00049029	elevated rate
18273	A	60574	1	1.65087e-05	0.0499895	reduced rate
18276	T	60760	0	0	0.00704394	reduced rate
18277	A	60661	0	0	0.00703447	reduced rate
18278	T	60655	0	0	0.00703447	reduced rate
18279	A	60481	0	0	0.007025	reduced rate
18282	A	59973	0	0	0.007025	reduced rate
18291	T	58096	0	0	0.00948827	reduced rate
18298	A	57016	37	0.000648941	7.41131e-11	elevated rate
18301	G	56343	0	0	0.0130914	reduced rate
18304	T	55844	0	0	0.0129166	reduced rate
18305	T	55744	0	0	0.0129088	reduced rate
18312	C	54230	20	0.0003688	0.0110398	elevated rate
18314	A	53773	29	0.000539304	8.5561e-07	elevated rate
18319	T	52836	0	0	0.0175925	reduced rate
18324	T	51274	0	0	0.0238569	reduced rate
18327	T	50416	0	0	0.0235787	reduced rate
18329	C	50083	18	0.000359403	0.0343182	elevated rate
18348	C	38861	22	0.00056612	1.79803e-05	elevated rate
18350	A	39965	24	0.000600525	2.06007e-06	elevated rate
18368	G	32967	23	0.000697667	2.98818e-07	elevated rate
18369	T	32318	34	0.00105205	1.11429e-15	elevated rate
18378	A	27861	28	0.00100499	2.01962e-12	elevated rate
18383	T	27972	161	0.00575576	6.15849e-186	elevated rate
18401	C	22904	14	0.000611247	0.000803726	elevated rate
18417	T	30911	650	0.0210281	0	elevated rate
18457	C	35893	18	0.000501491	0.000776616	elevated rate
18501	C	35433	19	0.000536223	0.000204351	elevated rate
18526	C	35436	18	0.000507958	0.000668771	elevated rate
18568	C	32275	19	0.000588691	5.86657e-05	elevated rate
18619	T	48154	0	0	0.0320781	reduced rate
18639	A	53527	0	0	0.0177013	reduced rate
18644	G	60349	46	0.000762233	5.18332e-16	elevated rate
18645	A	60451	0	0	0.007025	reduced rate
18655	A	75569	2	2.64659e-05	0.0385358	reduced rate
18657	C	75169	37	0.000492224	1.15994e-07	elevated rate
18672	T	84173	2	2.37606e-05	0.01789	reduced rate
18675	A	84943	2	2.35452e-05	0.0184156	reduced rate
18678	T	85956	2	2.32677e-05	0.0133003	reduced rate
18680	C	87769	39	0.000444348	6.02016e-07	elevated rate
18684	A	90018	3	3.33267e-05	0.0368969	reduced rate
18685	T	90896	65	0.000715103	2.78304e-21	elevated rate
18687	C	92607	30	0.00032395	0.00556387	elevated rate
18689	T	93949	3	3.19322e-05	0.0219847	reduced rate
18694	A	97576	0	0	4.38825e-05	reduced rate
18697	G	100793	3	2.9764e-05	0.0133499	reduced rate
18700	T	105599	3	2.84094e-05	0.00788115	reduced rate
18704	A	103624	3	2.89508e-05	0.0102844	reduced rate
18706	A	103377	2	1.93467e-05	0.00179091	reduced rate
18710	A	104653	0	0	1.51857e-05	reduced rate
18718	T	108583	1	9.20954e-06	0.000159259	reduced rate
18719	G	108272	2	1.8472e-05	0.00140157	reduced rate
18722	A	107913	4	3.70669e-05	0.0199001	reduced rate
18723	T	107894	4	3.70734e-05	0.0199001	reduced rate
18725	A	107972	2	1.85233e-05	0.0013797	reduced rate
18726	T	107947	4	3.70552e-05	0.0199013	reduced rate
18727	T	107762	1	9.27971e-06	0.000155334	reduced rate
18730	A	107538	33	0.000306868	0.0086866	elevated rate
18731	T	107741	0	0	1.07897e-05	reduced rate
18732	T	107978	3	2.77834e-05	0.00596682	reduced rate
18739	G	100651	29	0.000288124	0.0315959	elevated rate
18740	A	100593	2	1.98821e-05	0.00350723	reduced rate
18742	T	100281	41	0.000408851	2.22983e-06	elevated rate
18743	A	100046	4	3.99816e-05	0.0404741	reduced rate
18744	C	99620	37	0.000371411	9.19236e-05	elevated rate
18746	T	99786	3	3.00643e-05	0.0130419	reduced rate
18747	C	99621	35	0.000351332	0.000630351	elevated rate
18748	T	99928	1	1.00072e-05	0.000417541	reduced rate
18750	T	98802	1	1.01213e-05	0.000599953	reduced rate
18751	A	98774	2	2.02482e-05	0.00329449	reduced rate
18752	A	98213	0	0	4.46787e-05	reduced rate
18753	T	98473	4	4.06203e-05	0.0395665	reduced rate
18757	T	96940	2	2.06313e-05	0.00451688	reduced rate
18758	T	96936	3	3.09483e-05	0.0171332	reduced rate
18759	T	97007	1	1.03085e-05	0.000574703	reduced rate
18760	A	97063	3	3.09078e-05	0.017167	reduced rate
18761	T	97188	4	4.11573e-05	0.0499895	reduced rate
18763	A	96772	44	0.000454677	4.124e-08	elevated rate
18764	T	96541	1	1.03583e-05	0.00083647	reduced rate
18767	A	95539	3	3.14008e-05	0.0227317	reduced rate
18768	T	95677	35	0.000365814	0.000214938	elevated rate
18770	T	95516	1	1.04695e-05	0.000803726	reduced rate
18774	A	95157	0	0	6.13107e-05	reduced rate
18776	A	94972	2	2.10588e-05	0.00608451	reduced rate
18777	A	94662	3	3.16917e-05	0.0222871	reduced rate
18779	G	93001	2	2.15051e-05	0.00582699	reduced rate
18783	T	89299	2	2.23967e-05	0.0102057	reduced rate
18784	T	89132	3	3.36579e-05	0.0361163	reduced rate
18785	T	89077	3	3.36787e-05	0.0361029	reduced rate
18787	A	88077	1	1.13537e-05	0.00211076	reduced rate
18793	A	79693	0	0	0.000759175	reduced rate
18797	T	78882	1	1.26772e-05	0.00742583	reduced rate
18798	A	78571	1	1.27273e-05	0.00734144	reduced rate
18801	A	76250	1	1.31148e-05	0.00971217	reduced rate
18805	A	75937	2	2.63376e-05	0.0386973	reduced rate
18806	A	74944	2	2.66866e-05	0.0384631	reduced rate
18809	A	74974	2	2.66759e-05	0.0384631	reduced rate
18810	T	76062	1	1.31472e-05	0.00965817	reduced rate
18813	T	77449	2	2.58234e-05	0.0301325	reduced rate
18816	G	81193	27	0.000332541	0.00874813	elevated rate
18818	A	81277	45	0.000553662	5.99022e-11	elevated rate
18824	A	89972	1	1.11146e-05	0.00150777	reduced rate
18825	A	89310	2	2.23939e-05	0.0102057	reduced rate
18831	T	88970	3	3.37192e-05	0.0360523	reduced rate
18832	G	88259	1	1.13303e-05	0.00211838	reduced rate
18834	T	89774	3	3.34172e-05	0.0366922	reduced rate
18835	A	90111	1	1.10974e-05	0.00150914	reduced rate
18836	A	89466	1	1.11774e-05	0.00150377	reduced rate
18837	T	89290	2	2.23989e-05	0.0102057	reduced rate
18840	A	88054	0	0	0.000178356	reduced rate
18841	C	88118	26	0.000295059	0.0470234	elevated rate
18842	A	87712	1	1.14009e-05	0.00209217	reduced rate
18843	T	87830	3	3.41569e-05	0.0464238	reduced rate
18845	T	87338	0	0	0.000176272	reduced rate
18847	G	86837	3	3.45475e-05	0.0449626	reduced rate
18850	A	85304	2	2.34456e-05	0.0132293	reduced rate
18853	T	84251	0	0	0.000374881	reduced rate
18855	T	83786	1	1.19352e-05	0.00408745	reduced rate
18856	G	83579	2	2.39295e-05	0.0177161	reduced rate
18857	A	83379	2	2.39869e-05	0.0177013	reduced rate
18861	A	81239	0	0	0.000510646	reduced rate
18863	T	81322	0	0	0.000511385	reduced rate
18865	A	80897	1	1.23614e-05	0.00539203	reduced rate
18866	T	81264	0	0	0.000510646	reduced rate
18867	G	81362	2	2.45815e-05	0.0234553	reduced rate
18868	A	80591	1	1.24083e-05	0.00536219	reduced rate
18870	T	81181	2	2.46363e-05	0.0233608	reduced rate
18878	T	78790	1	1.2692e-05	0.0074071	reduced rate
18882	T	76038	1	1.31513e-05	0.00965817	reduced rate
18887	A	73463	1	1.36123e-05	0.012948	reduced rate
18892	T	71511	1	1.39839e-05	0.0177533	reduced rate
18896	T	70167	0	0	0.00191057	reduced rate
18899	T	68867	1	1.45207e-05	0.0235699	reduced rate
18901	A	68231	0	0	0.00268279	reduced rate
18905	G	67089	0	0	0.00398274	reduced rate
18908	T	66465	0	0	0.00385264	reduced rate
18911	A	65844	0	0	0.00375585	reduced rate
18913	T	65569	1	1.52511e-05	0.0302012	reduced rate
18915	G	65208	0	0	0.00371563	reduced rate
18916	A	64987	0	0	0.00371563	reduced rate
18918	T	64558	0	0	0.00539203	reduced rate
18920	T	63917	0	0	0.00527036	reduced rate
18924	A	62421	1	1.60202e-05	0.0385358	reduced rate
18926	A	61828	1	1.61739e-05	0.0384631	reduced rate
18929	C	60853	240	0.00394393	2.33295e-239	elevated rate
19003	T	8340	11	0.00131894	6.99035e-06	elevated rate
19004	T	9110	7	0.000768386	0.0170583	elevated rate
19007	C	9665	26	0.00269012	2.18096e-21	elevated rate
19049	C	19258	10	0.000519265	0.0238569	elevated rate
19065	T	19819	16	0.000807306	8.30666e-06	elevated rate
19211	G	11098	8	0.000720851	0.0114232	elevated rate
19220	C	10446	13	0.0012445	1.07978e-06	elevated rate
19227	C	9678	9	0.000929944	0.00108279	elevated rate
19239	A	12058	8	0.00066346	0.0178548	elevated rate
19264	C	15338	13	0.000847568	6.27914e-05	elevated rate
19290	C	14753	9	0.000610045	0.0157584	elevated rate
19294	T	14699	8	0.000544255	0.0457871	elevated rate
19334	A	15145	13	0.000858369	5.55984e-05	elevated rate
19360	C	13588	11	0.000809538	0.000540038	elevated rate
19367	C	14126	10	0.000707914	0.00330321	elevated rate
19439	C	9649	9	0.000932739	0.00105973	elevated rate
19441	C	9740	7	0.000718686	0.0230818	elevated rate
19466	G	8538	9	0.00105411	0.000450941	elevated rate
19514	G	5389	30	0.0055669	9.67143e-34	elevated rate
19529	C	4646	19	0.00408954	8.77583e-19	elevated rate
19547	C	2856	9	0.00315126	8.63135e-08	elevated rate
19594	C	817	3	0.00367197	0.00963058	elevated rate
19626	A	1798	10	0.00556174	5.19416e-11	elevated rate
19646	T	5251	11	0.00209484	8.49708e-08	elevated rate
19648	G	5536	5	0.000903179	0.0397493	elevated rate
19777	G	3701	8	0.00216158	9.8032e-06	elevated rate
19781	C	3885	5	0.001287	0.0115098	elevated rate
19796	C	6267	22	0.00351045	1.95274e-20	elevated rate
19806	C	5507	8	0.0014527	0.000155334	elevated rate
19819	C	9430	8	0.000848356	0.00477115	elevated rate
19859	C	11310	15	0.00132626	4.41647e-08	elevated rate
19862	C	11343	13	0.00114608	2.61949e-06	elevated rate
19878	G	12007	10	0.000832848	0.000990823	elevated rate
19928	C	11767	10	0.000849834	0.000848647	elevated rate
19943	C	14338	9	0.000627703	0.013164	elevated rate
19983	C	23678	250	0.0105583	0	elevated rate
19989	T	23599	11	0.000466121	0.0304379	elevated rate
20126	G	21913	13	0.000593255	0.00194851	elevated rate
20133	C	23275	15	0.000644468	0.00024684	elevated rate
20148	C	19749	10	0.000506355	0.0279338	elevated rate
20178	C	18021	10	0.000554908	0.0162648	elevated rate
20213	G	14578	8	0.000548772	0.0438607	elevated rate
20259	C	2602	11	0.00422752	6.60177e-11	elevated rate
20260	T	2748	13	0.00473071	1.49979e-13	elevated rate
20262	A	2677	9	0.00336197	5.07291e-08	elevated rate
20270	C	3683	9	0.00244366	6.72179e-07	elevated rate
20320	C	3994	5	0.00125188	0.0128736	elevated rate
20462	C	1231	16	0.0129976	1.5461e-23	elevated rate
20463	A	2787	5	0.00179404	0.00326538	elevated rate
20482	T	6940	8	0.00115274	0.000714747	elevated rate
20555	C	7294	28	0.00383877	3.87932e-27	elevated rate
20557	G	7341	9	0.00122599	0.000148471	elevated rate
20558	T	7307	163	0.0223074	3.77069e-283	elevated rate
20611	C	7175	7	0.00097561	0.00527571	elevated rate
20619	T	7374	12	0.00162734	2.27842e-07	elevated rate
20648	C	8056	6	0.000744786	0.0384631	elevated rate
20701	T	4447	5	0.00112435	0.0189276	elevated rate
20703	C	3613	8	0.00221423	8.29485e-06	elevated rate
20837	C	1343	3	0.0022338	0.0309085	elevated rate
20870	G	1517	7	0.00461437	4.32682e-07	elevated rate
20897	C	1657	3	0.0018105	0.0472798	elevated rate
20900	G	2160	4	0.00185185	0.0117061	elevated rate
20956	C	3328	4	0.00120192	0.0412214	elevated rate
20999	A	2595	11	0.00423892	6.43896e-11	elevated rate
21015	T	1916	5	0.0026096	0.000668771	elevated rate
21022	A	1763	15	0.00850822	2.49286e-19	elevated rate
21036	C	2223	4	0.00179937	0.0128821	elevated rate
21101	G	1857	9	0.00484653	2.28074e-09	elevated rate
21198	T	393	20	0.0508906	2.54329e-41	elevated rate
21207	C	2526	4	0.00158353	0.0189166	elevated rate
21228	G	2829	9	0.00318134	8.00067e-08	elevated rate
21466	A	2270	4	0.00176211	0.0135808	elevated rate
21511	A	9281	12	0.00129296	2.42753e-06	elevated rate
21531	T	21690	16	0.000737667	2.5465e-05	elevated rate
21532	A	22107	21	0.000949925	7.86163e-09	elevated rate
21549	C	35277	20	0.000566942	5.52265e-05	elevated rate
21561	C	38388	15	0.000390747	0.0267662	elevated rate
21575	C	40079	56	0.00139724	6.17104e-32	elevated rate
21587	C	42308	19	0.000449088	0.00183356	elevated rate
21606	G	45602	0	0	0.0413749	reduced rate
21611	A	48281	0	0	0.0321447	reduced rate
21612	A	51064	0	0	0.0237831	reduced rate
21617	A	50940	0	0	0.0237404	reduced rate
21622	C	51222	53	0.00103471	3.0907e-24	elevated rate
21624	G	51666	25	0.000483877	4.71066e-05	elevated rate
21625	A	51799	0	0	0.0242782	reduced rate
21626	A	51654	0	0	0.0241867	reduced rate
21646	C	55105	38	0.000689593	6.43441e-12	elevated rate
21652	T	53908	0	0	0.0178656	reduced rate
21654	C	54238	21	0.000387182	0.00512223	elevated rate
21655	T	54424	19	0.000349111	0.0301462	elevated rate
21674	T	49167	0	0	0.0327515	reduced rate
21691	C	41030	15	0.000365586	0.0424706	elevated rate
21697	C	41618	28	0.000672786	1.66336e-08	elevated rate
21703	T	44368	73	0.00164533	2.27855e-46	elevated rate
21707	C	44740	22	0.00049173	0.000149872	elevated rate
21725	T	46049	41	0.000890356	1.7734e-16	elevated rate
21736	C	49649	36	0.00072509	6.83342e-12	elevated rate
21743	A	49989	0	0	0.034203	reduced rate
21751	T	49172	0	0	0.0327515	reduced rate
21759	A	48584	72	0.00148197	8.64308e-43	elevated rate
21761	G	47948	28	0.000583966	3.04918e-07	elevated rate
21762	C	47752	253	0.00529821	1.1305e-283	elevated rate
21766	A	45315	0	0	0.0413749	reduced rate
21767	C	45306	0	0	0.0413749	reduced rate
21769	T	48101	0	0	0.0320715	reduced rate
21773	T	49529	0	0	0.0332263	reduced rate
21776	G	49693	81	0.00163001	3.38865e-51	elevated rate
21779	A	49467	0	0	0.0331775	reduced rate
21782	A	49500	0	0	0.0332196	reduced rate
21784	T	49468	2232	0.0451201	0	elevated rate
21788	A	49011	0	0	0.0327515	reduced rate
21792	A	48615	0	0	0.0323932	reduced rate
21798	T	47963	0	0	0.0320715	reduced rate
21803	A	45968	0	0	0.0416272	reduced rate
21808	T	45485	0	0	0.0413749	reduced rate
21811	C	45227	23	0.000508546	5.52265e-05	elevated rate
21846	C	39849	30	0.000752842	2.9196e-10	elevated rate
21928	C	967	3	0.00310238	0.0143428	elevated rate
21942	T	1217	5	0.00410846	8.84267e-05	elevated rate
21993	A	2546	8	0.00314218	6.66717e-07	elevated rate
22020	T	2757	15	0.0054407	1.52613e-16	elevated rate
22083	C	2535	5	0.00197239	0.00219328	elevated rate
22205	G	1007	10	0.00993049	1.96229e-13	elevated rate
22275	T	1173	13	0.0110827	3.76415e-18	elevated rate
22312	T	11162	8	0.000716717	0.0117842	elevated rate
22317	G	14914	21	0.00140807	6.80484e-12	elevated rate
22332	G	19211	11	0.000572589	0.00789815	elevated rate
22377	C	23421	17	0.000725844	1.43542e-05	elevated rate
22388	C	23308	11	0.000471941	0.0281502	elevated rate
22458	C	20252	15	0.000740668	5.21734e-05	elevated rate
22510	T	10678	17	0.00159206	2.21642e-10	elevated rate
22545	G	5530	6	0.00108499	0.00826134	elevated rate
22551	C	5627	10	0.00177715	1.87875e-06	elevated rate
22583	G	4880	6	0.00122951	0.00474531	elevated rate
22599	G	4794	7	0.00146016	0.000563385	elevated rate
22610	G	4868	6	0.00123254	0.00469547	elevated rate
22636	C	3695	11	0.002977	2.43227e-09	elevated rate
22639	C	5309	7	0.00131852	0.00100705	elevated rate
22742	A	5654	5	0.00088433	0.041961	elevated rate
22764	T	3084	13	0.0042153	6.08484e-13	elevated rate
22964	A	6144	7	0.00113932	0.00229758	elevated rate
22968	C	6368	9	0.00141332	5.0553e-05	elevated rate
22973	G	7321	8	0.00109275	0.0010003	elevated rate
22987	C	10046	12	0.00119451	5.41179e-06	elevated rate
23026	T	13989	11	0.000786332	0.000689868	elevated rate
23034	C	15846	15	0.000946611	2.85664e-06	elevated rate
23045	T	17104	9	0.000526193	0.0349986	elevated rate
23099	C	16257	9	0.000553608	0.0267946	elevated rate
23165	A	14281	43	0.00301099	1.3906e-37	elevated rate
23170	C	13951	9	0.000645115	0.0111985	elevated rate
23191	C	16215	9	0.000555042	0.0263708	elevated rate
23216	C	15276	9	0.000589159	0.0189644	elevated rate
23230	C	16525	10	0.000605144	0.00947083	elevated rate
23260	C	15914	10	0.000628378	0.00739678	elevated rate
23263	A	15923	30	0.00188407	1.84246e-20	elevated rate
23308	T	25694	13	0.000505955	0.00742583	elevated rate
23340	G	28630	16	0.000558854	0.000636965	elevated rate
23361	C	27837	12	0.000431081	0.0343182	elevated rate
23367	C	29820	13	0.000435949	0.0226891	elevated rate
23417	G	25516	13	0.000509484	0.00705423	elevated rate
23426	G	23749	13	0.000547391	0.0039541	elevated rate
23430	C	23507	11	0.000467946	0.0298033	elevated rate
23469	A	15661	11	0.000702382	0.00171971	elevated rate
23472	C	16508	10	0.000605767	0.00941714	elevated rate
23492	C	17537	11	0.000627245	0.00413534	elevated rate
23502	C	18902	12	0.000634853	0.00199802	elevated rate
23525	C	18932	160	0.0084513	5.72847e-211	elevated rate
23540	T	18489	13	0.000703121	0.000407004	elevated rate
23582	T	14433	169	0.0117093	1.83905e-246	elevated rate
23606	C	12740	15	0.00117739	1.96596e-07	elevated rate
23613	C	11500	17	0.00147826	6.76909e-10	elevated rate
23776	T	2247	4	0.00178015	0.0132118	elevated rate
24048	C	2262	5	0.00221043	0.00136078	elevated rate
24112	T	2702	18	0.00666173	1.97673e-21	elevated rate
24117	C	3682	11	0.00298751	2.35177e-09	elevated rate
24119	C	4352	158	0.0363051	4.5461e-308	elevated rate
24130	C	12376	8	0.000646412	0.020424	elevated rate
24213	C	20928	10	0.000477829	0.0384631	elevated rate
24223	C	20972	12	0.000572191	0.00470653	elevated rate
24237	C	21057	10	0.000474901	0.0394118	elevated rate
24252	C	19889	10	0.00050279	0.0292591	elevated rate
24285	G	21581	27	0.0012511	3.80363e-14	elevated rate
24291	G	24217	41	0.00169303	2.36722e-26	elevated rate
24320	C	23993	18	0.000750219	4.23765e-06	elevated rate
24333	C	23712	11	0.0004639	0.0314847	elevated rate
24334	C	23710	11	0.000463939	0.0314847	elevated rate
24358	C	22010	22	0.000999546	1.15325e-09	elevated rate
24374	C	19855	21	0.00105767	1.19334e-09	elevated rate
24378	C	19522	17	0.000870812	1.28826e-06	elevated rate
24536	C	6183	6	0.000970403	0.0131178	elevated rate
24588	C	6871	9	0.00130985	8.95887e-05	elevated rate
24684	A	3201	7	0.00218682	4.97086e-05	elevated rate
24693	G	1124	10	0.0088968	5.65237e-13	elevated rate
24720	C	1384	65	0.0469653	1.2309e-133	elevated rate
24829	T	2888	6	0.00207756	0.000351761	elevated rate
24883	G	1632	3	0.00183824	0.0455307	elevated rate
24940	T	544	3	0.00551471	0.00361093	elevated rate
24961	C	3027	6	0.00198216	0.000450941	elevated rate
24964	C	3077	6	0.00194995	0.000490901	elevated rate
24967	C	3621	70	0.0193317	7.72583e-117	elevated rate
24992	G	13088	8	0.000611247	0.0270107	elevated rate
25046	C	16299	11	0.000674888	0.00233951	elevated rate
25047	C	16485	23	0.00139521	5.67968e-13	elevated rate
25100	C	14654	10	0.000682408	0.00428381	elevated rate
25184	C	11286	8	0.000708843	0.012584	elevated rate
25186	G	11077	11	0.000993049	9.19236e-05	elevated rate
25227	C	8129	6	0.000738098	0.0393537	elevated rate
25258	T	3188	4	0.00125471	0.0369112	elevated rate
25384	A	1804	12	0.00665188	3.58433e-14	elevated rate
25403	T	2123	23	0.0108337	3.17469e-32	elevated rate
25440	G	6608	21	0.00317797	1.24548e-18	elevated rate
25441	C	6665	28	0.00420105	3.49945e-28	elevated rate
25460	C	7973	6	0.00075254	0.0369112	elevated rate
25498	C	12807	10	0.000780823	0.0016072	elevated rate
25513	C	15787	24	0.00152024	2.54715e-14	elevated rate
25549	C	16583	9	0.000542724	0.0301325	elevated rate
25572	C	15017	58	0.00386229	8.6554e-57	elevated rate
25577	T	17083	9	0.00052684	0.0347672	elevated rate
25578	C	27452	24	0.000874253	2.0477e-09	elevated rate
25587	C	29265	22	0.000751751	1.78864e-07	elevated rate
25604	T	30614	54	0.0017639	1.12698e-35	elevated rate
25614	C	33635	23	0.000683812	4.24901e-07	elevated rate
25657	A	34868	16	0.000458873	0.00492332	elevated rate
25672	C	34164	14	0.000409788	0.0250969	elevated rate
25677	G	33462	15	0.00044827	0.00885042	elevated rate
25678	C	33290	17	0.000510664	0.00101661	elevated rate
25703	C	29321	27	0.000920842	4.12066e-11	elevated rate
25714	C	25444	33	0.00129697	8.89815e-18	elevated rate
25734	C	7669	11	0.00143435	3.133e-06	elevated rate
25757	G	1491	3	0.00201207	0.0384631	elevated rate
26210	T	1796	7	0.00389755	1.28542e-06	elevated rate
26257	G	2684	6	0.00223547	0.000241256	elevated rate
26265	A	2721	5	0.00183756	0.00296643	elevated rate
26267	A	2754	29	0.0105301	2.04385e-40	elevated rate
26307	T	14406	32	0.0022213	6.07075e-24	elevated rate
26309	C	15077	58	0.00384692	1.04611e-56	elevated rate
26324	T	17158	9	0.000524537	0.0356911	elevated rate
26333	C	17062	31	0.0018169	1.04102e-20	elevated rate
26340	C	17228	13	0.000754586	0.000204249	elevated rate
26389	G	18591	10	0.000537895	0.0194032	elevated rate
26399	T	19002	14	0.000736765	0.000119303	elevated rate
26408	C	20514	15	0.000731208	5.97613e-05	elevated rate
26416	G	20268	36	0.0017762	8.75401e-24	elevated rate
26461	C	19286	17	0.000881468	1.09429e-06	elevated rate
26466	G	18883	13	0.00068845	0.00049732	elevated rate
26467	G	18986	13	0.000684715	0.00052078	elevated rate
26493	G	17119	10	0.000584146	0.0116007	elevated rate
26527	C	12918	8	0.000619291	0.0250969	elevated rate
26528	A	12680	170	0.0134069	7.60304e-258	elevated rate
26530	A	11354	9	0.000792672	0.00322634	elevated rate
26533	C	10575	7	0.000661939	0.0331417	elevated rate
26542	C	6537	212	0.0324308	0	elevated rate
26544	A	4445	5	0.00112486	0.0189166	elevated rate
26550	G	3934	17	0.0043213	3.58112e-17	elevated rate
26557	A	4812	7	0.0014547	0.000575031	elevated rate
26573	T	7372	12	0.00162778	2.27808e-07	elevated rate
26605	T	8644	23	0.00266081	8.8925e-19	elevated rate
26607	C	8646	6	0.000693963	0.0492914	elevated rate
26614	G	10806	9	0.000832871	0.00230209	elevated rate
26620	G	11700	267	0.0228205	0	elevated rate
26654	G	22089	12	0.000543257	0.00701575	elevated rate
26660	G	25624	11	0.000429285	0.0482622	elevated rate
26681	C	26876	41	0.00152552	1.08194e-24	elevated rate
26710	C	24577	17	0.000691704	2.68143e-05	elevated rate
26719	T	26066	18	0.000690555	1.32021e-05	elevated rate
26728	C	26298	16	0.000608411	0.00024684	elevated rate
26753	C	27040	19	0.000702663	5.01138e-06	elevated rate
26754	G	26771	33	0.00123268	3.78064e-17	elevated rate
26775	G	30973	17	0.000548865	0.000453224	elevated rate
26782	T	31082	30	0.000965189	6.88568e-13	elevated rate
26784	G	31057	15	0.000482983	0.00463022	elevated rate
26852	G	20042	19	0.000948009	5.91209e-08	elevated rate
26882	C	20096	13	0.000646895	0.000883572	elevated rate
26894	C	19440	43	0.00221193	3.32479e-32	elevated rate
26895	C	19368	58	0.00299463	1.03602e-50	elevated rate
26900	C	18365	9	0.000490063	0.0492914	elevated rate
26906	T	18270	41	0.00224412	6.34808e-31	elevated rate
26924	A	11763	22	0.00187027	6.99461e-15	elevated rate
26947	C	13333	17	0.00127503	6.07585e-09	elevated rate
26952	A	13443	14	0.00104143	2.56713e-06	elevated rate
26987	T	8741	20	0.00228807	4.28783e-15	elevated rate
26988	C	8741	8	0.000915227	0.00304294	elevated rate
26989	T	8877	27	0.00304157	1.39401e-23	elevated rate
27038	A	6200	6	0.000967742	0.0132231	elevated rate
27039	T	6056	7	0.00115588	0.00211838	elevated rate
27040	C	5931	8	0.00134885	0.000254602	elevated rate
27047	G	5973	21	0.00351582	1.71119e-19	elevated rate
27055	A	5742	5	0.000870777	0.0440516	elevated rate
27084	G	2869	16	0.00557686	7.8892e-18	elevated rate
27122	G	2026	15	0.00740375	1.85638e-18	elevated rate
27131	C	2398	4	0.00166806	0.0163857	elevated rate
27155	C	1472	18	0.0122283	4.67307e-26	elevated rate
27194	G	3152	4	0.00126904	0.0359085	elevated rate
27266	T	2416	13	0.00538079	3.09692e-14	elevated rate
27305	T	387	2	0.00516796	0.0388802	elevated rate
27306	C	373	2	0.00536193	0.0369112	elevated rate
27307	A	293	3	0.0102389	0.00069436	elevated rate
27308	T	208	2	0.00961538	0.0148157	elevated rate
27347	A	83	2	0.0240964	0.00325168	elevated rate
27351	T	80	2	0.025	0.00304628	elevated rate
27448	C	686	8	0.0116618	3.30773e-11	elevated rate
27451	T	1336	66	0.0494012	3.54258e-137	elevated rate
27476	C	28640	32	0.00111732	1.88789e-15	elevated rate
27494	C	32712	13	0.000397408	0.0413749	elevated rate
27501	T	33330	15	0.000450045	0.00858523	elevated rate
27509	C	33870	20	0.000590493	3.13245e-05	elevated rate
27538	C	35903	21	0.000584909	1.97128e-05	elevated rate
27541	G	37739	21	0.000556454	4.11846e-05	elevated rate
27553	T	39025	35	0.000896861	3.8905e-14	elevated rate
27561	G	38974	24	0.000615795	1.32612e-06	elevated rate
27578	A	38803	18	0.000463882	0.00191007	elevated rate
27641	C	31937	21	0.000657545	3.21507e-06	elevated rate
27697	C	9611	8	0.00083238	0.00527571	elevated rate
27698	T	9625	13	0.00135065	4.36705e-07	elevated rate
27706	G	10288	8	0.000777605	0.00768857	elevated rate
27758	G	5674	6	0.00105746	0.0092471	elevated rate
27761	T	5684	5	0.000879662	0.0426706	elevated rate
27791	C	4604	6	0.00130321	0.00361106	elevated rate
27833	T	2950	6	0.0020339	0.000393617	elevated rate
27874	C	7630	8	0.00104849	0.00130727	elevated rate
27877	G	7746	6	0.000774593	0.0331321	elevated rate
27879	C	7706	7	0.000908383	0.00750921	elevated rate
27889	C	8114	21	0.00258812	6.72152e-17	elevated rate
27919	T	9031	16	0.00177168	2.03922e-10	elevated rate
27999	C	8331	7	0.000840235	0.0108597	elevated rate
28005	C	8055	6	0.000744879	0.0384631	elevated rate
28022	T	5481	7	0.00127714	0.00121735	elevated rate
28037	A	10034	7	0.000697628	0.0261862	elevated rate
28039	T	10258	7	0.000682394	0.0292591	elevated rate
28089	G	26047	23	0.000883019	4.29594e-09	elevated rate
28147	C	28426	38	0.0013368	6.13222e-21	elevated rate
28153	C	28647	13	0.0004538	0.0171035	elevated rate
28182	A	26091	17	0.000651566	5.63366e-05	elevated rate
28236	C	20823	15	0.000720357	7.06287e-05	elevated rate
28237	G	20545	48	0.00233633	4.7288e-37	elevated rate
28239	G	19845	26	0.00131015	4.55844e-14	elevated rate
28242	G	14275	15	0.00105079	8.09179e-07	elevated rate
28245	T	14074	10	0.00071053	0.00322634	elevated rate
28253	C	23724	63	0.00265554	5.01998e-52	elevated rate
28256	C	18811	12	0.000637925	0.00192359	elevated rate
28269	C	42312	64	0.00151257	1.66676e-38	elevated rate
28286	G	47385	0	0	0.0438637	reduced rate
28297	T	50392	44	0.000873154	2.16146e-17	elevated rate
28311	C	50915	26	0.000510655	1.1484e-05	elevated rate
28312	C	51292	41	0.000799345	6.26255e-15	elevated rate
28318	T	51703	0	0	0.0241867	reduced rate
28319	A	51858	0	0	0.0243423	reduced rate
28323	T	52158	0	0	0.0247518	reduced rate
28333	C	53618	18	0.000335708	0.0462953	elevated rate
28335	C	53819	20	0.000371616	0.0101771	elevated rate
28339	T	54411	35	0.000643252	3.67363e-10	elevated rate
28341	C	56671	20	0.000352914	0.0219569	elevated rate
28345	T	58147	0	0	0.00948827	reduced rate
28351	T	58409	0	0	0.00953106	reduced rate
28353	A	59037	0	0	0.00965817	reduced rate
28358	A	59067	0	0	0.00966289	reduced rate
28368	G	58866	19	0.000322767	0.0491936	elevated rate
28380	G	66882	1	1.49517e-05	0.0224214	reduced rate
28383	C	66683	38	0.00056986	1.44021e-09	elevated rate
28389	A	66849	0	0	0.00393204	reduced rate
28406	T	49729	83	0.00166905	3.0304e-53	elevated rate
28407	T	49586	43	0.00086718	6.84645e-17	elevated rate
28408	A	49452	0	0	0.033174	reduced rate
28447	A	57033	0	0	0.0134481	reduced rate
28464	T	59927	0	0	0.0101206	reduced rate
28468	A	59529	1	1.67985e-05	0.0492914	reduced rate
28470	T	59072	1	1.69285e-05	0.0492914	reduced rate
28475	C	57741	20	0.000346374	0.024124	elevated rate
28479	G	58942	1	1.69658e-05	0.0492914	reduced rate
28488	T	60557	1	1.65134e-05	0.0499895	reduced rate
28493	A	60079	1	1.66448e-05	0.0497529	reduced rate
28494	T	60106	0	0	0.007025	reduced rate
28496	A	60155	0	0	0.007025	reduced rate
28497	A	59899	0	0	0.0101154	reduced rate
28503	A	59022	0	0	0.00965817	reduced rate
28507	C	60614	30	0.000494935	2.85664e-06	elevated rate
28512	C	57841	23	0.000397642	0.00192776	elevated rate
28516	T	57166	22	0.000384844	0.00403281	elevated rate
28521	A	58166	0	0	0.00948827	reduced rate
28529	T	57506	0	0	0.00948827	reduced rate
28531	C	56913	38	0.000667686	1.64617e-11	elevated rate
28533	A	56527	0	0	0.013164	reduced rate
28544	A	53539	0	0	0.0177013	reduced rate
28546	C	53225	18	0.000338187	0.0440516	elevated rate
28555	T	53972	0	0	0.01789	reduced rate
28566	A	54762	0	0	0.0186364	reduced rate
28571	A	51252	0	0	0.0238569	reduced rate
28597	G	42778	35	0.000818178	5.22417e-13	elevated rate
28602	T	48046	0	0	0.0320715	reduced rate
28603	C	47745	28	0.000586449	2.81143e-07	elevated rate
28616	A	50548	0	0	0.0235787	reduced rate
28626	A	46852	0	0	0.0427059	reduced rate
28633	A	47277	0	0	0.0436154	reduced rate
28645	T	46058	0	0	0.0417171	reduced rate
28649	A	46831	0	0	0.0426852	reduced rate
28650	A	46733	0	0	0.0425435	reduced rate
28651	C	46403	50	0.00107752	1.34333e-23	elevated rate
28662	T	45968	0	0	0.0416272	reduced rate
28668	G	48728	212	0.00435068	4.30896e-220	elevated rate
28669	G	49332	89	0.0018041	7.66085e-60	elevated rate
28681	G	54480	21	0.000385463	0.00529989	elevated rate
28683	G	54647	0	0	0.0185179	reduced rate
28695	C	53265	59	0.00110767	1.71698e-28	elevated rate
28696	A	53254	0	0	0.0176196	reduced rate
28698	C	52946	26	0.000491066	2.31042e-05	elevated rate
28699	A	53169	0	0	0.0176014	reduced rate
28700	A	53104	0	0	0.0175945	reduced rate
28701	A	52926	0	0	0.0175925	reduced rate
28702	A	52752	0	0	0.0175925	reduced rate
28709	A	52855	0	0	0.0175925	reduced rate
28721	A	52403	0	0	0.0250969	reduced rate
28722	A	52322	0	0	0.0250098	reduced rate
28728	C	51451	30	0.000583079	9.65608e-08	elevated rate
28731	A	51429	0	0	0.0240008	reduced rate
28740	C	50670	18	0.00035524	0.0358377	elevated rate
28748	C	51297	30	0.00058483	9.11063e-08	elevated rate
28750	A	51180	0	0	0.0238314	reduced rate
28756	T	45814	0	0	0.0415085	reduced rate
28760	C	45369	20	0.00044083	0.00151797	elevated rate
28769	A	45074	0	0	0.0413749	reduced rate
28776	C	43184	18	0.000416821	0.00596116	elevated rate
28780	A	42817	23	0.00053717	2.355e-05	elevated rate
28791	C	40864	18	0.000440486	0.00337296	elevated rate
28801	C	35305	253	0.00716612	4.6630767e-316	elevated rate
28826	C	39798	18	0.000452284	0.00251438	elevated rate
28857	G	36782	39	0.0010603	4.11488e-18	elevated rate
28877	A	27086	41	0.0015137	1.43305e-24	elevated rate
28878	G	26922	52	0.00193151	3.30344e-36	elevated rate
28880	A	26035	14	0.000537738	0.00274194	elevated rate
28937	C	16554	102	0.00616165	1.75889e-120	elevated rate
28951	A	45211	0	0	0.0413749	reduced rate
28969	C	45874	18	0.000392379	0.0104987	elevated rate
28970	A	46204	0	0	0.0418449	reduced rate
28975	G	46415	20	0.000430895	0.00201113	elevated rate
28989	A	51087	0	0	0.0237831	reduced rate
28992	A	51317	20	0.000389734	0.00632912	elevated rate
29004	A	51718	0	0	0.0241867	reduced rate
29020	A	51519	0	0	0.0240842	reduced rate
29025	C	49834	215	0.00431432	1.97498e-222	elevated rate
29027	G	50212	0	0	0.0235787	reduced rate
29029	T	50713	0	0	0.0236374	reduced rate
29031	A	58036	25	0.000430767	0.000301584	elevated rate
29032	G	58471	0	0	0.00953979	reduced rate
29035	T	58505	0	0	0.0095402	reduced rate
29048	C	58973	1	1.69569e-05	0.0492914	reduced rate
29049	G	59119	1	1.6915e-05	0.0492914	reduced rate
29051	C	59257	69	0.00116442	1.17945e-34	elevated rate
29052	A	60212	1	1.6608e-05	0.0498146	reduced rate
29053	A	60107	0	0	0.007025	reduced rate
29054	A	60102	1	1.66384e-05	0.0497529	reduced rate
29060	A	59658	0	0	0.00994521	reduced rate
29066	A	59518	0	0	0.00985771	reduced rate
29067	C	59393	30	0.00050511	1.92505e-06	elevated rate
29069	A	59487	20	0.000336208	0.0301747	elevated rate
29071	A	59216	0	0	0.00971217	reduced rate
29077	C	59055	27	0.000457201	5.04106e-05	elevated rate
29095	C	48894	20	0.000409048	0.00373293	elevated rate
29101	A	48511	0	0	0.0323324	reduced rate
29104	T	47205	0	0	0.0434589	reduced rate
29106	G	47219	0	0	0.043469	reduced rate
29115	A	49006	0	0	0.0327515	reduced rate
29130	T	45139	0	0	0.0413749	reduced rate
29162	G	41028	17	0.000414351	0.00884053	elevated rate
29167	C	43171	24	0.000555929	7.73551e-06	elevated rate
29171	C	46066	135	0.00293058	1.07692e-117	elevated rate
29173	T	47003	0	0	0.0429424	reduced rate
29180	C	49618	33	0.000665081	6.26263e-10	elevated rate
29185	T	59386	0	0	0.00979303	reduced rate
29197	C	60528	31	0.00051216	8.72416e-07	elevated rate
29200	C	60464	46	0.000760783	5.5348e-16	elevated rate
29206	T	63455	0	0	0.00517526	reduced rate
29210	G	62339	0	0	0.00750921	reduced rate
29213	T	61776	1	1.61875e-05	0.0384631	reduced rate
29214	T	61587	0	0	0.00723898	reduced rate
29216	T	60350	0	0	0.007025	reduced rate
29219	G	60514	1	1.65251e-05	0.0499895	reduced rate
29220	G	61411	35	0.00056993	8.42748e-09	elevated rate
29222	A	61839	0	0	0.00734044	reduced rate
29232	T	73832	0	0	0.00140262	reduced rate
29237	A	74375	1	1.34454e-05	0.00948827	reduced rate
29246	A	75478	0	0	0.000974389	reduced rate
29247	C	75325	31	0.00041155	6.93946e-05	elevated rate
29248	A	75453	0	0	0.000974389	reduced rate
29252	T	75914	2	2.63456e-05	0.0386973	reduced rate
29253	C	74466	53	0.000711734	3.0791e-17	elevated rate
29258	A	75608	2	2.64522e-05	0.0385358	reduced rate
29264	T	77778	2	2.57142e-05	0.0301462	reduced rate
29267	A	79074	0	0	0.000728923	reduced rate
29271	A	79314	0	0	0.000738344	reduced rate
29272	C	79233	31	0.000391251	0.000180003	elevated rate
29273	A	79060	1	1.26486e-05	0.0074696	reduced rate
29274	C	79137	42	0.000530725	1.158e-09	elevated rate
29277	G	78703	2	2.5412e-05	0.0304379	reduced rate
29278	T	77910	1	1.28353e-05	0.00719315	reduced rate
29283	T	77550	0	0	0.000694173	reduced rate
29284	C	77426	25	0.000322889	0.0175924	elevated rate
29288	T	77248	2	2.58906e-05	0.0398272	reduced rate
29292	A	76406	2	2.6176e-05	0.0390753	reduced rate
29295	A	73650	1	1.35777e-05	0.0130419	reduced rate
29296	C	73742	69	0.000935695	4.29476e-29	elevated rate
29301	A	73939	1	1.35247e-05	0.013164	reduced rate
29305	A	74131	2	2.69793e-05	0.0498935	reduced rate
29311	C	69328	30	0.000432726	3.99799e-05	elevated rate
29314	A	69232	1	1.44442e-05	0.0169499	reduced rate
29316	A	67659	1	1.478e-05	0.0225627	reduced rate
29319	A	67416	1	1.48333e-05	0.0225024	reduced rate
29320	A	67481	1	1.4819e-05	0.0225024	reduced rate
29327	T	64590	1	1.54823e-05	0.0296653	reduced rate
29328	T	64566	1	1.5488e-05	0.0296653	reduced rate
29331	T	64422	0	0	0.00538931	reduced rate
29337	A	64429	1	1.5521e-05	0.0296653	reduced rate
29340	A	63587	1	1.57265e-05	0.0395066	reduced rate
29343	T	64504	0	0	0.00539203	reduced rate
29350	A	64027	0	0	0.00528052	reduced rate
29352	A	65579	1	1.52488e-05	0.0302012	reduced rate
29354	A	64921	0	0	0.00371563	reduced rate
29356	A	64737	0	0	0.00545807	reduced rate
29370	C	59389	21	0.000353601	0.0166897	elevated rate
29377	T	56955	28	0.000491616	8.61724e-06	elevated rate
29381	A	55922	20	0.000357641	0.0202865	elevated rate
29386	C	54216	38	0.0007009	3.99621e-12	elevated rate
29387	A	54938	0	0	0.0188271	reduced rate
29410	T	51003	0	0	0.0237666	reduced rate
29421	C	50074	18	0.000359468	0.0343182	elevated rate
29432	A	53451	29	0.000542553	7.58986e-07	elevated rate
29441	C	54179	22	0.000406061	0.00205182	elevated rate
29443	A	53635	0	0	0.0177283	reduced rate
29448	T	52167	0	0	0.0247518	reduced rate
29455	T	48579	0	0	0.0323793	reduced rate
29461	T	49648	0	0	0.0334644	reduced rate
29466	C	50170	23	0.000458441	0.000264847	elevated rate
29470	T	48834	0	0	0.0326212	reduced rate
29476	T	47581	0	0	0.0320339	reduced rate
29503	C	39139	17	0.000434349	0.00560172	elevated rate
29555	C	26443	13	0.000491623	0.00936298	elevated rate
29563	C	14080	17	0.00120739	1.34586e-08	elevated rate
29566	T	12124	34	0.00280435	1.20835e-28	elevated rate
29567	A	11086	33	0.00297673	1.33949e-28	elevated rate
29608	C	2664	11	0.00412913	8.42194e-11	elevated rate
29637	T	2822	6	0.00212615	0.000311008	elevated rate
29662	T	3568	5	0.00140135	0.00858368	elevated rate
29666	C	3582	5	0.00139587	0.0086866	elevated rate
29696	C	4789	5	0.00104406	0.0244081	elevated rate
29698	T	5017	5	0.000996612	0.0292591	elevated rate
29702	G	6038	34	0.005631	1.84829e-38	elevated rate
29708	C	8451	6	0.000709975	0.0447521	elevated rate
29762	C	8383	6	0.000715734	0.0433853	elevated rate
29767	A	8298	11	0.00132562	6.66637e-06	elevated rate
29788	C	7394	6	0.000811469	0.0276727	elevated rate
29802	C	5294	8	0.00151114	0.000118348	elevated rate
29803	C	5204	6	0.00115296	0.00628401	elevated rate
29875	A	146	2	0.0136986	0.00846732	elevated rate
29877	A	100	2	0.02	0.00451688	elevated rate
29878	A	81	2	0.0246914	0.00311863	elevated rate
29881	A	62	2	0.0322581	0.00192527	elevated rate

## Sheet: Sup. Table 4
POS	REF	type						Supplementary Table 4
123	C	elevated rate
129	A	reduced rate
136	A	reduced rate
138	A	reduced rate
145	T	reduced rate
163	A	reduced rate
170	A	reduced rate
172	T	reduced rate
179	T	reduced rate
186	C	elevated rate
194	T	reduced rate
198	G	reduced rate
203	C	elevated rate
211	T	reduced rate
215	A	reduced rate
222	C	elevated rate
226	A	reduced rate
231	A	reduced rate
253	A	reduced rate
300	C	elevated rate
311	C	elevated rate
316	T	reduced rate
328	A	reduced rate
335	C	elevated rate
344	C	elevated rate
353	G	reduced rate
393	G	reduced rate
395	C	elevated rate
399	A	reduced rate
402	T	reduced rate
404	A	reduced rate
417	G	elevated rate
423	T	reduced rate
443	G	elevated rate
445	T	reduced rate
446	T	reduced rate
447	T	reduced rate
453	A	reduced rate
454	A	reduced rate
456	T	reduced rate
457	T	reduced rate
459	A	reduced rate
460	A	reduced rate
467	T	reduced rate
474	T	reduced rate
477	T	reduced rate
481	A	reduced rate
493	T	reduced rate
496	A	reduced rate
499	T	reduced rate
502	A	reduced rate
504	C	elevated rate
506	C	elevated rate
507	A	elevated rate
509	G	elevated rate
512	C	elevated rate
513	A	elevated rate
514	T	elevated rate
515	G	elevated rate
517	T	elevated rate
518	A	elevated rate
520	G	elevated rate
531	T	reduced rate
538	A	reduced rate
554	T	reduced rate
683	C	elevated rate
685	A	elevated rate
857	C	elevated rate
1077	C	elevated rate
1190	C	elevated rate
1191	C	elevated rate
1254	C	elevated rate
1288	C	elevated rate
1349	C	elevated rate
1367	A	elevated rate
1469	C	elevated rate
1628	C	elevated rate
1800	C	elevated rate
1806	G	elevated rate
1813	T	elevated rate
1828	G	elevated rate
1853	C	elevated rate
1912	C	elevated rate
2147	C	elevated rate
2173	G	elevated rate
2174	G	elevated rate
2178	G	elevated rate
2331	G	elevated rate
2334	C	elevated rate
3893	G	elevated rate
4456	C	elevated rate
4626	C	elevated rate
4640	T	elevated rate
4643	G	elevated rate
4668	C	elevated rate
5457	C	elevated rate
5934	C	elevated rate
6027	C	elevated rate
6457	T	elevated rate
7213	G	elevated rate
7571	G	elevated rate
7573	C	elevated rate
7660	T	elevated rate
8160	C	elevated rate
8163	T	elevated rate
8197	A	elevated rate
8247	C	elevated rate
8290	C	elevated rate
8376	C	elevated rate
8566	T	elevated rate
8859	T	elevated rate
8907	T	elevated rate
8927	G	elevated rate
9044	G	elevated rate
9045	G	elevated rate
9081	T	elevated rate
9470	A	elevated rate
9573	G	elevated rate
9627	C	elevated rate
9837	T	elevated rate
9943	C	elevated rate
9953	G	elevated rate
9954	C	elevated rate
9969	C	elevated rate
9996	C	elevated rate
10086	G	elevated rate
10244	C	elevated rate
10557	C	elevated rate
10594	C	elevated rate
10660	T	elevated rate
10702	C	elevated rate
10726	C	elevated rate
11074	C	elevated rate
11083	G	elevated rate
11322	C	elevated rate
11521	G	elevated rate
11535	G	elevated rate
11628	A	elevated rate
11645	T	elevated rate
11653	C	elevated rate
11665	C	elevated rate
11704	C	elevated rate
11990	G	elevated rate
12006	T	elevated rate
12013	T	elevated rate
12505	T	elevated rate
12768	C	elevated rate
12769	G	elevated rate
12789	C	elevated rate
12907	G	elevated rate
12924	C	elevated rate
13115	C	elevated rate
13306	T	elevated rate
13316	C	elevated rate
13445	G	elevated rate
13459	G	elevated rate
13481	T	elevated rate
13926	G	elevated rate
14081	G	elevated rate
14251	T	elevated rate
14555	T	elevated rate
14599	C	elevated rate
14850	A	elevated rate
14867	T	elevated rate
15017	C	elevated rate
15157	C	elevated rate
15227	G	elevated rate
15240	C	elevated rate
15259	A	elevated rate
15267	A	reduced rate
15271	A	reduced rate
15289	T	reduced rate
15296	A	reduced rate
15302	A	reduced rate
15316	A	reduced rate
15317	T	reduced rate
15324	C	elevated rate
15326	T	reduced rate
15363	A	reduced rate
15830	C	elevated rate
16133	A	elevated rate
16149	T	elevated rate
16154	T	elevated rate
16247	C	elevated rate
16260	C	elevated rate
16310	T	elevated rate
16338	C	elevated rate
16466	C	elevated rate
16597	A	elevated rate
16618	G	elevated rate
16630	C	elevated rate
16784	C	elevated rate
16785	T	elevated rate
16800	T	elevated rate
16870	C	elevated rate
16887	C	elevated rate
17190	T	elevated rate
17200	T	elevated rate
17474	C	elevated rate
17676	C	elevated rate
17719	G	elevated rate
17722	G	elevated rate
17723	T	elevated rate
18138	C	elevated rate
18350	A	elevated rate
18368	G	elevated rate
18383	T	elevated rate
18401	C	elevated rate
18526	C	elevated rate
18644	G	elevated rate
18657	C	elevated rate
18678	T	reduced rate
18680	C	elevated rate
18687	C	elevated rate
18694	A	reduced rate
18700	T	reduced rate
18706	A	reduced rate
18710	A	reduced rate
18718	T	reduced rate
18719	G	reduced rate
18722	A	reduced rate
18725	A	reduced rate
18726	T	reduced rate
18727	T	reduced rate
18730	A	elevated rate
18731	T	reduced rate
18744	C	elevated rate
18747	C	elevated rate
18751	A	reduced rate
18752	A	reduced rate
18753	T	reduced rate
18759	T	reduced rate
18761	T	reduced rate
18764	T	reduced rate
18767	A	reduced rate
18776	A	reduced rate
18785	T	reduced rate
18801	A	reduced rate
18806	A	reduced rate
18810	T	reduced rate
18824	A	reduced rate
18825	A	reduced rate
18831	T	reduced rate
18832	G	reduced rate
18835	A	reduced rate
18836	A	reduced rate
18837	T	reduced rate
18840	A	reduced rate
18842	A	reduced rate
18847	G	reduced rate
18850	A	reduced rate
18855	T	reduced rate
18857	A	reduced rate
18866	T	reduced rate
18867	G	reduced rate
18870	T	reduced rate
18878	T	reduced rate
18887	A	reduced rate
18892	T	reduced rate
18899	T	reduced rate
18911	A	reduced rate
18913	T	reduced rate
18929	C	elevated rate
19003	T	elevated rate
19007	C	elevated rate
19220	C	elevated rate
19626	A	elevated rate
19796	C	elevated rate
19983	C	elevated rate
19989	T	elevated rate
20178	C	elevated rate
20270	C	elevated rate
20462	C	elevated rate
20558	T	elevated rate
20619	T	elevated rate
20703	C	elevated rate
20956	C	elevated rate
21022	A	elevated rate
21101	G	elevated rate
21198	T	elevated rate
21532	A	elevated rate
21549	C	elevated rate
21575	C	elevated rate
21622	C	elevated rate
21646	C	elevated rate
21654	C	elevated rate
21691	C	elevated rate
21707	C	elevated rate
21784	T	elevated rate
21846	C	elevated rate
22275	T	elevated rate
22332	G	elevated rate
22987	C	elevated rate
23165	A	elevated rate
23170	C	elevated rate
23191	C	elevated rate
23216	C	elevated rate
23230	C	elevated rate
23308	T	elevated rate
23469	A	elevated rate
23492	C	elevated rate
23540	T	elevated rate
23582	T	elevated rate
24112	T	elevated rate
24119	C	elevated rate
24237	C	elevated rate
24285	G	elevated rate
24291	G	elevated rate
24320	C	elevated rate
24333	C	elevated rate
24693	G	elevated rate
24720	C	elevated rate
25047	C	elevated rate
25100	C	elevated rate
25184	C	elevated rate
25384	A	elevated rate
25403	T	elevated rate
25441	C	elevated rate
25460	C	elevated rate
25549	C	elevated rate
25572	C	elevated rate
25587	C	elevated rate
25604	T	elevated rate
25703	C	elevated rate
26267	A	elevated rate
26333	C	elevated rate
26340	C	elevated rate
26416	G	elevated rate
26466	G	elevated rate
26467	G	elevated rate
26493	G	elevated rate
26527	C	elevated rate
26528	A	elevated rate
26530	A	elevated rate
26544	A	elevated rate
26620	G	elevated rate
26681	C	elevated rate
26719	T	elevated rate
26753	C	elevated rate
26754	G	elevated rate
26852	G	elevated rate
26882	C	elevated rate
26895	C	elevated rate
26924	A	elevated rate
27038	A	elevated rate
27039	T	elevated rate
27040	C	elevated rate
27122	G	elevated rate
27131	C	elevated rate
27155	C	elevated rate
27448	C	elevated rate
27451	T	elevated rate
27476	C	elevated rate
27509	C	elevated rate
27641	C	elevated rate
27697	C	elevated rate
27758	G	elevated rate
27761	T	elevated rate
27791	C	elevated rate
27877	G	elevated rate
27879	C	elevated rate
27889	C	elevated rate
28022	T	elevated rate
28037	A	elevated rate
28147	C	elevated rate
28242	G	elevated rate
28253	C	elevated rate
28311	C	elevated rate
28312	C	elevated rate
28383	C	elevated rate
28406	T	elevated rate
28407	T	elevated rate
28507	C	elevated rate
28512	C	elevated rate
28531	C	elevated rate
28651	C	elevated rate
28668	G	elevated rate
28669	G	elevated rate
28695	C	elevated rate
28698	C	elevated rate
28721	A	reduced rate
28748	C	elevated rate
28776	C	elevated rate
28791	C	elevated rate
28801	C	elevated rate
28826	C	elevated rate
28951	A	reduced rate
28969	C	elevated rate
29004	A	reduced rate
29025	C	elevated rate
29029	T	reduced rate
29035	T	reduced rate
29049	G	reduced rate
29051	C	elevated rate
29054	A	reduced rate
29067	C	elevated rate
29069	A	elevated rate
29071	A	reduced rate
29077	C	elevated rate
29095	C	elevated rate
29101	A	reduced rate
29167	C	elevated rate
29171	C	elevated rate
29200	C	elevated rate
29220	G	elevated rate
29246	A	reduced rate
29247	C	elevated rate
29248	A	reduced rate
29253	C	elevated rate
29258	A	reduced rate
29267	A	reduced rate
29271	A	reduced rate
29274	C	elevated rate
29284	C	elevated rate
29295	A	reduced rate
29296	C	elevated rate
29305	A	reduced rate
29311	C	elevated rate
29319	A	reduced rate
29337	A	reduced rate
29343	T	reduced rate
29352	A	reduced rate
29370	C	elevated rate
29377	T	elevated rate
29386	C	elevated rate
29441	C	elevated rate
29466	C	elevated rate
29555	C	elevated rate
29702	G	elevated rate

## Sheet: Sup. Table 5
Sample	POS	REF	adj.depth	indel	indel.rate	indel.adj.p.value	type			Supplementary Table 5
WT	158	A	108406	11	0.00010147	0.03882	elevated rate
WT	173	C	111039	12	0.00010807	0.0148067	elevated rate
WT	235	A	92233	17	0.000184316	9.43679e-07	elevated rate
WT	314	A	86646	14	0.000161577	7.43917e-05	elevated rate
WT	323	G	87667	14	0.000159695	8.46708e-05	elevated rate
WT	330	A	87235	10	0.000114633	0.0302588	elevated rate
WT	443	G	109300	91	0.000832571	1.35455e-94	elevated rate
WT	504	C	145296	26	0.000178945	2.0198e-10	elevated rate
WT	506	C	144494	42	0.00029067	6.44318e-25	elevated rate
WT	507	A	142437	121	0.000849498	3.18058e-127	elevated rate
WT	508	T	144112	16	0.000111025	0.00110281	elevated rate
WT	509	G	141802	1136	0.00801117	0	elevated rate
WT	512	C	141251	25	0.00017699	6.88529e-10	elevated rate
WT	513	A	139945	35	0.000250098	1.34523e-18	elevated rate
WT	514	T	141117	370	0.00262194	0	elevated rate
WT	515	G	140215	214	0.00152623	1.87887e-279	elevated rate
WT	517	T	140079	418	0.00298403	0	elevated rate
WT	518	A	138029	112	0.000811424	1.62316e-115	elevated rate
WT	519	T	139080	30	0.000215703	4.17972e-14	elevated rate
WT	520	G	138080	35	0.000253476	9.16372e-19	elevated rate
WT	594	A	31472	6	0.000190646	0.0373882	elevated rate
WT	668	A	23494	8	0.000340512	0.00011635	elevated rate
WT	683	C	23759	7	0.000294625	0.00124145	elevated rate
WT	685	A	25599	98	0.00382827	1.17646e-165	elevated rate
WT	732	A	20447	5	0.000244535	0.0385774	elevated rate
WT	738	A	19253	6	0.00031164	0.00368715	elevated rate
WT	868	T	21238	5	0.000235427	0.0436999	elevated rate
WT	880	A	29437	10	0.000339709	5.71457e-06	elevated rate
WT	1011	A	36352	7	0.000192562	0.0138673	elevated rate
WT	1036	T	32256	6	0.000186012	0.0412165	elevated rate
WT	1135	G	22844	15	0.000656628	4.07022e-13	elevated rate
WT	1279	A	33470	6	0.000179265	0.0475836	elevated rate
WT	1349	C	54879	13	0.000236885	3.30175e-06	elevated rate
WT	1361	G	57819	8	0.000138363	0.0351308	elevated rate
WT	1363	T	57726	9	0.000155909	0.0077717	elevated rate
WT	1367	A	58059	19	0.000327253	1.21292e-11	elevated rate
WT	1547	A	32883	6	0.000182465	0.0443744	elevated rate
WT	1628	C	10922	6	0.00054935	0.000200713	elevated rate
WT	1800	C	12958	8	0.000617379	1.82655e-06	elevated rate
WT	1813	T	15123	34	0.00224823	9.34928e-49	elevated rate
WT	8299	C	37462	8	0.00021355	0.00257378	elevated rate
WT	8376	C	30908	10	0.000323541	8.87814e-06	elevated rate
WT	8905	C	11958	4	0.000334504	0.0454807	elevated rate
WT	8927	G	13513	9	0.000666025	1.28344e-07	elevated rate
WT	9604	A	10454	6	0.000573943	0.000158461	elevated rate
WT	9943	C	20350	8	0.00039312	4.36228e-05	elevated rate
WT	10594	C	28354	6	0.00021161	0.0244718	elevated rate
WT	10643	G	36713	8	0.000217906	0.00227479	elevated rate
WT	10660	T	36954	23	0.000622395	3.91766e-20	elevated rate
WT	11486	A	13243	5	0.000377558	0.00690428	elevated rate
WT	11521	G	26944	16	0.000593824	2.15905e-13	elevated rate
WT	11531	A	26792	6	0.000223947	0.0188497	elevated rate
WT	11537	A	27804	8	0.000287728	0.000373101	elevated rate
WT	11540	G	28046	15	0.000534836	6.99537e-12	elevated rate
WT	11567	A	38382	12	0.000312647	7.06408e-07	elevated rate
WT	11595	A	41068	7	0.000170449	0.0264581	elevated rate
WT	11613	A	39574	9	0.000227422	0.000540862	elevated rate
WT	11628	A	39001	21	0.000538448	4.54416e-17	elevated rate
WT	11649	G	39305	9	0.000228979	0.000519249	elevated rate
WT	12196	T	15518	6	0.000386648	0.00124145	elevated rate
WT	13121	A	25689	6	0.000233563	0.0153273	elevated rate
WT	13162	T	27093	7	0.000258369	0.00261596	elevated rate
WT	13316	C	11263	5	0.000443931	0.003469	elevated rate
WT	13541	C	12090	4	0.000330852	0.04703	elevated rate
WT	13586	T	10282	4	0.000389029	0.0297105	elevated rate
WT	14681	A	28957	6	0.000207204	0.0264776	elevated rate
WT	15187	A	10251	4	0.000390206	0.0295018	elevated rate
WT	15196	A	10669	4	0.000374918	0.0330051	elevated rate
WT	15199	G	10685	4	0.000374357	0.0330535	elevated rate
WT	15216	C	11271	4	0.000354893	0.0386246	elevated rate
WT	15245	T	50180	10	0.000199283	0.000498795	elevated rate
WT	15259	A	57126	12	0.000210062	3.6527e-05	elevated rate
WT	16168	G	11631	4	0.000343909	0.0421105	elevated rate
WT	16310	T	10032	4	0.000398724	0.0273109	elevated rate
WT	16501	G	21585	7	0.000324299	0.000712829	elevated rate
WT	16508	G	22008	5	0.00022719	0.0490534	elevated rate
WT	16515	T	22029	16	0.000726315	1.09715e-14	elevated rate
WT	16597	A	21162	12	0.000567054	1.21781e-09	elevated rate
WT	16630	C	19351	8	0.000413415	3.09592e-05	elevated rate
WT	16907	A	13222	5	0.000378158	0.00688968	elevated rate
WT	18058	C	11917	6	0.000503482	0.000321005	elevated rate
WT	18138	C	19850	8	0.000403023	3.68301e-05	elevated rate
WT	18289	C	47807	8	0.00016734	0.0119343	elevated rate
WT	18350	A	28045	14	0.000499198	1.10655e-10	elevated rate
WT	18351	T	27640	6	0.000217077	0.0218566	elevated rate
WT	18434	A	21818	9	0.000412503	5.71457e-06	elevated rate
WT	18474	A	24237	6	0.000247555	0.0115831	elevated rate
WT	18629	A	45609	8	0.000175404	0.00895705	elevated rate
WT	18680	C	90415	26	0.000287563	6.54552e-15	elevated rate
WT	18730	A	113234	15	0.000132469	0.000298956	elevated rate
WT	18738	T	101775	11	0.000108082	0.0262875	elevated rate
WT	18742	T	101796	11	0.000108059	0.0262875	elevated rate
WT	18756	G	98228	19	0.000193428	6.00894e-08	elevated rate
WT	18782	G	91759	15	0.000163472	2.77391e-05	elevated rate
WT	18789	A	77851	9	0.000115605	0.0490156	elevated rate
WT	18818	A	84869	16	0.000188526	1.82655e-06	elevated rate
WT	18929	C	69639	9	0.000129238	0.0264776	elevated rate
WT	19044	T	11921	4	0.000335542	0.0451269	elevated rate
WT	19105	T	11197	9	0.000803787	2.89509e-08	elevated rate
WT	19294	T	11446	5	0.000436834	0.00368715	elevated rate
WT	19983	C	24944	247	0.00990218	0	elevated rate
WT	21532	A	26943	14	0.000519615	6.62375e-11	elevated rate
WT	21569	G	44672	19	0.000425322	1.51844e-13	elevated rate
WT	21578	G	48197	14	0.000290475	9.27776e-08	elevated rate
WT	21603	A	51055	8	0.000156694	0.0178434	elevated rate
WT	21627	C	59214	12	0.000202655	5.10103e-05	elevated rate
WT	21629	C	59835	8	0.000133701	0.041503	elevated rate
WT	21634	A	60170	12	0.000199435	5.93183e-05	elevated rate
WT	21651	A	59655	8	0.000134104	0.041011	elevated rate
WT	21654	C	59763	9	0.000150595	0.00988888	elevated rate
WT	21657	T	54799	10	0.000182485	0.00100724	elevated rate
WT	21764	A	47779	13	0.000272086	7.76215e-07	elevated rate
WT	21828	G	50755	8	0.00015762	0.0172296	elevated rate
WT	21890	T	20194	5	0.000247598	0.0369038	elevated rate
WT	23103	C	10577	5	0.000472724	0.00261596	elevated rate
WT	23132	G	11479	4	0.000348462	0.0407156	elevated rate
WT	23230	C	32459	19	0.000585354	5.64085e-16	elevated rate
WT	23308	T	47211	14	0.000296541	7.22722e-08	elevated rate
WT	23334	C	47454	11	0.000231803	4.44054e-05	elevated rate
WT	23469	A	19675	25	0.00127065	2.47003e-29	elevated rate
WT	23483	A	17745	12	0.000676247	1.7277e-10	elevated rate
WT	23492	C	19441	6	0.000308626	0.00386519	elevated rate
WT	23538	C	18415	5	0.000271518	0.0264776	elevated rate
WT	23582	T	12145	17	0.00139975	2.83832e-20	elevated rate
WT	23594	A	10390	4	0.000384986	0.0305083	elevated rate
WT	24223	C	19223	5	0.000260105	0.0308762	elevated rate
WT	24277	G	18555	5	0.000269469	0.0271915	elevated rate
WT	24320	C	17590	9	0.000511654	1.09568e-06	elevated rate
WT	24399	G	12642	5	0.000395507	0.00570175	elevated rate
WT	24435	C	10307	4	0.000388086	0.0298547	elevated rate
WT	25026	A	16426	6	0.000365275	0.00163974	elevated rate
WT	25100	C	13268	12	0.000904432	7.12418e-12	elevated rate
WT	25163	C	13276	8	0.000602591	2.14941e-06	elevated rate
WT	25191	T	12167	4	0.000328758	0.0476242	elevated rate
WT	25549	C	12619	7	0.000554719	2.77391e-05	elevated rate
WT	25555	G	12482	8	0.000640923	1.41525e-06	elevated rate
WT	25572	C	11322	4	0.000353294	0.03882	elevated rate
WT	25587	C	16831	11	0.000653556	2.1852e-09	elevated rate
WT	25660	G	19007	6	0.000315673	0.003469	elevated rate
WT	25703	C	15406	9	0.000584188	3.77931e-07	elevated rate
WT	25721	C	11984	4	0.000333778	0.0456794	elevated rate
WT	26466	G	14950	12	0.000802676	2.62024e-11	elevated rate
WT	26493	G	14646	8	0.000546224	4.2796e-06	elevated rate
WT	26528	A	11561	11	0.000951475	4.74825e-11	elevated rate
WT	26786	A	38701	9	0.000232552	0.000471753	elevated rate
WT	26864	A	23317	7	0.00030021	0.00111983	elevated rate
WT	26923	T	15619	6	0.000384148	0.0012664	elevated rate
WT	26924	A	15459	7	0.000452811	9.40334e-05	elevated rate
WT	26925	G	15473	5	0.000323144	0.0132887	elevated rate
WT	27471	T	31118	7	0.00022495	0.0058486	elevated rate
WT	27691	A	15694	6	0.000382312	0.00129292	elevated rate
WT	27700	A	13079	5	0.000382292	0.00658189	elevated rate
WT	28134	G	49704	9	0.000181072	0.00273888	elevated rate
WT	28146	C	53695	8	0.00014899	0.0240025	elevated rate
WT	28147	C	53375	10	0.000187354	0.000813104	elevated rate
WT	28165	A	53361	25	0.000468507	4.21709e-19	elevated rate
WT	28214	C	39793	17	0.000427211	4.54963e-12	elevated rate
WT	28242	G	42475	17	0.000400235	1.19926e-11	elevated rate
WT	28250	T	46349	8	0.000172604	0.00988888	elevated rate
WT	28253	C	44841	12	0.000267612	3.25795e-06	elevated rate
WT	28375	G	66627	9	0.00013508	0.0204212	elevated rate
WT	28383	C	67601	10	0.000147927	0.00497183	elevated rate
WT	28404	G	61186	17	0.000277841	2.76833e-09	elevated rate
WT	28405	T	60949	11	0.000180479	0.000419117	elevated rate
WT	28406	T	60934	86	0.00141136	1.74356e-108	elevated rate
WT	28407	T	60726	50	0.000823371	4.63168e-51	elevated rate
WT	28465	T	63621	13	0.000204335	1.63742e-05	elevated rate
WT	28513	A	60266	8	0.000132745	0.0431611	elevated rate
WT	28601	T	51173	29	0.000566705	1.36474e-24	elevated rate
WT	28698	C	77157	35	0.000453621	9.5326e-27	elevated rate
WT	28776	C	73141	35	0.000478528	1.72276e-27	elevated rate
WT	28884	G	130446	12	9.19921e-05	0.0475836	elevated rate
WT	28897	T	139972	44	0.000314349	1.72276e-27	elevated rate
WT	28898	A	140645	69	0.000490597	3.36795e-56	elevated rate
WT	28911	A	133723	20	0.000149563	1.24855e-06	elevated rate
WT	28932	C	149007	22	0.000147644	3.00246e-07	elevated rate
WT	28969	C	111947	34	0.000303715	1.64093e-20	elevated rate
WT	28987	C	119290	18	0.000150893	5.6026e-06	elevated rate
WT	29051	C	113687	124	0.00109071	1.88455e-143	elevated rate
WT	29067	C	108011	27	0.000249975	4.24139e-14	elevated rate
WT	29069	A	107865	25	0.000231771	2.71625e-12	elevated rate
WT	29072	G	106178	11	0.0001036	0.0341836	elevated rate
WT	29074	A	106306	18	0.000169323	1.15378e-06	elevated rate
WT	29075	T	106359	20	0.000188042	3.49934e-08	elevated rate
WT	29077	C	105329	16	0.000151905	2.77391e-05	elevated rate
WT	29078	A	105538	18	0.000170555	1.05819e-06	elevated rate
WT	29080	T	105613	25	0.000236713	1.74514e-12	elevated rate
WT	29081	G	104988	12	0.000114299	0.00931281	elevated rate
WT	29083	A	107121	14	0.000130693	0.000712829	elevated rate
WT	29091	C	107149	11	0.000102661	0.0362737	elevated rate
WT	29304	C	81912	14	0.000170915	4.06242e-05	elevated rate
WT	29311	C	82375	20	0.000242792	4.71176e-10	elevated rate
WT	29317	T	82490	12	0.000145472	0.00114404	elevated rate
WT	29324	A	78764	17	0.000215835	1.03151e-07	elevated rate
WT	29353	C	76369	13	0.000170226	0.000106084	elevated rate
WT	29358	C	74850	11	0.000146961	0.00231737	elevated rate
WT	29363	C	72368	11	0.000152001	0.00173506	elevated rate
WT	29366	C	62701	12	0.000191385	8.82118e-05	elevated rate
WT	29370	C	64593	16	0.000247705	5.28846e-08	elevated rate
WT	29377	T	63160	19	0.000300823	4.82873e-11	elevated rate
WT	29386	C	58772	19	0.000323283	1.46896e-11	elevated rate
WT	29580	C	11012	7	0.00063567	1.17191e-05	elevated rate

## Sheet: Sup. Table 6
Sample	POS	REF	adj.depth	indel	indel.rate	indel.adj.p.value	type			Supplementary Table 6
Alpha	113	A	30295	6	0.000198052	0.0378387	elevated rate
Alpha	235	A	44392	7	0.000157686	0.0461997	elevated rate
Alpha	239	T	44326	14	0.000315842	5.21384e-08	elevated rate
Alpha	240	T	44330	13	0.000293255	5.13883e-07	elevated rate
Alpha	314	A	45375	11	0.000242424	4.26464e-05	elevated rate
Alpha	323	G	45562	11	0.000241429	4.37193e-05	elevated rate
Alpha	415	T	65741	9	0.000136901	0.0236047	elevated rate
Alpha	434	G	71060	21	0.000295525	7.41041e-12	elevated rate
Alpha	443	G	61523	79	0.00128407	9.56533e-95	elevated rate
Alpha	504	C	70149	41	0.00058447	4.54508e-35	elevated rate
Alpha	506	C	69558	36	0.000517554	6.9896e-29	elevated rate
Alpha	507	A	68695	103	0.00149938	1.06561e-130	elevated rate
Alpha	508	T	69068	14	0.000202699	9.80774e-06	elevated rate
Alpha	509	G	68398	1070	0.0156437	0	elevated rate
Alpha	512	C	67553	22	0.00032567	2.82452e-13	elevated rate
Alpha	513	A	66987	24	0.000358278	1.95822e-15	elevated rate
Alpha	514	T	67081	189	0.00281749	2.59454e-292	elevated rate
Alpha	515	G	66700	245	0.00367316	0	elevated rate
Alpha	517	T	66251	516	0.00778856	0	elevated rate
Alpha	518	A	65543	88	0.00134263	2.35215e-107	elevated rate
Alpha	520	G	65432	29	0.000443208	3.06476e-21	elevated rate
Alpha	668	A	18284	6	0.000328156	0.00332362	elevated rate
Alpha	683	C	18072	13	0.000719345	1.33642e-11	elevated rate
Alpha	685	A	18742	450	0.0240102	0	elevated rate
Alpha	691	A	18464	5	0.000270797	0.0307833	elevated rate
Alpha	1011	A	25735	9	0.000349718	2.88228e-05	elevated rate
Alpha	1026	C	24642	7	0.000284068	0.00188707	elevated rate
Alpha	1135	G	16975	7	0.000412371	0.00021122	elevated rate
Alpha	1205	C	11115	4	0.000359874	0.0413424	elevated rate
Alpha	1269	A	27198	9	0.000330907	4.28098e-05	elevated rate
Alpha	1349	C	43526	10	0.000229748	0.000216795	elevated rate
Alpha	1367	A	45427	14	0.000308187	7.04892e-08	elevated rate
Alpha	1378	A	44204	9	0.000203601	0.00158258	elevated rate
Alpha	1628	C	11992	10	0.000833889	2.45892e-09	elevated rate
Alpha	1800	C	11949	5	0.000418445	0.00507576	elevated rate
Alpha	1813	T	15560	50	0.00321337	4.38974e-79	elevated rate
Alpha	1866	A	19736	5	0.000253344	0.0390345	elevated rate
Alpha	1931	C	17837	5	0.000280316	0.0266186	elevated rate
Alpha	5224	T	11762	8	0.000680156	1.12809e-06	elevated rate
Alpha	7032	A	14374	5	0.00034785	0.010856	elevated rate
Alpha	7203	C	10247	4	0.000390358	0.0320112	elevated rate
Alpha	7246	G	11709	6	0.000512426	0.000342221	elevated rate
Alpha	7777	C	10375	5	0.000481928	0.00273964	elevated rate
Alpha	8160	C	10885	6	0.000551217	0.000234533	elevated rate
Alpha	8249	G	36163	14	0.000387136	4.11506e-09	elevated rate
Alpha	8281	C	38534	11	0.000285462	9.77635e-06	elevated rate
Alpha	8358	A	37098	7	0.000188689	0.0184885	elevated rate
Alpha	8376	C	33584	15	0.000446641	1.1339e-10	elevated rate
Alpha	8731	T	13644	158	0.0115802	0	elevated rate
Alpha	8763	A	14877	12	0.000806614	3.24114e-11	elevated rate
Alpha	8764	T	14890	6	0.000402955	0.0011966	elevated rate
Alpha	8767	T	14779	6	0.000405981	0.00115396	elevated rate
Alpha	8927	G	15227	12	0.000788074	4.18088e-11	elevated rate
Alpha	8952	G	15880	7	0.000440806	0.000141102	elevated rate
Alpha	9082	A	12164	5	0.000411049	0.00546553	elevated rate
Alpha	9604	A	17565	6	0.000341588	0.00273964	elevated rate
Alpha	9627	C	15152	23	0.00151795	2.42837e-28	elevated rate
Alpha	10046	G	24920	12	0.000481541	1.0077e-08	elevated rate
Alpha	10519	C	16302	5	0.000306711	0.0184885	elevated rate
Alpha	10527	C	15472	9	0.000581696	5.13883e-07	elevated rate
Alpha	10594	C	35554	10	0.000281262	4.07321e-05	elevated rate
Alpha	10643	G	40575	11	0.000271103	1.56316e-05	elevated rate
Alpha	10652	A	41135	8	0.000194482	0.0058831	elevated rate
Alpha	10660	T	41177	46	0.00111713	6.47721e-52	elevated rate
Alpha	10664	G	41139	8	0.000194463	0.0058831	elevated rate
Alpha	10835	G	12195	6	0.000492005	0.000423147	elevated rate
Alpha	11279	A	16986	9	0.000529848	1.0632e-06	elevated rate
Alpha	11282	A	16836	17	0.00100974	8.9968e-18	elevated rate
Alpha	11486	A	10764	5	0.000464511	0.00319494	elevated rate
Alpha	11491	T	11955	14	0.00117106	2.37753e-15	elevated rate
Alpha	11521	G	26197	29	0.001107	3.7751e-32	elevated rate
Alpha	11540	G	27732	7	0.000252416	0.00364327	elevated rate
Alpha	11567	A	37320	8	0.000214362	0.00315445	elevated rate
Alpha	11613	A	41892	20	0.000477418	5.28505e-15	elevated rate
Alpha	11616	G	41940	14	0.00033381	2.65989e-08	elevated rate
Alpha	11628	A	41814	29	0.000693548	1.50831e-26	elevated rate
Alpha	11629	T	41909	7	0.000167029	0.0349218	elevated rate
Alpha	11630	T	42176	7	0.000165971	0.0358463	elevated rate
Alpha	11658	G	40556	11	0.00027123	1.56316e-05	elevated rate
Alpha	11697	A	34280	7	0.000204201	0.0119063	elevated rate
Alpha	11699	G	33936	8	0.000235738	0.00173555	elevated rate
Alpha	11700	A	33774	11	0.000325694	2.72635e-06	elevated rate
Alpha	12186	A	17306	9	0.000520051	1.19868e-06	elevated rate
Alpha	12196	T	19248	5	0.000259767	0.0354681	elevated rate
Alpha	12762	A	13504	13	0.000962678	3.79048e-13	elevated rate
Alpha	13117	A	14084	5	0.000355013	0.0100117	elevated rate
Alpha	13142	A	22900	7	0.000305677	0.00122871	elevated rate
Alpha	13459	G	14834	21	0.00141567	3.60604e-25	elevated rate
Alpha	13461	T	14455	6	0.000415081	0.00103054	elevated rate
Alpha	13462	T	14433	9	0.000623571	2.92026e-07	elevated rate
Alpha	13612	G	12208	6	0.000491481	0.000423147	elevated rate
Alpha	14407	C	10352	12	0.0011592	5.45841e-13	elevated rate
Alpha	14540	G	37207	12	0.00032252	7.30055e-07	elevated rate
Alpha	14599	C	44739	16	0.00035763	4.91748e-10	elevated rate
Alpha	14643	T	42070	7	0.000166389	0.0354681	elevated rate
Alpha	14717	A	20175	5	0.000247831	0.0422506	elevated rate
Alpha	15157	C	10575	5	0.000472813	0.0029682	elevated rate
Alpha	15187	A	11705	4	0.000341734	0.0490393	elevated rate
Alpha	15199	G	12223	6	0.000490878	0.000423436	elevated rate
Alpha	15201	A	12201	7	0.000573723	2.81477e-05	elevated rate
Alpha	15245	T	41727	13	0.000311549	2.62375e-07	elevated rate
Alpha	15259	A	46468	17	0.000365843	7.30816e-11	elevated rate
Alpha	15442	A	36214	7	0.000193295	0.016354	elevated rate
Alpha	16300	A	17338	7	0.000403737	0.000234533	elevated rate
Alpha	16317	T	20239	5	0.000247048	0.0425434	elevated rate
Alpha	16431	A	26751	6	0.000224291	0.021441	elevated rate
Alpha	16501	G	30128	7	0.000232342	0.0058831	elevated rate
Alpha	16510	T	30802	7	0.000227258	0.00662245	elevated rate
Alpha	16515	T	30933	9	0.000290951	0.000117234	elevated rate
Alpha	16597	A	29361	17	0.000578999	6.02577e-14	elevated rate
Alpha	16618	G	24472	9	0.000367767	1.94222e-05	elevated rate
Alpha	16630	C	25456	11	0.000432118	1.86931e-07	elevated rate
Alpha	16907	A	17456	7	0.000401008	0.000243192	elevated rate
Alpha	17274	C	11116	4	0.000359842	0.0413424	elevated rate
Alpha	17344	A	10903	4	0.000366872	0.0390345	elevated rate
Alpha	17389	A	10075	4	0.000397022	0.0308801	elevated rate
Alpha	17601	G	10864	7	0.00064433	1.35997e-05	elevated rate
Alpha	18138	C	22607	6	0.000265405	0.0095785	elevated rate
Alpha	18215	G	53884	8	0.000148467	0.0303616	elevated rate
Alpha	18314	A	53773	12	0.00022316	3.00077e-05	elevated rate
Alpha	18350	A	39965	24	0.000600525	2.32625e-20	elevated rate
Alpha	18351	T	39172	7	0.000178699	0.0247702	elevated rate
Alpha	18434	A	33267	11	0.000330658	2.36216e-06	elevated rate
Alpha	18541	C	31474	6	0.000190634	0.0444561	elevated rate
Alpha	18659	G	76101	17	0.000223387	1.11612e-07	elevated rate
Alpha	18680	C	87769	20	0.000227871	2.56508e-09	elevated rate
Alpha	18730	A	107538	28	0.000260373	9.7886e-15	elevated rate
Alpha	18736	T	100703	13	0.000129092	0.00235528	elevated rate
Alpha	18739	G	100651	23	0.000228512	7.36849e-11	elevated rate
Alpha	18742	T	100281	41	0.000408851	3.91871e-29	elevated rate
Alpha	18747	C	99621	12	0.000120457	0.0083385	elevated rate
Alpha	18782	G	90111	12	0.000133169	0.00350602	elevated rate
Alpha	18789	A	80766	15	0.000185722	9.92816e-06	elevated rate
Alpha	18816	G	81193	18	0.000221694	3.98963e-08	elevated rate
Alpha	18818	A	81277	37	0.000455233	8.18095e-28	elevated rate
Alpha	19294	T	14699	8	0.000544255	5.819e-06	elevated rate
Alpha	19368	A	14223	5	0.000351543	0.0104325	elevated rate
Alpha	19918	G	11753	4	0.000340339	0.0494334	elevated rate
Alpha	19983	C	23678	240	0.010136	0	elevated rate
Alpha	21532	A	22107	19	0.000859456	1.04003e-18	elevated rate
Alpha	21569	G	39271	9	0.000229177	0.000669869	elevated rate
Alpha	21578	G	41388	10	0.000241616	0.000144602	elevated rate
Alpha	21603	A	44418	8	0.000180107	0.00944689	elevated rate
Alpha	21654	C	54238	11	0.00020281	0.000213036	elevated rate
Alpha	21701	G	42292	8	0.000189161	0.00693363	elevated rate
Alpha	21736	C	49649	8	0.000161131	0.0184885	elevated rate
Alpha	21761	G	47948	23	0.000479686	2.13606e-17	elevated rate
Alpha	21762	C	47752	238	0.00498408	0	elevated rate
Alpha	21817	A	44722	8	0.000178883	0.0098079	elevated rate
Alpha	21830	G	43240	7	0.000161887	0.0406079	elevated rate
Alpha	21890	T	12632	6	0.000474984	0.000507437	elevated rate
Alpha	22383	C	23434	6	0.000256038	0.0112763	elevated rate
Alpha	22510	T	10678	10	0.000936505	8.19487e-10	elevated rate
Alpha	23230	C	16525	9	0.000544629	8.48686e-07	elevated rate
Alpha	23308	T	25694	8	0.000311357	0.000273321	elevated rate
Alpha	23334	C	27794	9	0.000323811	5.0446e-05	elevated rate
Alpha	23467	T	15953	5	0.000313421	0.0169858	elevated rate
Alpha	23469	A	15661	10	0.000638529	2.94457e-08	elevated rate
Alpha	23486	G	17639	6	0.000340155	0.00277995	elevated rate
Alpha	23538	C	18522	5	0.000269949	0.030976	elevated rate
Alpha	23582	T	14433	169	0.0117093	0	elevated rate
Alpha	24140	G	14387	5	0.000347536	0.010856	elevated rate
Alpha	24223	C	20972	5	0.000238413	0.0492082	elevated rate
Alpha	24263	C	21228	6	0.000282646	0.00698922	elevated rate
Alpha	24320	C	23993	9	0.000375109	1.66026e-05	elevated rate
Alpha	25100	C	14654	6	0.000409445	0.00110653	elevated rate
Alpha	25587	C	29265	17	0.000580899	5.82242e-14	elevated rate
Alpha	25699	G	30636	6	0.000195848	0.0396222	elevated rate
Alpha	25703	C	29321	8	0.000272842	0.000663068	elevated rate
Alpha	26307	T	14406	32	0.0022213	4.70046e-45	elevated rate
Alpha	26408	C	20514	8	0.000389978	5.85623e-05	elevated rate
Alpha	26449	A	19813	7	0.000353303	0.000518484	elevated rate
Alpha	26466	G	18883	12	0.000635492	4.72919e-10	elevated rate
Alpha	26478	C	18643	5	0.000268197	0.031529	elevated rate
Alpha	26493	G	17119	9	0.000525732	1.11402e-06	elevated rate
Alpha	26528	A	12680	5	0.000394322	0.00648301	elevated rate
Alpha	26530	A	11354	5	0.000440373	0.0040294	elevated rate
Alpha	26616	A	10791	4	0.000370679	0.0378387	elevated rate
Alpha	26864	A	20377	8	0.000392599	5.61225e-05	elevated rate
Alpha	27578	A	38803	17	0.00043811	4.77993e-12	elevated rate
Alpha	27691	A	12293	7	0.00056943	2.91164e-05	elevated rate
Alpha	28064	A	25340	7	0.000276243	0.00218134	elevated rate
Alpha	28147	C	28426	32	0.00112573	8.12307e-36	elevated rate
Alpha	28165	A	28614	11	0.000384427	5.75351e-07	elevated rate
Alpha	28237	G	20545	48	0.00233633	2.66074e-69	elevated rate
Alpha	28239	G	19845	17	0.000856639	1.26142e-16	elevated rate
Alpha	28242	G	14275	15	0.00105079	7.81856e-16	elevated rate
Alpha	28253	C	23724	15	0.000632271	9.76356e-13	elevated rate
Alpha	28269	C	42312	64	0.00151257	6.03343e-81	elevated rate
Alpha	28279	T	41633	8	0.000192155	0.00634078	elevated rate
Alpha	28356	A	59035	16	0.000271026	2.52067e-08	elevated rate
Alpha	28406	T	49729	83	0.00166905	7.93344e-109	elevated rate
Alpha	28407	T	49586	43	0.00086718	7.00179e-44	elevated rate
Alpha	28512	C	57841	10	0.000172888	0.00203305	elevated rate
Alpha	28513	A	57467	10	0.000174013	0.00193486	elevated rate
Alpha	28520	C	58060	10	0.000172236	0.00208775	elevated rate
Alpha	28601	T	44435	13	0.000292562	5.22336e-07	elevated rate
Alpha	28680	A	54376	8	0.000147124	0.031529	elevated rate
Alpha	28698	C	52946	11	0.000207759	0.000173953	elevated rate
Alpha	28776	C	43184	9	0.000208411	0.00134773	elevated rate
Alpha	28878	G	26922	9	0.000334299	4.05886e-05	elevated rate
Alpha	28880	A	26035	13	0.000499328	1.03839e-09	elevated rate
Alpha	28898	A	30426	8	0.000262933	0.000850677	elevated rate
Alpha	28969	C	45874	12	0.000261586	6.22095e-06	elevated rate
Alpha	28975	G	46415	15	0.000323171	9.16999e-09	elevated rate
Alpha	28976	T	46526	10	0.000214934	0.000367267	elevated rate
Alpha	29031	A	58036	24	0.000413536	9.01859e-17	elevated rate
Alpha	29051	C	59257	61	0.00102941	3.40525e-67	elevated rate
Alpha	29067	C	59393	19	0.000319903	3.07904e-11	elevated rate
Alpha	29069	A	59487	20	0.000336208	3.04508e-12	elevated rate
Alpha	29074	A	59400	14	0.00023569	1.68004e-06	elevated rate
Alpha	29081	G	47935	8	0.000166893	0.015103	elevated rate
Alpha	29083	A	48532	8	0.00016484	0.0163484	elevated rate
Alpha	29127	A	46057	9	0.00019541	0.0020991	elevated rate
Alpha	29162	G	41028	7	0.000170615	0.031529	elevated rate
Alpha	29270	T	79405	11	0.00013853	0.0052021	elevated rate
Alpha	29296	C	73742	10	0.000135608	0.0122769	elevated rate
Alpha	29311	C	69328	10	0.000144242	0.00793037	elevated rate
Alpha	29324	A	64973	15	0.000230865	7.02415e-07	elevated rate
Alpha	29377	T	56955	25	0.000438943	4.27101e-18	elevated rate
Alpha	29386	C	54216	23	0.000424229	2.75369e-16	elevated rate
Alpha	29478	A	46844	10	0.000213475	0.000387356	elevated rate

## Sheet: Sup. Table 7
POS	REF	adj.depth	all	all.rate	all.adj.p.value	type			Supplementary Table 7
37	C	12252	11	0.000897813	0.00481291	elevated rate
63	G	15777	13	0.000823984	0.00330606	elevated rate
87	G	10710	10	0.000933707	0.00635051	elevated rate
98	G	11080	13	0.00117329	0.000136928	elevated rate
100	G	23310	16	0.000686401	0.00459102	elevated rate
102	G	23510	35	0.00148873	8.70615e-15	elevated rate
107	T	24588	27	0.0010981	1.1837e-08	elevated rate
108	G	24663	24	0.000973118	9.26591e-07	elevated rate
130	C	36180	1	2.76396e-05	0.0435985	reduced rate
137	A	34956	0	0	0.0119641	reduced rate
150	T	36392	58	0.00159376	5.71955e-26	elevated rate
156	A	35007	0	0	0.0119814	reduced rate
162	G	33088	39	0.00117868	2.35029e-13	elevated rate
180	G	21651	42	0.00193986	8.28532e-22	elevated rate
198	G	12609	11	0.000872393	0.00583998	elevated rate
215	T	14778	10	0.000676682	0.0439199	elevated rate
216	G	15610	16	0.00102498	6.72949e-05	elevated rate
221	T	15337	11	0.00071722	0.0226662	elevated rate
222	G	15388	16	0.00103977	5.72159e-05	elevated rate
229	T	16232	16	0.000985707	0.000104977	elevated rate
240	G	17839	32	0.00179382	1.29528e-15	elevated rate
245	G	19138	27	0.00141081	6.37705e-11	elevated rate
264	G	18306	20	0.00109254	2.01076e-06	elevated rate
287	G	19187	16	0.000833898	0.000634349	elevated rate
292	G	20198	26	0.00128726	1.08544e-09	elevated rate
306	G	28211	23	0.000815285	2.60929e-05	elevated rate
311	T	24915	16	0.000642183	0.00832265	elevated rate
324	G	25735	20	0.000777152	0.000208684	elevated rate
340	G	28814	18	0.000624696	0.00561477	elevated rate
366	G	23082	18	0.000779828	0.000507142	elevated rate
368	T	23226	18	0.000774994	0.00054177	elevated rate
399	G	20319	20	0.0009843	9.02288e-06	elevated rate
408	G	29569	23	0.000777842	5.19745e-05	elevated rate
414	G	30161	53	0.00175724	1.24588e-25	elevated rate
434	T	27350	0	0	0.0380627	reduced rate
444	G	26136	16	0.000612182	0.0129316	elevated rate
461	G	22056	20	0.000906783	2.77491e-05	elevated rate
476	T	16203	13	0.000802321	0.00414868	elevated rate
531	G	19642	21	0.00106914	1.41059e-06	elevated rate
559	G	30221	16	0.000529433	0.0489872	elevated rate
567	G	30802	35	0.00113629	1.45848e-11	elevated rate
577	T	32465	20	0.000616048	0.00348442	elevated rate
578	T	32524	44	0.00135285	4.63569e-17	elevated rate
581	T	32809	28	0.000853424	9.66281e-07	elevated rate
582	G	32897	23	0.000699152	0.000238171	elevated rate
587	A	34287	0	0	0.0113168	reduced rate
590	T	34030	20	0.000587717	0.00575151	elevated rate
591	G	34059	24	0.00070466	0.000143559	elevated rate
611	T	19881	15	0.000754489	0.00281067	elevated rate
620	T	19874	25	0.00125792	3.75902e-09	elevated rate
621	G	20002	16	0.00079992	0.000972949	elevated rate
633	G	20018	22	0.00109901	4.7097e-07	elevated rate
639	G	19315	13	0.000673052	0.0163357	elevated rate
646	G	17123	15	0.000876015	0.000644746	elevated rate
656	T	20862	15	0.000719011	0.00442584	elevated rate
697	G	21739	13	0.000598004	0.0370617	elevated rate
701	T	20956	23	0.00109754	2.38269e-07	elevated rate
702	G	20861	22	0.0010546	9.21653e-07	elevated rate
717	T	28736	25	0.000869989	3.25797e-06	elevated rate
718	G	28887	17	0.0005885	0.0135886	elevated rate
728	C	37184	1	2.68933e-05	0.044758	reduced rate
741	G	36067	28	0.000776333	5.35809e-06	elevated rate
786	G	20552	25	0.00121643	7.31759e-09	elevated rate
792	A	29133	0	0	0.0283597	reduced rate
793	A	28747	0	0	0.0401573	reduced rate
800	T	27314	20	0.000732225	0.00045192	elevated rate
801	G	27275	34	0.00124656	2.67669e-12	elevated rate
808	G	27301	19	0.000695945	0.00122076	elevated rate
838	G	26562	15	0.000564717	0.0322209	elevated rate
847	T	24735	15	0.000606428	0.0189914	elevated rate
850	T	24655	14	0.000567836	0.0394227	elevated rate
855	G	19881	14	0.00070419	0.00784693	elevated rate
881	T	11990	10	0.000834028	0.0134041	elevated rate
921	G	24520	21	0.000856444	3.48537e-05	elevated rate
926	G	25170	29	0.00115217	1.03311e-09	elevated rate
928	G	25339	21	0.000828762	5.5204e-05	elevated rate
932	T	25121	15	0.00059711	0.0216854	elevated rate
936	T	26554	15	0.000564887	0.0322209	elevated rate
941	T	26360	15	0.000569044	0.0303361	elevated rate
942	G	25010	33	0.00131947	1.49818e-12	elevated rate
950	C	24553	36	0.00146622	5.26519e-15	elevated rate
954	G	25630	55	0.00214592	9.40972e-31	elevated rate
963	G	17407	23	0.00132131	8.25712e-09	elevated rate
976	G	29643	29	0.000978309	3.35948e-08	elevated rate
979	G	29599	130	0.00439204	2.37259e-110	elevated rate
982	A	30095	0	0	0.0298574	reduced rate
991	T	30314	18	0.000593785	0.00927933	elevated rate
997	A	31662	0	0	0.0225143	reduced rate
1004	A	27996	0	0	0.0386878	reduced rate
1027	T	33044	0	0	0.0160546	reduced rate
1033	G	33754	18	0.00053327	0.0291687	elevated rate
1035	G	33140	17	0.000512975	0.0453643	elevated rate
1040	T	22371	21	0.000938715	9.6131e-06	elevated rate
1058	T	23214	23	0.000990781	1.26865e-06	elevated rate
1061	G	25470	44	0.00172752	5.62053e-21	elevated rate
1067	T	25074	15	0.000598229	0.0214762	elevated rate
1077	G	25284	33	0.00130517	1.89091e-12	elevated rate
1104	G	14281	16	0.00112037	2.53683e-05	elevated rate
1127	T	11679	10	0.000856238	0.0113032	elevated rate
1136	G	11072	10	0.000903179	0.00800644	elevated rate
1158	G	14668	14	0.000954459	0.000506756	elevated rate
1190	G	16122	11	0.000682297	0.0302029	elevated rate
1200	G	17902	31	0.00173165	8.70615e-15	elevated rate
1206	T	15619	11	0.00070427	0.025079	elevated rate
1215	G	17033	41	0.00240709	1.12754e-24	elevated rate
1224	G	21373	34	0.00159079	3.85192e-15	elevated rate
1226	G	19737	19	0.000962659	2.28231e-05	elevated rate
1239	G	19321	19	0.000983386	1.72497e-05	elevated rate
1253	T	17996	13	0.000722383	0.00939458	elevated rate
1257	G	17744	55	0.00309964	1.40394e-38	elevated rate
1259	T	18043	21	0.00116389	3.94956e-07	elevated rate
1270	G	16980	19	0.00111896	2.94323e-06	elevated rate
1285	G	14304	12	0.000838926	0.00474937	elevated rate
1291	G	13829	11	0.00079543	0.0113032	elevated rate
1292	G	13883	18	0.00129655	9.0113e-07	elevated rate
1309	G	16531	12	0.000725909	0.0137362	elevated rate
1329	G	17905	17	0.000949455	8.78696e-05	elevated rate
1333	G	19050	13	0.000682415	0.014697	elevated rate
1351	G	19262	22	0.00114215	2.51393e-07	elevated rate
1353	G	18135	30	0.00165426	8.0182e-14	elevated rate
1361	G	15834	11	0.000694708	0.0272215	elevated rate
1362	G	15762	12	0.000761325	0.00960568	elevated rate
1383	C	16879	11	0.000651697	0.0393284	elevated rate
1387	G	17047	16	0.000938582	0.000179856	elevated rate
1410	G	13855	17	0.00122699	3.87951e-06	elevated rate
1447	G	19086	15	0.000785916	0.00186416	elevated rate
1492	T	16433	11	0.000669385	0.0336913	elevated rate
1493	G	16957	11	0.0006487	0.0398991	elevated rate
1537	T	16375	11	0.000671756	0.0330147	elevated rate
1584	G	16867	15	0.00088931	0.000559085	elevated rate
1587	G	18765	17	0.000905942	0.000150763	elevated rate
1590	G	22729	18	0.00079194	0.000437277	elevated rate
1593	G	23830	23	0.00096517	1.88083e-06	elevated rate
1600	G	24191	14	0.000578728	0.0350133	elevated rate
1635	T	23147	14	0.00060483	0.0258519	elevated rate
1638	G	22322	63	0.00282233	8.26344e-42	elevated rate
1643	G	21722	22	0.0010128	1.66918e-06	elevated rate
1652	T	18764	18	0.000959284	4.2122e-05	elevated rate
1654	G	18829	12	0.000637315	0.0328855	elevated rate
1656	G	16993	19	0.00111811	2.94323e-06	elevated rate
1671	G	12221	23	0.00188201	1.1581e-11	elevated rate
1692	G	12517	12	0.000958696	0.0016108	elevated rate
1710	G	11738	18	0.00153348	8.08353e-08	elevated rate
1733	T	12247	11	0.000898179	0.00481291	elevated rate
1750	G	13709	15	0.00109417	6.46195e-05	elevated rate
1756	G	11912	15	0.00125923	1.43953e-05	elevated rate
1782	T	21176	16	0.000755572	0.0017618	elevated rate
1801	G	21396	15	0.000701066	0.00549127	elevated rate
1805	T	22140	13	0.000587173	0.0407325	elevated rate
1809	G	23076	18	0.000780031	0.000507142	elevated rate
1810	G	23149	19	0.00082077	0.000170502	elevated rate
1829	T	21467	13	0.000605581	0.0336913	elevated rate
1831	G	18756	12	0.000639795	0.0322209	elevated rate
1839	G	16697	11	0.000658801	0.0372927	elevated rate
1845	G	17719	54	0.00304758	1.47987e-37	elevated rate
1855	G	17701	13	0.000734422	0.00831023	elevated rate
1878	G	15678	13	0.000829187	0.00314743	elevated rate
1884	G	17315	15	0.000866301	0.000721121	elevated rate
1899	G	21181	33	0.001558	1.71304e-14	elevated rate
1904	G	20857	17	0.000815074	0.000506756	elevated rate
1914	G	18725	19	0.00101469	1.12255e-05	elevated rate
1920	G	18092	14	0.000773823	0.00349675	elevated rate
1959	G	17655	13	0.000736335	0.00819236	elevated rate
1980	G	18106	15	0.000828455	0.00113335	elevated rate
1983	T	17311	13	0.000750968	0.00696338	elevated rate
1991	G	16690	14	0.000838826	0.0016881	elevated rate
2004	G	13339	11	0.00082465	0.00871783	elevated rate
2022	G	14318	31	0.00216511	3.00605e-17	elevated rate
2059	G	18094	14	0.000773737	0.00349675	elevated rate
2115	G	15238	15	0.000984381	0.000198865	elevated rate
2150	T	11311	9	0.000795686	0.0282916	elevated rate
2187	T	12469	9	0.00072179	0.0451427	elevated rate
2207	T	12308	9	0.000731232	0.0426077	elevated rate
2220	G	12302	24	0.0019509	1.74641e-12	elevated rate
2241	G	14119	15	0.0010624	8.86908e-05	elevated rate
2247	G	14380	17	0.0011822	6.22508e-06	elevated rate
2332	T	12446	9	0.000723124	0.044758	elevated rate
2343	G	10803	11	0.00101824	0.00184088	elevated rate
2355	G	16250	16	0.000984615	0.000105518	elevated rate
2372	A	27842	0	0	0.0384597	reduced rate
2397	G	26637	29	0.00108871	3.35462e-09	elevated rate
2409	G	27050	25	0.000924214	1.22074e-06	elevated rate
2416	A	28876	0	0	0.0283174	reduced rate
2417	T	22855	14	0.000612557	0.0237975	elevated rate
2419	T	22789	15	0.000658212	0.00939458	elevated rate
2424	G	22812	14	0.000613712	0.0235945	elevated rate
2472	G	15134	13	0.000858993	0.00228752	elevated rate
2476	G	15422	14	0.000907794	0.000787927	elevated rate
2532	G	15607	11	0.000704812	0.0250288	elevated rate
2572	T	14695	11	0.000748554	0.0169707	elevated rate
2573	G	14590	19	0.00130226	3.61053e-07	elevated rate
2576	T	14396	15	0.00104196	0.000107927	elevated rate
2600	T	21363	15	0.000702149	0.00543227	elevated rate
2601	G	21508	17	0.000790404	0.000686276	elevated rate
2616	G	27208	23	0.00084534	1.53087e-05	elevated rate
2619	T	27947	67	0.0023974	2.59957e-40	elevated rate
2625	A	28759	0	0	0.0283174	reduced rate
2628	G	28973	21	0.000724813	0.000333071	elevated rate
2637	G	29309	18	0.000614146	0.00664284	elevated rate
2645	T	29134	18	0.000617835	0.00625867	elevated rate
2649	G	27529	27	0.000980784	1.19729e-07	elevated rate
2661	G	23132	34	0.00146983	3.09726e-14	elevated rate
2680	G	20514	19	0.000926197	3.64999e-05	elevated rate
2688	G	18132	12	0.000661813	0.025915	elevated rate
2701	A	17783	15	0.000843502	0.000940127	elevated rate
2712	G	16714	15	0.000897451	0.000511348	elevated rate
2715	A	16501	12	0.000727229	0.0135971	elevated rate
2719	G	14422	12	0.000832062	0.00497686	elevated rate
2741	T	15713	15	0.000954624	0.00027319	elevated rate
2745	C	13763	10	0.000726586	0.0302591	elevated rate
2787	G	11614	11	0.000947133	0.00326884	elevated rate
2820	G	10688	14	0.00130988	2.12774e-05	elevated rate
2855	T	15702	15	0.000955292	0.0002731	elevated rate
2868	G	18242	19	0.00104155	7.87436e-06	elevated rate
2889	G	21119	15	0.000710261	0.00487101	elevated rate
2891	G	20350	13	0.000638821	0.0238751	elevated rate
2907	G	17895	24	0.00134116	2.64841e-09	elevated rate
2931	G	17218	12	0.000696945	0.0185516	elevated rate
2956	T	28170	16	0.00056798	0.0242509	elevated rate
2980	G	27980	20	0.000714796	0.000587799	elevated rate
2985	G	28087	16	0.000569659	0.0237975	elevated rate
2992	A	28591	0	0	0.039701	reduced rate
2993	T	28453	0	0	0.0394227	reduced rate
2997	G	26217	49	0.00186902	8.18654e-25	elevated rate
3007	G	26737	15	0.00056102	0.0336913	elevated rate
3016	G	21037	18	0.000855635	0.000170502	elevated rate
3027	G	10738	11	0.0010244	0.0017618	elevated rate
3078	G	15316	25	0.00163228	2.1146e-11	elevated rate
3090	G	14818	30	0.00202456	6.16144e-16	elevated rate
3118	G	21366	27	0.00126369	6.99549e-10	elevated rate
3125	T	23972	18	0.000750876	0.000763814	elevated rate
3129	C	24688	16	0.000648088	0.00777544	elevated rate
3141	G	25663	24	0.000935199	1.73588e-06	elevated rate
3145	G	27385	17	0.000620778	0.00825916	elevated rate
3150	T	28150	0	0	0.0388556	reduced rate
3151	G	28515	23	0.000806593	3.03212e-05	elevated rate
3153	G	29297	16	0.000546131	0.0427747	elevated rate
3163	A	32032	0	0	0.0153359	reduced rate
3176	A	30338	0	0	0.0303361	reduced rate
3177	C	30601	23	0.000751609	8.60049e-05	elevated rate
3179	T	28094	16	0.000569517	0.0237975	elevated rate
3180	T	27929	20	0.000716102	0.000577158	elevated rate
3184	G	27320	0	0	0.0380627	reduced rate
3201	G	17944	19	0.00105885	6.22508e-06	elevated rate
3221	C	37654	0	0	0.00598407	reduced rate
3237	G	36916	35	0.000948098	1.56161e-09	elevated rate
3242	T	35781	23	0.000642799	0.000739193	elevated rate
3249	G	36220	22	0.000607399	0.00215108	elevated rate
3254	A	36511	1	2.7389e-05	0.0437826	reduced rate
3256	G	35624	19	0.000533348	0.0233213	elevated rate
3258	G	35988	28	0.000778037	5.19346e-06	elevated rate
3272	A	33444	0	0	0.0165308	reduced rate
3278	T	29159	23	0.000788779	4.21057e-05	elevated rate
3313	G	12748	12	0.000941324	0.00184088	elevated rate
3320	T	12509	11	0.000879367	0.00554951	elevated rate
3321	T	12664	9	0.000710676	0.049393	elevated rate
3324	T	12558	13	0.0010352	0.000449876	elevated rate
3334	G	20136	13	0.00064561	0.0224958	elevated rate
3336	G	20326	28	0.00137755	4.33401e-11	elevated rate
3338	T	20679	13	0.000628657	0.0264732	elevated rate
3342	G	20452	26	0.00127127	1.38646e-09	elevated rate
3359	G	20917	16	0.000764928	0.00156956	elevated rate
3366	G	22648	35	0.00154539	3.28988e-15	elevated rate
3380	T	22912	17	0.000741969	0.0013764	elevated rate
3382	T	23485	16	0.000681286	0.00487101	elevated rate
3406	G	17647	14	0.000793336	0.00281067	elevated rate
3418	G	20332	14	0.00068857	0.00933637	elevated rate
3420	G	20496	16	0.00078064	0.00126624	elevated rate
3424	G	20569	15	0.000729253	0.00387749	elevated rate
3441	G	19835	56	0.00282329	2.49609e-37	elevated rate
3443	T	20188	14	0.000693481	0.00880051	elevated rate
3453	G	21471	22	0.00102464	1.40663e-06	elevated rate
3484	G	20107	17	0.000845477	0.000333071	elevated rate
3490	G	19033	12	0.000630484	0.0350881	elevated rate
3498	C	17329	25	0.00144267	2.72121e-10	elevated rate
3502	G	16658	15	0.000900468	0.000506756	elevated rate
3510	G	16538	12	0.000725602	0.0137362	elevated rate
3519	C	15048	18	0.00119617	2.49595e-06	elevated rate
3522	T	14029	91	0.00648656	9.05101e-92	elevated rate
3552	G	19403	19	0.00097923	1.81574e-05	elevated rate
3585	G	14836	21	0.00141548	1.49939e-08	elevated rate
3598	G	27294	16	0.000586209	0.0187896	elevated rate
3605	A	27597	0	0	0.0381693	reduced rate
3614	A	28108	0	0	0.0388556	reduced rate
3621	G	27738	31	0.0011176	4.60575e-10	elevated rate
3633	G	28536	23	0.000805999	3.03212e-05	elevated rate
3634	A	28507	0	0	0.0394755	reduced rate
3640	A	28368	0	0	0.0393284	reduced rate
3643	C	29556	0	0	0.0287245	reduced rate
3645	G	29687	17	0.000572641	0.0173274	elevated rate
3659	A	31028	0	0	0.0216555	reduced rate
3660	A	30585	0	0	0.0214737	reduced rate
3695	G	17467	16	0.000916013	0.000236447	elevated rate
3714	T	17965	12	0.000667965	0.0245949	elevated rate
3730	G	18522	14	0.000755858	0.00435071	elevated rate
3751	A	14775	10	0.000676819	0.0439199	elevated rate
3765	G	15776	23	0.00145791	1.4029e-09	elevated rate
3786	G	13378	12	0.000896995	0.00280375	elevated rate
3838	G	17993	18	0.00100039	2.56814e-05	elevated rate
3840	G	18752	13	0.000693259	0.0131039	elevated rate
3844	G	20926	13	0.000621237	0.0286507	elevated rate
3846	G	29781	23	0.000772304	5.72159e-05	elevated rate
3849	G	29447	17	0.000577308	0.0161749	elevated rate
3858	G	29013	40	0.00137869	9.19944e-16	elevated rate
3864	G	28407	16	0.000563241	0.0258519	elevated rate
3878	G	25484	18	0.000706326	0.00155557	elevated rate
3914	G	16381	17	0.00103779	3.03212e-05	elevated rate
3921	T	17213	20	0.00116191	8.93059e-07	elevated rate
3925	G	17549	15	0.00085475	0.000816219	elevated rate
3944	T	18118	12	0.000662325	0.0258519	elevated rate
