# Supplementary material for: RNA polymerase inaccuracy underlies SARS-CoV-2 variants and vaccine heterogeneity
Source: Research Square preprint supplement (doi:10.21203/rs.3.rs-1690086/v1), 2022-06-02
Supplement: Supplementary file 2 [file d3e3fbfcb274cc506eb81084.docx]

Supplementary information for

**RNA polymerase inaccuracy underlies SARS-CoV-2 variants and mRNA vaccine heterogeneity**

Catherine C. Bradley, Alasdair J.E. Gordon, Chen Wang, Matthew B. Cooke, Brendan F. Kohrn, Scott R. Kennedy, Olivier Lichtarge, Shannon E. Ronca, Christophe Herman

Correspondence to: herman@bcm.edu

**Included files:**

Supplementary Table 1 - Clonal mutations in SARS-CoV-2 experimental isolates.

Clonal mutations present at ≥90% frequency and detected by tARC-seq are listed here for each SARS-CoV-2 isolate sequenced.

Supplementary Table 2 - Hot and cold spots for RNA variants in WT SARS-CoV-2.

Supplementary Table 2 lists all positions in WT SARS-CoV-2 with significantly elevated or reduced RNA variant frequencies relative to the genome-wide average. P-value <0.05 by Fisher’s exact test with Benjamini–Hochberg correction.

Supplementary Table 3 - Hot and cold spots for RNA variants in Alpha.

Supplementary Table 3 lists all positions in the Alpha isolate with significantly elevated or reduced RNA variant frequencies relative to the genome-wide average. P-value <0.05 by Fisher’s exact test with Benjamini–Hochberg correction.

Supplementary Table 4 - Concordant hot and cold spots between WT and Alpha SARS-CoV-2.

Hot and cold spots discovered in both samples are reported here. Out of 1,052 significant positions identified in WT and 1,405 in Alpha, 430 common sites were observed.

Supplementary Table 5 - Hot spots for insertions and deletions in WT SARS-CoV-2.

Supplementary Table 4 lists all positions in WT SARS-CoV-2 with significantly elevated or reduced frequencies of insertions and deletions relative to the genome-wide average. Positions were filtered for ≥10,000X sequencing depth to minimize skew due to low sampling. P-value <0.05 by Fisher’s exact test with Benjamini–Hochberg correction.

Supplementary Table 6 - Hot spots for insertions and deletions in Alpha.

Supplementary Table 5 lists all positions in the Alpha isolate with significantly elevated or reduced frequencies of insertions and deletions relative to the genome-wide average. Positions were filtered for ≥10,000X sequencing depth to minimize skew due to low sampling. P-value <0.05 by Fisher’s exact test with Benjamini–Hochberg correction.

Supplementary Table 7 - Hot and cold spots for RNA variants in the Pfizer vaccine.

Supplementary Table 6 lists all positions in the Pfizer vaccine Spike-encoding construct with significantly elevated or reduced RNA variant frequencies relative to the sequence average. P-value <0.05 by Fisher’s exact test with Benjamini–Hochberg correction.

Supplementary Data 1 - FASTA reference sequence for the Pfizer Spike-encoding construct.

Plasmid DNA was isolated from the Pfizer-BioNTech COVID-19 mRNA vaccine and the full sequence verified by Oxford Nanopore long-read sequencing. Reads from Pfizer vaccine ARC-seq libraries were aligned to this reference prior to variant calling. Additionally, isolated plasmid DNA served as a template for T7 *in vitro* transcription.
